# Supplementary material
Source: publisher figshare collection journal article supplement (https://gsapubs.figshare.com/ndownloader/files/34087091)
Supplement: Supplementary file 1 [file 34087091]

## Sheet: S1A U-Pb UCSC
Table S1A. U-Pb geochronologic analyses determined by LA-ICP-MS at the University of California–Santa Cruz
				Isotope ratios								Apparent ages (Ma)
Analysis	U	206Pb	U/Th	206Pb	± 1σ	207Pb	± 1σ	206Pb	± 1σ	error		206Pb	± 2σ	207Pb	± 2σ	206Pb	± 2σ	Best age	± 2σ	Conc	Iolite trim
	(ppm)	204Pb		207Pb	(%)	235U	(%)	238U	(%)	corr.		238U	(Ma)	235U	(Ma)	207Pb	(Ma)	(Ma)	(Ma)	(%)	Comments*
Sample FT-8 (accepted analyses = 46/125)
FT-8_56	63.6685	6935	3.65247	14.1243	1.05932	1.461	1.71116	0.1507	1.32714	0.17268		905	22	912	21	927	43	927	43	0.976268
FT-8_72	963.09	2776.49	4.08113	13.693	0.424483	1.643	1.49117	0.1615	1.26935	0.73216		965	23	987	19	1014	18	1014	18	0.951677
FT-8_24	47.6716	759.29	1.04507	13.4771	1.14555	1.729	1.76403	0.1692	1.32979	0.26324		1007	25	1015	23	1019	44	1019	44	0.988224
FT-8_90	286.11	32517.9	3.44428	13.4372	0.577802	1.665	1.56156	0.1627	1.29072	0.62663		971	24	994	20	1048	23	1048	23	0.926527
FT-8_27	171.368	8099.45	3.06722	13.3103	0.632237	1.803	1.55297	0.1736	1.26728	0.55207		1032	24	1045	20	1063	26	1063	26	0.970837
FT-8_63	80.064	10388.8	1.73301	13.1406	0.788436	1.904	1.57563	0.1798	1.30701	0.36873		1066	26	1080	21	1084	31	1084	31	0.983395
FT-8_51	194.709	6022.79	2.67634	12.982	0.584188	1.813	1.51682	0.1721	1.27833	0.44804		1024	24	1049	20	1119	24	1119	24	0.915103
FT-8_96	165.749	771.163	1.96716	12.6167	0.624527	2.05	1.56098	0.187	1.28342	0.56443		1105	26	1130	21	1171	25	1171	25	0.943638
FT-8_9	303.061	3723.28	3.77845	11.7178	0.468713	2.632	1.48176	0.2229	1.25617	0.54811		1297	30	1309	22	1320	18	1320	18	0.982576
FT-8_121	243.168	3991.98	1.14535	11.4312	0.537266	2.702	1.48038	0.226	1.28319	0.46118		1314	31	1328	22	1366	21	1366	21	0.961933
FT-8_109	154.341	25712.1	2.07293	11.302	0.559448	2.875	1.53043	0.2369	1.28746	0.54971		1370	32	1373	23	1389	21	1389	21	0.986321
FT-8_41	60.4365	10062.9	2.20894	11.2486	0.731159	2.813	1.65304	0.2299	1.34841	0.55363		1333	33	1355	25	1390	29	1390	29	0.958993
FT-8_106	79.6342	13763.6	2.24031	11.1982	0.671892	2.989	1.5557	0.2442	1.28993	0.43555		1408	33	1402	24	1400	26	1400	26	1.00571
FT-8_81	33.7372	5875.9	2.47586	11.1857	0.838926	2.99	1.67224	0.2426	1.36026	0.44531		1399	34	1399	25	1407	32	1407	32	0.994314
FT-8_31	177.965	30257	2.74925	11.1607	0.613839	2.845	1.54657	0.2321	1.29255	0.75503		1345	31	1365	23	1418	25	1418	25	0.948519	e
FT-8_12	137.558	6404.92	2.9209	11.0742	0.55371	3.125	1.52	0.248	1.27016	0.57672		1428	33	1437	23	1430	21	1430	21	0.998601
FT-8_112	94.0699	16321.4	2.16395	11.0132	0.660793	3.05	1.54098	0.2456	1.28257	0.41791		1415	32	1418	24	1433	25	1433	25	0.987439
FT-8_35	100.12	21330.1	2.34518	9.65251	0.579151	4.13	1.57385	0.2911	1.28822	0.48225		1646	37	1659	25	1687	22	1687	22	0.975697
FT-8_62	101.937	21253.6	4.22222	9.6432	0.530376	4.16	1.5625	0.2883	1.28339	0.57327		1632	37	1664	25	1689	21	1689	21	0.966252
FT-8_53	17.0357	517.885	1.46589	9.57854	1.00575	3.82	1.83246	0.2676	1.51345	0.53975		1526	41	1590	30	1691	38	1691	38	0.902425
FT-8_11	82.0677	1641.54	1.8737	9.3633	0.561798	4.67	1.49893	0.3137	1.29104	0.51773		1758	40	1760	25	1744	20	1744	20	1.00803
FT-8_33	108.355	23145.7	1.37259	9.31099	0.558659	4.3	1.51163	0.2919	1.31894	0.68598		1650	38	1691	26	1752	20	1752	20	0.941781
FT-8_1	502.113	16696.9	3.16608	9.29887	0.399851	4.23	1.41844	0.2844	1.26582	0.77618		1613	36	1678	24	1757	15	1757	15	0.918042
FT-8_124	110.22	2341.58	1.22124	9.25926	0.555556	4.57	1.53173	0.3074	1.30124	0.59399		1727	39	1742	25	1761	20	1761	20	0.980693
FT-8_29	110.181	2081.66	3.98674	9.25926	0.555556	4.48	1.5625	0.3011	1.27864	0.56655		1696	38	1728	25	1762	20	1762	20	0.962543
FT-8_25	103.971	2494.22	2.36621	9.25069	0.555042	4.76	1.47059	0.3187	1.30217	0.61427		1782	41	1776	25	1762	21	1762	21	1.01135
FT-8_117	466.439	7215.29	13.0317	9.26526	0.403039	4.29	1.51515	0.2922	1.26626	0.75406		1652	37	1691	24	1763	15	1763	15	0.937039
FT-8_73	490.431	108936	1.35088	9.25326	0.407144	4.63	1.51188	0.3085	1.26418	0.74205		1733	38	1754	25	1766	15	1766	15	0.981314
FT-8_54	302.783	8806.13	3.14418	9.22509	0.447417	4.58	1.52838	0.3081	1.26582	0.6514		1731	38	1744	25	1770	16	1770	16	0.977966
FT-8_20	274.757	62299.5	1.79646	9.22254	0.433459	4.68	1.49573	0.3101	1.25766	0.66603		1741	38	1762	25	1771	16	1771	16	0.98306
FT-8_2	237.945	25824.5	1.20663	9.22084	0.43799	4.68	1.49573	0.3126	1.2636	0.70173		1753	39	1764	25	1771	16	1771	16	0.989836
FT-8_59	280.618	59470.7	5.33493	9.21659	0.460829	4.47	1.45414	0.2977	1.27645	0.69701		1679	38	1724	25	1773	17	1773	17	0.946983
FT-8_91	484.272	107444	6.25724	9.22254	0.40118	4.64	1.50862	0.3106	1.25563	0.7396		1744	39	1756	25	1773	15	1773	15	0.983644
FT-8_13	289.615	14596.6	2.5905	9.20132	0.437063	4.52	1.43805	0.299	1.25418	0.60698		1686	37	1734	24	1775	16	1775	16	0.949859
FT-8_86	375.412	8321.7	2.25225	9.20217	0.427901	4.39	1.48064	0.2934	1.26108	0.70671		1658	37	1709	24	1776	16	1776	16	0.933559
FT-8_38	377.76	83339.3	1.82368	9.20217	0.414098	4.5	1.44444	0.3008	1.2633	0.683		1695	37	1731	24	1776	15	1776	15	0.954392
FT-8_3	158.007	36440.3	3.22708	9.2081	0.460405	4.72	1.48305	0.3144	1.27226	0.62085		1762	39	1771	24	1777	17	1777	17	0.991559
FT-8_92	212.49	44871.9	0.958228	9.19118	0.459559	4.46	1.4574	0.2974	1.27774	0.68306		1678	38	1722	25	1778	17	1778	17	0.943757
FT-8_114	102.311	22791.4	2.00466	9.10747	0.546448	4.72	1.48305	0.3148	1.28653	0.56065		1763	40	1769	25	1792	21	1792	21	0.983817
FT-8_17	67.9974	2719.83	1.43778	8.96861	0.627803	5.05	1.58416	0.3251	1.29191	0.54225		1814	41	1825	26	1819	22	1819	22	0.997251
FT-8_7	108.997	772.27	5.05621	8.91266	0.534759	5.04	1.4881	0.3249	1.27732	0.55903		1813	40	1824	26	1834	19	1834	19	0.98855
FT-8_60	752.991	7699.42	2.92782	8.86997	0.385844	4.92	1.42276	0.3151	1.25357	0.76342		1765	39	1806	25	1843	14	1843	14	0.957678
FT-8_57	347.448	10653.2	1.48494	8.62218	0.413864	4.9	1.42857	0.3071	1.25366	0.67726		1726	38	1803	25	1893	15	1893	15	0.91178
FT-8_30	290.49	74330	1.52975	7.72798	0.425039	6.15	1.46341	0.3453	1.25977	0.69502		1912	42	1997	25	2088	15	2088	15	0.915709
FT-8_26	113.305	4120.5	1.26508	5.48546	0.438837	11.83	1.47929	0.469	1.27932	0.75108		2477	52	2589	28	2673	14	2673	14	0.926674
FT-8_98	196.399	64798.5	2.59466	5.40833	0.405625	11.89	1.47183	0.465	1.29032	0.7848		2462	53	2595	27	2696	13	2696	13	0.913205
Sample FT-8 (rejected analyses = 79/125)
FT-8_5	2533.52	576.492	5.9819	10.6383	0.585106	0.391	1.91816	0.02997	1.51818	0.95606		190.3	5.7	334	11	1502	21	190.3	5.7	0.126698	f
FT-8_71	2972.45	911.894	5.01028	11.7827	0.447744	0.436	1.49083	0.03691	1.30046	0.79919		233.6	5.9	367.8	9.5	1310	17	233.6	5.9	0.178321	b
FT-8_36	3528.52	540.366	0.147812	7.45156	0.596125	0.96	2.39583	0.0518	2.12355	0.96378		325	13	676	23	2149	20	325	13	0.151233	b, e
FT-8_6	1527.59	629.655	1.99654	11.4168	0.525174	0.651	1.6129	0.0537	1.30354	0.81856		337	8.8	508	13	1369	20	337	8.8	0.246165	g
FT-8_44	1532.65	799.409	6.72476	11.1433	0.451304	0.679	1.47275	0.0552	1.26812	0.67585		346.6	8.6	526	12	1417	17	346.6	8.6	0.244601	b
FT-8_104	1236.52	668.887	1.92072	9.87459	0.464106	0.901	1.55383	0.0646	1.31579	0.8482		404	10	651	15	1646	17	404	10	0.245443
FT-8_67	1679.37	1096.26	0.581579	13.5208	0.459708	0.737	2.64586	0.0714	2.52101	0.98698		443	21	551	22	1037	19	443	21	0.427194	b
FT-8_122	1533.68	1391.23	3.51724	9.88826	0.430139	1.246	1.64526	0.0901	1.49834	0.94284		556	16	819	18	1643	16	556	16	0.338405
FT-8_93	822.834	706.98	0.448389	12.9166	0.536037	1.063	1.78739	0.0992	1.46169	0.91285		609	17	732	19	1127	21	609	17	0.540373	e
FT-8_94	1038.1	980.633	5.49811	9.55201	0.472825	1.567	1.69113	0.1083	1.43121	0.93092		662	18	955	21	1707	18	662	18	0.387815	f
FT-8_107	1216.05	2784.73	15.0024	9.07112	0.426343	1.683	1.60428	0.1114	1.3465	0.91379		680	18	1001	21	1802	16	680	18	0.377358
FT-8_111	437.011	35698	2.89461	13.8466	0.560786	1.146	1.52705	0.1158	1.29534	0.58431		706	17	774	17	988	23	706	17	0.714575
FT-8_77	1003.1	1605.11	2.45112	6.05327	0.393462	2.652	1.546	0.1163	1.33276	0.91956		709	18	1313	23	2508	14	709	18	0.282695
FT-8_97	288.599	7365.3	2.65329	11.3766	0.568828	1.419	1.55039	0.1168	1.32705	0.63231		712	18	896	19	1377	23	712	18	0.517066
FT-8_123	1403.3	2014.93	0.997594	9.92063	0.411706	1.631	1.62477	0.1177	1.40187	0.93973		717	19	980	21	1638	15	717	19	0.437729
FT-8_74	450.6	2261.7	0.173227	11.0011	0.990099	1.68	4.16667	0.1272	3.73428	0.98533		761	54	931	55	1420	40	761	54	0.535915	e
FT-8_84	719.341	1324.4	2.77015	11.4956	0.459823	1.55	3.54839	0.1289	3.37471	0.99475		772	50	906	44	1357	18	772	50	0.568902
FT-8_103	201.934	19751.7	2.29562	11.2233	0.617284	1.707	1.58172	0.1392	1.32902	0.67852		840	21	1010	21	1401	25	840	21	0.599572
FT-8_88	609.755	3305.97	2.9913	13.6129	0.469643	1.427	1.89208	0.1411	1.73636	0.96254		849	28	893	24	1023	19	849	28	0.829912
FT-8_28	1053.92	2315.93	1.92579	9.61446	0.413422	2.053	1.55869	0.1431	1.32774	0.9104		862	22	1132	22	1695	15	862	22	0.508555
FT-8_8	848.719	1287.52	2.51726	6.65336	0.399202	3.05	1.63934	0.1462	1.43639	0.95175		879	23	1416	25	2349	14	879	23	0.374202
FT-8_87	559.842	4233.06	3.85087	13.5943	0.489396	1.54	1.49351	0.152	1.28289	0.63628		912	22	945	18	1025	20	1025	20	0.889756
FT-8_101	335.227	47516.2	3.36941	11.2549	0.489589	2.442	1.51515	0.1998	1.3013	0.76411		1176	27	1253	22	1397	19	1397	19	0.841804
FT-8_76	371.53	54389.2	2.48591	11.0988	0.477248	2.548	1.49137	0.2049	1.29331	0.68385		1201	28	1285	22	1426	19	1426	19	0.842216
FT-8_47	242.293	3518.44	1.58303	11.0865	0.504435	2.526	1.7023	0.2047	1.46556	0.90369		1199	32	1274	25	1427	19	1427	19	0.840224
FT-8_49	299.773	288.925	11.2854	10.3627	1.86528	2.64	4.54545	0.187	4.27807	0.94171		1078	85	1184	75	1531	75	1531	75	0.704115	g
FT-8_32	216.129	1611.37	2.14261	9.97009	0.797607	3.21	1.7134	0.2323	1.26991	0.62886		1346	31	1454	26	1616	29	1616	29	0.832921	e
FT-8_15	479.7	7739.03	2.27764	9.87654	0.424691	3.329	1.47191	0.2363	1.26957	0.75548		1367	31	1488	23	1645	16	1645	16	0.831003
FT-8_79	338.481	46559.6	1.0666	9.87069	0.454052	2.694	1.54046	0.1934	1.31851	0.84022		1139	28	1326	23	1646	17	1646	17	0.691981
FT-8_116	631.417	3645.5	2.73521	9.80392	0.421569	2.793	1.64697	0.2009	1.4435	0.94271		1179	31	1350	25	1660	15	1660	15	0.710241
FT-8_78	525.923	28848.8	1.65675	9.74469	0.423894	3.42	1.46199	0.2411	1.28577	0.79776		1392	32	1507	24	1670	16	1670	16	0.833533
FT-8_48	676.813	2869.34	4.16168	9.70968	0.422371	2.998	1.60107	0.2129	1.36214	0.93264		1243	31	1404	24	1677	16	1677	16	0.741205
FT-8_18	585.584	2189.87	1.5002	9.62279	0.428214	2.307	1.66883	0.1593	1.50659	0.94556		952	27	1210	24	1693	16	1693	16	0.562315
FT-8_105	560.561	4832.09	0.726624	9.58681	0.445787	2.761	1.5393	0.1927	1.3233	0.84156		1135	27	1343	23	1701	16	1701	16	0.667255
FT-8_102	780.997	1810.28	1.78289	9.56114	0.406349	2.725	1.68807	0.1895	1.47757	0.96317		1117	30	1330	26	1707	15	1707	15	0.654364
FT-8_21	243.88	12554.2	2.79455	9.53652	0.457753	3.79	1.45119	0.2603	1.28698	0.78341		1491	35	1589	25	1709	17	1709	17	0.87244
FT-8_45	601.706	1559.77	5.60939	9.48497	0.431566	2.263	1.72338	0.1566	1.53257	0.95757		937	27	1198	25	1721	16	1721	16	0.544451
FT-8_61	1051.03	3917.34	5.60554	9.46701	0.388147	2.889	1.55763	0.1967	1.34723	0.94124		1157	29	1377	23	1724	14	1724	14	0.671114
FT-8_125	727.709	2961.51	2.77883	9.46432	0.406966	3.284	1.47686	0.2256	1.2633	0.80395		1311	30	1476	23	1724	15	1724	15	0.760441
FT-8_40	720.357	2689.7	2.9426	9.43931	0.40589	2.927	1.53741	0.2007	1.34529	0.90533		1179	29	1387	23	1729	15	1729	15	0.681897
FT-8_85	560.871	3419.34	3.92348	9.43841	0.420009	3.058	1.47155	0.2102	1.2607	0.73018		1229	28	1421	23	1729	15	1729	15	0.710816
FT-8_70	911.133	5693.12	2.64429	9.41442	0.400113	3.076	1.52796	0.2071	1.32786	0.90832		1213	29	1424	24	1735	14	1735	14	0.699135
FT-8_23	534.295	3802.29	2.38437	9.3985	0.432331	3.12	1.76282	0.211	1.51659	0.95516		1233	34	1431	27	1737	16	1737	16	0.709845
FT-8_43	716.2	4167.37	3.51702	9.3932	0.394514	3.63	1.51515	0.2488	1.28617	0.84085		1432	33	1556	24	1738	14	1738	14	0.823936
FT-8_69	616.993	8282.23	2.85114	9.38615	0.41299	3.55	1.83099	0.2383	1.65757	0.97414		1375	41	1529	29	1739	15	1739	15	0.790684
FT-8_55	449.412	84590.2	3.2813	9.38879	0.422496	3.78	1.45503	0.2588	1.2558	0.69509		1484	33	1589	23	1739	16	1739	16	0.853364
FT-8_66	426.289	77789.7	1.19665	9.36242	0.416628	3.81	1.44357	0.2556	1.31064	0.85215		1467	34	1594	24	1745	15	1745	15	0.840688
FT-8_52	303.341	4773.37	2.85675	9.30579	0.451331	3.66	1.50273	0.2492	1.28411	0.71575		1434	33	1562	24	1754	17	1754	17	0.81756
FT-8_58	104.043	3182.33	2.30821	9.30233	0.55814	3.76	1.72872	0.2528	1.52294	0.87699		1451	39	1576	28	1754	21	1754	21	0.827252
FT-8_82	291.942	55903.6	1.55546	9.30665	0.446719	3.93	1.52672	0.2663	1.27676	0.68381		1521	34	1618	24	1754	16	1754	16	0.867161
FT-8_22	319.599	58201.2	13.0108	9.32053	0.428745	3.99	1.8797	0.2677	1.73702	0.97601		1524	48	1619	34	1754	15	1754	15	0.868871
FT-8_115	424.354	60366.9	1.49341	9.30492	0.432679	2.961	1.53664	0.2017	1.31383	0.85418		1184	29	1397	23	1755	16	1755	16	0.674644
FT-8_4	713.798	5368.54	3.49164	9.30233	0.395349	3.301	1.4844	0.2221	1.28321	0.86236		1293	30	1480	23	1756	15	1756	15	0.736333
FT-8_34	517.289	104080	3.82692	9.298	0.409112	4.07	1.4742	0.2753	1.2895	0.82109		1567	36	1647	25	1757	15	1757	15	0.891861
FT-8_118	235.504	3348.7	2.3343	9.27644	0.463822	3.19	1.72414	0.2177	1.49288	0.90331		1268	34	1450	26	1759	18	1759	18	0.720864
FT-8_75	152.922	25350.5	1.51915	9.25069	0.555042	3.49	1.57593	0.2331	1.35135	0.7984		1350	33	1523	25	1765	19	1765	19	0.764873
FT-8_42	393.052	79035.5	4.81741	9.25412	0.416435	4.08	1.47059	0.2753	1.25318	0.68935		1567	35	1650	24	1766	15	1766	15	0.887316
FT-8_46	273.516	4142.99	0.747033	9.24214	0.508318	2.67	2.05993	0.1801	1.83232	0.96879		1064	37	1306	32	1767	18	1767	18	0.602151
FT-8_120	191.703	36809.2	1.07429	9.23361	0.461681	4	1.5	0.271	1.29151	0.72016		1545	35	1633	24	1771	17	1771	17	0.872388
FT-8_119	804.51	1460.39	0.272744	9.15919	0.4488	2.86	1.59091	0.1917	1.38237	0.89674		1130	29	1369	24	1785	17	1785	17	0.633053	f
FT-8_83	536.651	4279.52	1.42283	9.12909	0.442761	3.231	1.50108	0.2145	1.28205	0.63245		1253	29	1463	23	1789	16	1789	16	0.700391	e
FT-8_37	393.22	70762.7	3.42442	9.08348	0.440549	3.74	1.47059	0.2465	1.27789	0.73234		1420	32	1578	24	1799	16	1799	16	0.789327
FT-8_14	336.155	65631.8	2.79694	9.08265	0.422343	4.09	1.46699	0.2667	1.25609	0.65668		1524	34	1652	24	1799	15	1799	15	0.847137
FT-8_80	67.9771	13545.6	9.02856	9.04977	0.633484	4.23	1.53664	0.2782	1.31201	0.55344		1582	37	1676	26	1805	24	1805	24	0.876454
FT-8_110	166.852	7661.78	2.44658	8.98473	0.49416	4.22	1.54028	0.2769	1.30011	0.68084		1575	36	1677	24	1819	18	1819	18	0.86586
FT-8_99	500.22	4206.75	1.53712	8.86525	0.443262	3.67	1.49864	0.2357	1.2728	0.71918		1364	31	1564	24	1843	16	1843	16	0.740098
FT-8_19	111.15	3950.43	4.03071	8.79507	0.57168	3.9	1.53846	0.2466	1.29765	0.59974		1420	33	1612	25	1853	21	1853	21	0.766325
FT-8_16	667.778	4138.13	1.0337	8.59328	0.408181	3.27	1.52905	0.2018	1.33796	0.94371		1184	29	1471	25	1901	14	1901	14	0.62283
FT-8_89	994.877	2336.56	3.89182	7.94281	0.516283	3.025	1.52066	0.1749	1.28645	0.62544		1039	25	1412	23	2037	19	2037	19	0.510064	f
FT-8_113	955.745	2790.79	2.06278	6.45995	0.452196	3.54	1.83616	0.1668	1.61871	0.97758		993	30	1527	29	2398	15	2398	15	0.414095	f
FT-8_64	762.41	3048.82	1.50376	5.98444	0.388989	5.5	1.72727	0.2351	1.48873	0.97126		1364	38	1893	29	2527	13	2527	13	0.53977
FT-8_65	535.299	2620.12	3.17418	5.83771	0.40864	4.65	1.50538	0.1946	1.31038	0.86574		1146	27	1756	25	2570	14	2570	14	0.445914
FT-8_68	372.292	17244	2.4622	5.82411	0.436808	7.97	1.69385	0.332	1.43072	0.95124		1846	47	2228	30	2572	15	2572	15	0.717729	e
FT-8_100	407.023	6371.32	1.59941	5.77367	0.404157	8.75	1.65714	0.366	1.36612	0.95871		2009	49	2306	31	2589	13	2589	13	0.775975
FT-8_108	153.558	40368.4	1.44469	5.57414	0.445931	9.22	1.51844	0.374	1.3369	0.86083		2045	47	2357	29	2646	15	2646	15	0.772865
FT-8_10	119.824	1188.92	3.25385	5.42299	0.460954	9.33	1.7149	0.364	1.51099	0.9404		1998	53	2362	32	2692	15	2692	15	0.742199
FT-8_95	185.534	3951.61	1.33527	5.28541	0.44926	9.62	1.55925	0.3681	1.34474	0.86957		2019	47	2397	28	2733	15	2733	15	0.738749
FT-8_39	241.888	14373.2	1.59347	5.11247	0.408998	11	1.81818	0.408	1.59314	0.97854		2198	61	2510	36	2788	13	2788	13	0.788379
FT-8_50	594.06	4349.59	0.358042	5.05561	0.429727	6.64	2.18373	0.2445	1.88139	0.98907		1404	48	2042	39	2808	14	2808	14	0.5
Sample FT-29 (accepted analyses = 67/110)
FT-29_91	142.13	15799.8	2.80232	13.947	0.69735	1.607	1.55569	0.1616	1.26856	0.34082		966	23	971	20	964	29	964	29	1.00207
FT-29_29	100.524	4148.99	0.85365	13.6986	0.821918	1.745	1.63324	0.1735	1.29683	0.35879		1031	25	1022	21	997	35	997	35	1.0341
FT-29_13	81.8699	8977.2	3.85387	13.6426	0.818554	1.644	1.76399	0.1614	1.42503	0.63992		964	26	983	22	1009	33	1009	33	0.955401
FT-29_79	407.449	46853.3	0.887961	13.7268	0.494166	1.668	1.4988	0.1662	1.26354	0.54405		991	23	996	19	1009	20	1009	20	0.982161
FT-29_65	34.457	503.353	1.92854	13.4953	1.21457	1.822	1.86608	0.1779	1.34907	0.23675		1055	26	1047	25	1011	53	1011	53	1.04352
FT-29_5	267.541	30819.9	3.14281	13.6743	0.52646	1.692	1.50709	0.1674	1.28435	0.59478		998	24	1005	19	1012	22	1012	22	0.986166
FT-29_35	274.314	7785.11	2.85816	13.5943	0.550571	1.674	1.49343	0.1638	1.25153	0.50556		978	23	998	19	1024	22	1024	22	0.955078
FT-29_70	213.05	9504.05	1.26704	13.5501	0.623306	1.648	1.57767	0.1611	1.30354	0.55931		963	23	987	20	1028	26	1028	26	0.93677
FT-29_26	160.548	9267.75	2.11347	13.5281	0.649351	1.74	1.52299	0.1716	1.28205	0.38454		1021	24	1022	20	1030	27	1030	27	0.991262
FT-29_89	404.755	10297.4	2.42948	13.5777	0.515954	1.651	1.51423	0.162	1.26543	0.63119		968	23	990	19	1031	20	1031	20	0.938894
FT-29_93	375.23	41326.8	0.777888	13.5575	0.508406	1.637	1.4661	0.1598	1.25156	0.41078		955	22	984	19	1032	20	1032	20	0.925388
FT-29_53	92.4476	10891	1.25595	13.4953	0.74224	1.699	1.58917	0.1675	1.28358	0.38541		998	24	1007	21	1033	30	1033	30	0.966118
FT-29_21	68.03	7496.8	2.18505	13.459	1.00942	1.642	1.73569	0.1615	1.33127	0.43136		964	24	984	22	1034	39	1034	39	0.932302
FT-29_47	98.8944	12278	146.528	13.2979	0.731383	1.809	1.57546	0.1769	1.30017	0.36712		1050	25	1048	20	1063	30	1063	30	0.98777
FT-29_50	88.3163	4005.61	1.26969	13.2979	0.864362	1.811	1.65654	0.1761	1.30608	0.3483		1045	25	1047	21	1066	34	1066	34	0.9803
FT-29_105	403.057	47780.5	2.2256	13.2926	0.51841	1.777	1.49128	0.1714	1.25438	0.52442		1020	24	1037	20	1072	21	1072	21	0.951493
FT-29_9	174.835	21801.5	1.91991	13.2328	0.635173	1.896	1.55591	0.1808	1.27212	0.49281		1071	25	1078	21	1080	25	1080	25	0.991667
FT-29_20	55.2269	1323.04	1.05602	13.0719	0.980392	1.935	1.70543	0.1834	1.33588	0.33069		1086	26	1090	23	1083	41	1083	41	1.00277
FT-29_106	176.676	22090.2	2.50636	13.1752	0.592885	1.9	1.52632	0.1812	1.26932	0.48682		1073	25	1080	21	1085	24	1085	24	0.98894
FT-29_41	236.271	29252	1.72075	13.1996	0.567582	1.839	1.52257	0.1777	1.26618	0.65925		1054	25	1058	20	1086	23	1086	23	0.970534
FT-29_98	58.728	7010.8	1.3067	12.8535	0.96401	1.855	1.69811	0.1734	1.35525	0.4021		1030	26	1061	23	1123	38	1123	38	0.917186
FT-29_8	74.8594	2304.43	1.22546	12.8866	0.902062	1.987	1.61047	0.1852	1.2959	0.17479		1095	26	1109	22	1124	36	1124	36	0.974199
FT-29_22	675.542	3410.61	7.08234	12.9116	0.438993	1.967	1.47433	0.1848	1.24459	0.56334		1093	25	1104	20	1130	17	1130	17	0.967257
FT-29_49	118.703	15876	3.54263	12.8535	0.706941	2.019	1.56018	0.1905	1.28609	0.38829		1124	26	1120	21	1133	27	1133	27	0.992056
FT-29_2	174.497	6864.54	3.5794	12.7747	0.606796	1.995	1.65414	0.1844	1.43709	0.7786		1090	29	1110	23	1149	24	1149	24	0.948651
FT-29_88	352.018	46597.5	2.36637	12.7812	0.498466	2.074	1.4947	0.1916	1.27871	0.61242		1130	26	1139	20	1149	20	1149	20	0.983464
FT-29_1	308.406	38406.4	2.17125	12.7616	0.510465	1.955	1.48338	0.181	1.27072	0.53343		1072	25	1099	20	1155	21	1155	21	0.928139
FT-29_45	38.8092	2761.29	2.14234	12.6582	1.01266	2.034	1.72075	0.1901	1.3677	0.38014		1121	28	1123	24	1155	39	1155	39	0.970563
FT-29_15	193.899	7042.11	2.4631	12.7584	0.606022	2.038	1.5211	0.1873	1.28137	0.50473		1107	26	1129	20	1156	24	1156	24	0.957612
FT-29_27	236.526	32020.2	2.31572	12.7421	0.516055	2.134	1.49953	0.1979	1.26326	0.60438		1164	27	1159	21	1156	20	1156	20	1.00692
FT-29_6	190.601	24844	2.69228	12.7016	0.590626	2.089	1.53183	0.1914	1.28004	0.54177		1129	26	1143	21	1158	23	1158	23	0.974957
FT-29_85	237.188	15885.3	2.13925	12.7097	0.533808	2.037	1.4973	0.1881	1.27592	0.55594		1111	26	1127	21	1159	21	1159	21	0.958585
FT-29_95	181.013	24549.7	2.97508	12.6823	0.583386	2.147	1.53703	0.1968	1.27033	0.54188		1158	27	1162	21	1164	23	1164	23	0.994845
FT-29_86	426.718	57712.6	4.62574	12.6119	0.472947	2.136	1.47472	0.1958	1.25128	0.65462		1152	27	1160	20	1176	19	1176	19	0.979592
FT-29_108	178.388	24615.4	4.17206	12.5235	0.588604	2.205	1.51927	0.2	1.275	0.46018		1175	27	1181	21	1187	23	1187	23	0.98989
FT-29_34	118.421	5544.28	1.11297	12.3916	0.681537	2.175	1.56322	0.1945	1.28535	0.40886		1145	27	1171	22	1207	27	1207	27	0.948633
FT-29_55	178.063	7291.19	0.908205	12.2775	0.607735	2.1	1.54762	0.1889	1.29698	0.52173		1115	27	1147	21	1225	24	1225	24	0.910204
FT-29_52	349.019	15674.6	2.64684	11.7592	0.470367	2.38	1.4916	0.2044	1.27202	0.63966		1198	28	1235	21	1313	18	1313	18	0.912414
FT-29_39	79.7762	12939.6	3.55219	11.4548	0.687285	2.803	1.56975	0.2336	1.30565	0.40143		1353	32	1354	24	1356	28	1356	28	0.997788
FT-29_92	87.7278	10188.7	2.24812	11.3895	0.740319	2.827	1.59179	0.2322	1.31352	0.4629		1347	32	1360	24	1367	28	1367	28	0.985369
FT-29_43	279.877	43667.7	4.05451	11.426	0.485603	2.661	1.50319	0.2235	1.29754	0.69298		1300	30	1316	22	1368	19	1368	19	0.950292
FT-29_94	121.275	19716	3.10193	11.3895	0.569476	2.87	1.5331	0.2357	1.29402	0.55585		1365	32	1373	23	1373	23	1373	23	0.994173
FT-29_10	697.058	3967.36	4.54155	11.3753	0.415197	2.741	1.45932	0.2253	1.26498	0.69954		1309	30	1339	22	1379	16	1379	16	0.949239
FT-29_32	200.989	11013.8	2.08971	11.3199	0.509396	2.889	1.4884	0.2353	1.25372	0.54691		1362	31	1378	23	1387	19	1387	19	0.981975
FT-29_82	315.613	9062.86	1.64795	11.3097	0.48066	2.669	1.51742	0.2195	1.29841	0.79066		1279	30	1318	23	1388	18	1388	18	0.92147
FT-29_37	195.423	6284.61	0.643751	11.2841	0.535996	2.741	1.4958	0.2236	1.2746	0.41533		1301	30	1338	22	1391	21	1391	21	0.935298
FT-29_57	216.455	34407.9	3.08575	11.2778	0.490583	2.756	1.48766	0.2273	1.25385	0.52399		1320	30	1343	22	1393	19	1393	19	0.947595
FT-29_83	452.841	69621.1	2.7314	11.1383	0.417688	2.752	1.47166	0.2228	1.25673	0.72813		1297	30	1342	22	1420	16	1420	16	0.91338
FT-29_56	176.28	28413.5	2.00098	11.0963	0.549268	2.833	1.51783	0.2297	1.28428	0.53376		1332	31	1363	23	1425	21	1425	21	0.934737
FT-29_68	128.903	22454.9	2.06006	10.9409	0.601751	3.178	1.51038	0.2515	1.27237	0.44331		1446	33	1451	23	1451	22	1451	22	0.996554
FT-29_76	254.036	11897.7	2.09582	10.9409	0.47593	2.993	1.4868	0.2373	1.26422	0.65516		1372	31	1405	23	1452	18	1452	18	0.944904
FT-29_42	135.121	2325.96	2.51777	10.8696	0.597826	3.088	1.50583	0.2469	1.27582	0.44356		1422	33	1428	23	1461	22	1461	22	0.973306
FT-29_3	86.0634	956.967	2.70054	10.7875	1.56419	3.01	2.15947	0.2357	1.29402	0.2837		1364	32	1402	28	1464	52	1464	52	0.931694	g
FT-29_36	169.823	2074.38	4.29974	10.6349	0.52111	3.278	1.49481	0.2519	1.2505	0.49446		1448	33	1475	23	1504	20	1504	20	0.962766
FT-29_78	90.9202	18436.9	1.27052	9.7371	0.584226	4.15	1.56627	0.2933	1.2956	0.50225		1657	38	1663	25	1668	23	1668	23	0.993405
FT-29_104	108.847	10217.7	1.09982	9.62464	0.529355	4.05	1.60494	0.2822	1.31113	0.67833		1602	37	1641	25	1692	21	1692	21	0.946809
FT-29_107	140.16	29205.5	2.6837	9.40734	0.517404	4.43	1.46727	0.3017	1.2761	0.5785		1699	38	1718	25	1732	20	1732	20	0.980947
FT-29_84	177.579	37875.6	2.16039	9.25069	0.508788	4.6	1.52174	0.309	1.27832	0.60378		1735	39	1748	25	1767	18	1767	18	0.98189
FT-29_11	234.538	55084	2.86169	8.56898	0.428449	5.57	1.43627	0.3435	1.26638	0.6786		1903	42	1911	25	1905	15	1905	15	0.99895
FT-29_75	296.224	15712.8	0.972048	8.29187	0.414594	5.64	1.50709	0.3389	1.26881	0.67663		1881	41	1921	26	1963	15	1963	15	0.958227
FT-29_102	271.393	86784.7	3.51737	5.62746	0.393922	11.46	1.43979	0.468	1.28205	0.78988		2474	52	2560	27	2631	13	2631	13	0.940327
FT-29_66	337.45	18229.2	0.888558	5.52486	0.38674	11.82	1.43824	0.473	1.2685	0.81882		2496	53	2590	28	2662	12	2662	12	0.937641
FT-29_64	176.327	56740	1.13342	5.50358	0.412768	11.54	1.47314	0.462	1.2987	0.72997		2447	51	2567	27	2667	14	2667	14	0.91751
FT-29_16	155.281	11165	1.49722	5.44366	0.435493	12.35	1.45749	0.484	1.23967	0.77316		2545	54	2630	28	2686	14	2686	14	0.947506
FT-29_17	142.811	49324.4	1.59683	5.4407	0.408052	12.9	1.47287	0.505	1.28713	0.72356		2635	54	2671	28	2686	14	2686	14	0.981013
FT-29_90	93.4211	33133.1	0.958939	5.38503	0.457728	13.21	1.47615	0.514	1.26459	0.66737		2672	56	2693	29	2702	16	2702	16	0.988897
FT-29_99	262.731	83299.5	2.1583	5.37924	0.376547	11.76	1.4881	0.46	1.30435	0.84489		2437	52	2584	28	2705	13	2705	13	0.900924
Sample FT-29 (rejected analyses = 43/110)
FT-29_14	822.459	1276.59	0.56251	13.2732	0.52429	0.746	1.54155	0.0711	1.33615	0.70941		443	11	565	13	1073	21	443	11	0.412861	b
FT-29_18	567.639	2710.48	4.08359	12.0163	0.498678	0.936	1.49573	0.0811	1.2947	0.72721		503	13	670	15	1270	20	503	13	0.396063
FT-29_87	833.187	579.172	3.47785	11.4943	1.26437	1.179	2.29008	0.0971	1.39032	0.84801		597	16	782	22	1327	43	597	16	0.449887	b, e
FT-29_51	497.227	304.45	1.99877	7.96813	2.11155	1.84	2.71739	0.1064	1.45677	0.47739		651	18	1032	35	1931	75	651	18	0.337131	b, e
FT-29_62	208.974	1257.84	2.9347	12.3457	0.987654	1.208	1.82119	0.109	1.33028	0.48379		667	17	800	19	1202	35	667	17	0.554908	e
FT-29_103	537.801	1761.74	2.76091	9.4697	0.473485	1.839	1.71289	0.1263	1.50435	0.92818		766	22	1055	23	1721	18	766	22	0.44509
FT-29_109	387.093	908.882	0.559825	10.8143	0.524494	1.798	1.6129	0.1405	1.3879	0.84487		847	22	1043	21	1473	20	847	22	0.575017	b
FT-29_23	255.984	6017.3	0.429045	6.33312	0.474984	3.09	1.61812	0.1425	1.4386	0.89838		858	23	1425	26	2431	16	858	23	0.352941
FT-29_60	89.4643	9322.7	1.77087	13.0548	0.913838	1.558	1.73299	0.1495	1.43813	0.59071		898	24	951	22	1091	37	898	24	0.823098
FT-29_110	386.972	41479.1	4.3928	13.1718	0.52687	1.627	1.50584	0.1552	1.28866	0.6258		930	22	980	19	1088	21	1088	21	0.854779
FT-29_24	325.634	34046.4	2.3325	13.0634	0.535598	1.606	1.4944	0.1525	1.27869	0.51617		915	22	971	19	1104	21	1104	21	0.828804
FT-29_77	238.573	6776.82	0.870764	12.9618	0.570318	1.654	1.60218	0.156	1.41026	0.75536		934	25	991	20	1119	23	1119	23	0.834674
FT-29_101	91.7541	3768.52	2.38781	12.5471	0.878294	1.695	2.18289	0.1537	1.91932	0.85594		919	33	994	29	1179	36	1179	36	0.779474
FT-29_81	270.432	30834.1	2.25239	12.5094	0.544158	1.807	1.54953	0.1647	1.33576	0.73797		982	24	1047	20	1192	21	1192	21	0.823826
FT-29_96	588.523	3175.4	1.81906	12.4719	0.436518	2	1.525	0.1804	1.30266	0.84924		1069	26	1114	21	1199	17	1199	17	0.891576
FT-29_72	330.372	37050.5	3.06673	12.2895	0.497726	1.831	1.50191	0.162	1.26543	0.63802		968	23	1056	20	1228	20	1228	20	0.788274
FT-29_48	288.218	7270.01	5.20563	11.6782	0.513839	2.222	1.57516	0.1906	1.36411	0.80556		1124	28	1186	22	1325	20	1325	20	0.848302
FT-29_69	166.29	4758.46	1.28974	11.6279	0.872093	1.946	1.79856	0.1636	1.43643	0.64189		976	26	1095	25	1330	33	1330	33	0.733835	e
FT-29_19	222.195	25597.1	3.46589	11.5875	0.579374	2.014	1.6137	0.1691	1.38971	0.78659		1007	26	1119	22	1338	23	1338	23	0.752616
FT-29_71	188.479	10909.8	2.17677	11.5875	0.579374	2.439	1.51702	0.204	1.27451	0.51319		1197	27	1253	22	1339	23	1339	23	0.893951
FT-29_38	509.67	4866.87	1.12779	11.5234	0.460936	2.217	1.51105	0.1855	1.32075	0.80635		1096	26	1185	21	1353	18	1353	18	0.810052
FT-29_40	302.825	42560.6	1.31305	11.4051	0.49042	2.451	1.48919	0.2036	1.25246	0.57928		1195	27	1257	22	1373	19	1373	19	0.870357
FT-29_7	227.728	6088.56	1.22868	11.325	0.566251	2.189	1.62175	0.179	1.42458	0.78747		1061	28	1174	23	1382	23	1382	23	0.767728
FT-29_44	255.419	29762.8	5.37728	11.1982	0.531915	2.016	1.5625	0.1659	1.3261	0.79198		989	24	1119	21	1408	20	1408	20	0.702415
FT-29_63	115.362	2450.72	0.691333	11.1483	0.83612	1.921	1.87402	0.1557	1.57354	0.7651		932	28	1082	26	1410	31	1410	31	0.660993
FT-29_33	215.994	5337.66	3.15906	11.1173	0.522513	2.253	1.75322	0.1802	1.55383	0.91206		1067	31	1192	25	1421	20	1421	20	0.75088
FT-29_97	364.097	53593.4	3.30484	11.0779	0.481888	2.657	1.50546	0.2134	1.28866	0.69707		1246	29	1316	22	1428	18	1428	18	0.872549
FT-29_4	540.786	7447.99	2.82995	10.9457	0.443301	2.422	1.52766	0.1918	1.30344	0.83206		1131	27	1248	22	1452	17	1452	17	0.778926
FT-29_61	360.506	3019.13	4.31588	10.9051	0.539804	2.216	1.5343	0.1765	1.27479	0.63363		1047	25	1185	21	1458	21	1458	21	0.718107	e, f
FT-29_74	151.602	20294.2	4.08187	10.8814	0.598477	2.497	1.78214	0.1965	1.60305	0.88391		1154	34	1265	25	1461	22	1461	22	0.78987
FT-29_73	348.521	14411	1.89566	9.62835	0.447718	3.353	1.47629	0.2334	1.28535	0.72189		1352	31	1493	24	1692	16	1692	16	0.799054
FT-29_59	223.032	38396.8	0.637059	9.5511	0.472779	3.53	1.55807	0.2469	1.27582	0.70169		1422	33	1534	23	1707	18	1707	18	0.83304
FT-29_80	325.334	46799.7	3.45909	9.28764	0.455094	3.1	1.48387	0.2092	1.26673	0.66927		1224	28	1431	23	1759	16	1759	16	0.69585
FT-29_67	49.3009	547.707	0.654579	9.06618	1.85857	2.53	1.97628	0.1674	1.55317	-0.1174		997	29	1277	29	1763	62	1763	62	0.565513	e
FT-29_46	113.126	21899.1	2.84376	8.99281	0.539568	4.19	1.55131	0.2766	1.26537	0.47319		1574	35	1671	25	1815	20	1815	20	0.867218
FT-29_54	122.936	5728.51	2.15321	7.8064	0.546448	4.63	1.51188	0.2647	1.28447	0.48698		1513	34	1754	25	2070	19	2070	19	0.730918
FT-29_30	425.623	8650.9	1.70966	5.64016	0.423012	6	1.58333	0.2451	1.40759	0.93296		1414	35	1973	28	2626	14	2626	14	0.538462
FT-29_100	423.467	3850.87	2.56303	5.56483	0.417362	5.2	1.53846	0.2102	1.30828	0.88901		1230	30	1850	26	2649	13	2649	13	0.464326
FT-29_31	275.383	16907.3	1.28414	5.48246	0.411184	9.37	1.49413	0.3708	1.28101	0.82239		2032	45	2374	27	2673	13	2673	13	0.760195
FT-29_28	187.507	30394.1	1.51936	5.4615	0.409612	10.83	1.52355	0.43	1.27907	0.86701		2307	50	2508	28	2681	14	2681	14	0.8605
FT-29_25	234.32	2787.25	1.16344	5.03271	0.452944	7.82	1.59847	0.2867	1.39519	0.91135		1623	40	2206	30	2813	15	2813	15	0.576964	e
FT-29_58	761.065	2252.88	2.87981	4.56413	0.36513	7.62	1.5748	0.2543	1.39599	0.93006		1459	37	2184	30	2973	12	2973	12	0.49075	b
FT-29_12	469.375	7341.33	1.60568	4.25532	0.425532	9.39	1.70394	0.2869	1.42907	0.96417		1624	42	2371	33	3085	14	3085	14	0.526418	f
Sample FT-32 (accepted analyses = 52/125)
FT-32_75	19.3833	1781.6	2.44368	14.3678	1.6523	1.265	2.17391	0.1334	1.42429	0.25671		807	22	824	25	839	73	807	22	0.961859
FT-32_36	45.8257	483.777	1.98476	13.587	1.01902	1.685	1.72107	0.1679	1.34008	0.34724		1000	25	1000	22	1009	41	1009	41	0.99108
FT-32_108	76.0763	8975.1	2.47556	13.5318	0.879567	1.704	1.67254	0.1684	1.3361	0.34199		1003	25	1008	21	1022	37	1022	37	0.981409
FT-32_39	119.704	14562.4	1.66543	13.3511	0.734312	1.764	1.55896	0.1725	1.27536	0.33713		1026	24	1032	21	1054	29	1054	29	0.973435
FT-32_59	508.693	4138.22	1.2352	13.3565	0.467477	1.833	1.473	0.1775	1.26761	0.60754		1053	24	1058	19	1063	19	1063	19	0.990593
FT-32_68	95.1024	10822.6	1.82876	13.2802	0.796813	1.712	1.66472	0.1651	1.30224	0.40831		985	24	1011	21	1070	34	1070	34	0.920561
FT-32_123	364.637	43158.7	3.39979	13.3067	0.499002	1.773	1.49464	0.1702	1.26322	0.61941		1013	24	1035	19	1070	20	1070	20	0.946729
FT-32_111	28.3631	3653.6	3.70714	13.0719	1.24183	1.927	1.81629	0.1839	1.38662	0.24328		1088	28	1084	25	1071	51	1071	51	1.01587
FT-32_100	176.05	20635.5	2.35774	13.21	0.627477	1.76	1.53409	0.1683	1.27748	0.48343		1002	24	1030	20	1081	25	1081	25	0.92692
FT-32_16	58.4275	7691.7	0.96442	13.1062	0.917431	1.945	1.64524	0.1849	1.32504	0.27459		1093	26	1094	23	1082	39	1082	39	1.01017
FT-32_90	179.711	1757.45	2.37709	13.1062	0.720839	1.788	1.566	0.1694	1.26919	0.42519		1009	24	1040	21	1093	28	1093	28	0.923147
FT-32_43	125.681	16031.9	4.48984	13.089	0.719895	1.911	1.56986	0.1819	1.29192	0.44276		1077	25	1084	21	1097	28	1097	28	0.981768
FT-32_60	185.649	22732.7	5.93221	12.955	0.615365	1.895	1.53034	0.1781	1.29141	0.49173		1057	25	1078	21	1118	25	1118	25	0.945438
FT-32_65	259.885	33342.3	2.28484	12.9719	0.52536	1.978	1.49141	0.1864	1.26073	0.50989		1102	26	1107	20	1119	21	1119	21	0.984808
FT-32_10	409.263	54101	3.34374	12.9719	0.460501	1.958	1.50664	0.186	1.26344	0.76107		1099	26	1100	20	1120	18	1120	18	0.98125
FT-32_94	135.916	7169	4.47345	12.837	0.641849	1.958	1.55771	0.1814	1.29548	0.49701		1075	26	1100	21	1134	27	1134	27	0.947972
FT-32_56	142.675	18801.2	3.68568	12.8205	0.705128	2.053	1.55869	0.1905	1.28609	0.37987		1124	26	1131	21	1136	27	1136	27	0.989437
FT-32_41	50.6389	977.867	2.3594	12.6904	1.01523	1.935	1.75711	0.179	1.34078	0.36759		1061	26	1088	24	1144	42	1144	42	0.927448
FT-32_78	257.094	14021.9	2.23947	12.7698	0.542715	2.103	1.49786	0.195	1.28205	0.47357		1148	27	1149	21	1151	21	1151	21	0.997394
FT-32_11	122.653	2655	3.72671	12.6743	0.697085	2.183	1.58039	0.2024	1.28458	0.45847		1188	28	1173	22	1163	28	1163	28	1.0215
FT-32_9	23.1267	2995.4	1.39622	12.285	1.53563	2.01	2.08955	0.1818	1.45765	0.28616		1076	29	1107	28	1174	62	1174	62	0.916525	e
FT-32_37	44.4015	844.594	2.2727	12.4224	0.993789	2.3	1.73913	0.2083	1.34422	0.31771		1219	30	1208	24	1192	39	1192	39	1.02265
FT-32_91	623.924	5008.74	4.81899	12.3931	0.421366	2.327	1.46111	0.2081	1.2494	0.68601		1218	28	1220	21	1212	17	1212	17	1.00495
FT-32_62	47.7255	3953.88	2.84023	11.8064	1.00354	2.651	1.67861	0.2273	1.34184	0.2585		1320	32	1310	25	1289	39	1289	39	1.02405
FT-32_85	308.114	43677.8	4.61488	11.6036	0.487352	2.477	1.49374	0.2066	1.28267	0.61517		1211	28	1264	22	1339	19	1339	19	0.904406
FT-32_51	249.694	35880	1.13563	11.3572	0.511073	2.86	1.48601	0.2351	1.25479	0.5324		1361	31	1370	22	1379	20	1379	20	0.986947
FT-32_119	97.55	3016.18	1.47452	11.3122	0.678733	2.824	1.57578	0.2311	1.29814	0.43337		1340	31	1359	24	1381	27	1381	27	0.970311
FT-32_93	56.7543	2374.93	1.50851	11.0375	0.93819	2.97	1.6835	0.2368	1.30912	0.42886		1369	32	1395	26	1419	35	1419	35	0.964764	e
FT-32_103	198.939	33045	1.65292	11.0644	0.525559	2.962	1.48548	0.2379	1.26103	0.46868		1376	31	1397	23	1431	20	1431	20	0.961565
FT-32_53	277.063	24020.8	5.68476	11.0363	0.474561	3.079	1.46151	0.2453	1.26376	0.54614		1414	32	1427	23	1436	18	1436	18	0.98468
FT-32_17	121.218	22204.1	2.27022	10.846	0.596529	3.29	1.51976	0.2564	1.28705	0.50004		1471	34	1476	24	1470	22	1470	22	1.00068
FT-32_61	37.8966	4188.59	3.98005	9.23361	0.831025	4.63	1.61987	0.3118	1.34702	0.46308		1748	41	1751	28	1759	31	1759	31	0.993746
FT-32_38	156.032	34411.9	2.2321	9.28505	0.510678	4.62	1.51515	0.3129	1.26238	0.50692		1755	39	1751	25	1759	18	1759	18	0.997726
FT-32_49	175.957	16022.1	2.36933	9.25069	0.508788	4.7	1.48936	0.3136	1.27551	0.58523		1758	39	1765	25	1765	18	1765	18	0.996034
FT-32_34	95.0495	19333.3	2.05837	9.22509	0.553506	4.34	1.84332	0.2916	1.6118	0.91762		1645	48	1695	32	1768	20	1768	20	0.93043
FT-32_58	410.048	87510.5	5.72637	9.24385	0.397486	4.6	1.41304	0.308	1.25	0.76733		1730	38	1749	24	1768	14	1768	14	0.978507
FT-32_12	534.005	21159.4	6.21342	9.23191	0.38774	4.45	1.46067	0.2995	1.28548	0.86969		1688	38	1721	25	1770	14	1770	14	0.953672
FT-32_45	549.711	8558.5	3.27174	9.23276	0.415474	4.49	1.44766	0.3004	1.26498	0.66899		1693	37	1727	24	1770	15	1770	15	0.956497
FT-32_32	387.701	12264.3	3.10386	9.22679	0.415206	4.42	1.47059	0.296	1.26689	0.6831		1671	37	1715	24	1771	15	1771	15	0.943535
FT-32_105	259.184	56657.6	1.18901	9.20217	0.441704	4.67	1.49893	0.312	1.28205	0.77474		1750	39	1759	25	1775	16	1775	16	0.985915
FT-32_54	232.082	7358.07	5.10731	9.1617	0.426019	4.85	1.4433	0.3211	1.26129	0.62581		1795	40	1792	25	1783	16	1783	16	1.00673
FT-32_8	252.285	55953.2	4.06519	9.15667	0.444099	4.63	1.51188	0.3103	1.27296	0.69131		1741	39	1755	24	1786	16	1786	16	0.974804
FT-32_28	113.634	25831.6	2.58534	8.86525	0.531915	5.05	1.48515	0.321	1.27726	0.51901		1794	40	1826	26	1841	20	1841	20	0.97447
FT-32_80	134.198	4667.66	1.33294	8.78735	0.483304	5.15	1.45631	0.3275	1.28244	0.61241		1826	41	1843	25	1859	18	1859	18	0.982249
FT-32_33	256.381	14541.7	2.02234	8.75503	0.424619	5.16	1.45349	0.3287	1.26255	0.71648		1832	40	1845	25	1866	15	1866	15	0.981779
FT-32_120	64.0242	6113.83	1.09412	8.70322	0.652742	5.19	1.54143	0.3255	1.30568	0.5467		1815	41	1847	27	1871	23	1871	23	0.970069
FT-32_112	123.37	29047.3	3.17112	8.67303	0.520382	5.3	1.50943	0.3346	1.30006	0.6524		1860	42	1868	25	1881	19	1881	19	0.988836
FT-32_57	695.605	4917.2	2.86341	8.61623	0.392039	5.22	1.43678	0.3256	1.25921	0.74756		1817	40	1854	25	1896	14	1896	14	0.958333
FT-32_1	247.404	81505.7	0.891155	5.70125	0.399088	11.29	1.46147	0.464	1.2931	0.81622		2457	52	2546	27	2608	13	2608	13	0.942101
FT-32_69	214.991	15925.6	1.62372	5.35906	0.401929	12.85	1.43969	0.502	1.29482	0.74788		2621	54	2668	27	2711	13	2711	13	0.966802
FT-32_24	55.9891	20399.7	1.29312	5.34188	0.507479	13.52	1.51627	0.513	1.26706	0.6511		2668	56	2715	29	2715	16	2715	16	0.982689
FT-32_70	99.2839	5526.66	3.15637	5.30223	0.450689	12.76	1.48903	0.492	1.32114	0.71696		2580	54	2661	28	2729	15	2729	15	0.945401
Sample FT-32 (rejected analyses = 73/125)
FT-32_106	842.725	1188.01	14.5344	14.6628	0.733138	0.331	2.41692	0.0351	1.9943	0.94164		222.1	8.6	288	12	862	31	222.1	8.6	0.257657	f
FT-32_110	989.089	445.77	12.3004	11.2867	0.564334	0.451	1.55211	0.03733	1.29922	0.70495		236.2	6	377.7	9.7	1390	22	236.2	6	0.169928
FT-32_7	1263.96	1110.65	6.8017	11.0607	0.503263	0.671	1.78838	0.0541	1.47874	0.93984		339.7	9.9	519	14	1430	19	339.7	9.9	0.237552	e
FT-32_50	1872.91	1201.11	0.521423	10.7411	0.477981	0.844	1.54028	0.0655	1.37405	0.88218		410	11	620	14	1488	18	410	11	0.275538	e, f
FT-32_6	1269.39	997.529	5.58246	10.3413	0.620476	0.919	2.50272	0.0684	2.11988	0.98683		426	18	650	26	1553	24	426	18	0.274308	f
FT-32_5	357.501	10421.7	0.879565	13.6911	0.636637	0.837	2.15054	0.0829	1.86972	0.93341		513	18	611	19	1011	26	513	18	0.507418
FT-32_26	1805.21	1616.65	3.72591	12.4984	0.412448	0.953	1.57398	0.0848	1.41509	0.93301		524	14	678	16	1195	16	524	14	0.438494
FT-32_101	1975.99	1698.1	2.74849	9.91375	0.39655	1.217	1.56122	0.0873	1.37457	0.9388		540	14	808	17	1639	15	540	14	0.329469
FT-32_46	1512.25	1781.96	2.17001	12.87	0.418275	1.003	1.54536	0.0935	1.3369	0.88704		576	15	706	16	1137	17	576	15	0.506596
FT-32_122	74.0616	2182.03	3.04828	14.0647	1.26582	0.963	1.86916	0.0983	1.42421	0.35424		604	16	682	19	926	49	604	16	0.652268	e
FT-32_88	209.538	13823.2	8.85966	5.95238	0.595238	2.297	2.02438	0.0986	1.77485	0.93509		605	21	1202	29	2532	20	605	21	0.238942
FT-32_71	667.705	904.874	2.92511	10.2564	0.471795	1.396	1.5043	0.1046	1.29063	0.67759		641	16	887	18	1574	18	641	16	0.407243
FT-32_97	899.148	1994.38	1.72347	13.1857	0.461498	1.105	1.53846	0.1052	1.3308	0.84371		645	16	754	17	1088	19	645	16	0.592831
FT-32_20	1115.22	1391.16	4.58025	9.32314	0.438188	1.632	1.89951	0.1084	1.66052	0.97815		662	21	975	25	1751	16	662	21	0.37807	e
FT-32_19	647.792	1132.98	3.00081	9.76944	0.468933	1.565	1.5655	0.1095	1.36986	0.85447		670	17	955	19	1664	17	670	17	0.402644
FT-32_67	551.513	1558.32	1.00156	12.1951	0.609756	1.24	1.81452	0.1104	1.53986	0.66347		675	20	815	20	1234	22	675	20	0.547002	e
FT-32_3	815.108	1577.21	8.49931	9.7371	0.486855	1.658	2.35223	0.1166	2.1012	0.98317		708	29	977	31	1671	19	708	29	0.423698
FT-32_92	286.021	23757	4.34256	13.5851	0.645293	1.229	1.58666	0.1208	1.3245	0.65111		735	18	814	18	1024	26	735	18	0.717773
FT-32_14	890.744	1704.2	7.24755	9.78857	0.435591	1.799	2.0289	0.1275	1.80392	0.98272		772	27	1035	27	1663	16	772	27	0.464221
FT-32_115	1270.87	1293.85	4.17127	6.40205	0.384123	2.825	1.45133	0.131	1.25954	0.79831		794	19	1362	22	2414	13	794	19	0.328915
FT-32_40	931.572	1467.4	4.30506	9.74374	0.418981	1.854	1.61812	0.1318	1.40364	0.93901		798	21	1062	22	1672	15	798	21	0.477273
FT-32_82	186.599	16516.6	3.09623	12.87	0.707851	1.425	1.68421	0.1323	1.36054	0.65436		801	21	897	20	1126	29	801	21	0.711368
FT-32_125	697.094	1087.78	3.96182	9.51384	0.437637	1.946	1.49024	0.1334	1.27436	0.75262		807	19	1096	20	1715	16	807	19	0.470554
FT-32_55	1004.32	1995.73	3.62513	5.13347	0.38501	3.71	1.61725	0.1374	1.41921	0.95865		830	22	1571	26	2782	13	830	22	0.298347
FT-32_117	322.137	15067.6	2.08047	11.655	0.553613	1.641	2.31566	0.1381	2.17234	0.96349		831	34	972	29	1328	22	831	34	0.625753
FT-32_116	536.418	13211	4.5136	10.0271	0.456232	1.909	1.49293	0.1385	1.29964	0.7763		836	20	1084	20	1616	17	836	20	0.517327
FT-32_29	41.4739	2021.24	1.96938	13.21	1.25495	1.478	1.82679	0.1406	1.38691	0.17859		848	22	916	22	1054	50	848	22	0.804554
FT-32_63	212.109	20775.6	0.351044	12.1109	0.593436	1.636	1.6198	0.1442	1.42164	0.77707		868	23	982	20	1254	23	868	23	0.692185
FT-32_77	1065.08	1930.22	1.75563	10.1	0.39895	1.97	1.54822	0.1445	1.34948	0.91158		870	22	1104	21	1606	15	870	22	0.541719
FT-32_81	151.478	14844.9	4.94091	9.09918	0.682439	2.29	2.62009	0.1492	2.27882	0.95552		892	37	1187	34	1792	24	892	37	0.497768
FT-32_42	17.6634	269.22	1.12937	13.2979	1.59574	1.843	2.14324	0.1794	1.47715	0.31957		1063	29	1051	29	1007	68	1007	68	1.05561
FT-32_27	270.339	7549.17	2.08791	13.1268	0.564453	1.702	1.52761	0.1594	1.28607	0.54055		953	23	1008	19	1096	23	1096	23	0.869526
FT-32_44	67.3516	7693.1	2.55506	12.8866	0.966495	1.743	1.72117	0.1636	1.28362	0.35158		976	23	1022	22	1115	38	1115	38	0.875336
FT-32_118	132.648	3039.96	1.68217	12.87	0.707851	1.731	1.55979	0.1609	1.30516	0.46225		962	23	1019	21	1135	27	1135	27	0.847577	e
FT-32_124	106.189	1324.37	1.8246	12.7551	0.765306	1.771	1.60926	0.1636	1.31418	0.34965		976	24	1032	21	1147	31	1147	31	0.850915
FT-32_84	108.351	5440.83	1.74471	12.6103	0.75662	1.666	1.71068	0.1518	1.44928	0.71239		910	25	994	21	1167	29	1167	29	0.779777
FT-32_87	275.103	2803.98	2.41955	12.5992	0.529167	1.871	1.54997	0.17	1.35294	0.77442		1012	25	1069	21	1178	21	1178	21	0.859083
FT-32_109	66.1711	7867.4	1.45043	12.0048	0.840336	1.944	1.64609	0.1698	1.32509	0.45537		1011	25	1093	22	1267	34	1267	34	0.797948
FT-32_23	223.911	7923.71	2.06968	11.7247	0.539336	2.052	1.55945	0.1707	1.34739	0.77158		1015	25	1132	22	1317	21	1317	21	0.770691
FT-32_89	136.724	14985.6	1.20747	11.6959	0.701754	1.938	1.93498	0.1632	1.68505	0.87684		972	31	1085	27	1318	27	1318	27	0.737481
FT-32_96	246.023	31770	3.42195	11.5009	0.523289	2.25	1.55556	0.1867	1.33905	0.78715		1104	27	1195	22	1355	20	1355	20	0.81476
FT-32_99	331.755	35203.8	3.40157	11.4745	0.458979	2.317	1.55373	0.1921	1.32743	0.82033		1132	28	1216	22	1361	18	1361	18	0.831741
FT-32_102	480.253	54274.7	2.54959	11.1383	0.473379	2.007	1.49477	0.1624	1.2931	0.66279		970	23	1118	20	1419	18	1419	18	0.68358
FT-32_74	254.516	33616.4	3.31144	11.0351	0.507614	2.406	1.66251	0.1939	1.46983	0.89953		1141	31	1242	25	1435	20	1435	20	0.795122
FT-32_83	409.048	57515.4	0.970297	10.9325	0.464633	2.602	1.51806	0.2046	1.29521	0.76549		1201	29	1300	22	1453	18	1453	18	0.826566
FT-32_13	98.7157	5347.68	1.92567	10.0806	0.856855	3.15	1.74603	0.2293	1.35194	0.66258		1332	32	1440	28	1605	34	1605	34	0.829907	e, f
FT-32_64	703.217	2463.94	5.40073	9.64506	0.41956	2.706	1.53363	0.1896	1.31857	0.87691		1119	27	1328	23	1689	16	1689	16	0.662522
FT-32_21	616.936	1757.38	2.88188	9.60707	0.422711	2.583	1.52923	0.1766	1.33069	0.87283		1048	26	1294	22	1696	16	1696	16	0.617925
FT-32_22	364.875	49967	2.04306	9.49668	0.465337	2.874	1.53097	0.1941	1.33952	0.81707		1143	28	1374	23	1717	17	1717	17	0.665696
FT-32_72	928.987	2251.56	4.63379	9.48047	0.40766	2.398	1.73061	0.1656	1.53986	0.96224		987	28	1237	24	1722	15	1722	15	0.573171
FT-32_30	1010.42	2881.84	5.99027	9.44465	0.387231	2.929	1.46808	0.1991	1.25565	0.75288		1170	27	1389	22	1728	14	1728	14	0.677083
FT-32_114	706.317	1656.48	4.46097	9.43485	0.405699	2.588	1.52628	0.1773	1.32544	0.89352		1053	25	1296	22	1731	15	1731	15	0.608319
FT-32_73	844.261	2317.79	4.23494	9.41442	0.395406	2.546	1.51218	0.1747	1.31654	0.89009		1038	25	1284	22	1735	14	1735	14	0.598271
FT-32_35	459.503	28565.9	2.06687	9.3668	0.416823	3.75	1.46667	0.2559	1.27003	0.70559		1469	33	1582	24	1744	15	1744	15	0.842317
FT-32_15	682.281	4712.16	11.8951	9.34754	0.397271	3.31	1.51057	0.2237	1.38578	0.94207		1300	33	1481	25	1747	15	1747	15	0.744133
FT-32_48	483.859	7881.37	0.529697	9.32488	0.41962	3.25	1.84615	0.2189	1.62175	0.97151		1276	37	1462	30	1751	15	1751	15	0.728726
FT-32_18	500.022	4224.17	4.32604	9.27816	0.426795	3.021	1.52267	0.2012	1.3171	0.86925		1181	29	1412	23	1760	16	1760	16	0.671023
FT-32_25	786.694	3511.19	5.13524	9.27472	0.380263	3.76	1.46277	0.2481	1.2898	0.89089		1428	33	1583	24	1762	14	1762	14	0.810443
FT-32_66	142.862	1806.76	2.18088	9.21659	0.552995	4.06	1.47783	0.2722	1.28582	0.51986		1552	35	1645	24	1770	20	1770	20	0.876836
FT-32_4	14.629	2321.6	2.15431	9.01713	1.53291	3.56	2.38764	0.2361	1.86362	0.61674		1361	46	1528	40	1774	58	1774	58	0.767193
FT-32_104	951.617	2919.06	0.831924	9.1954	0.404598	3.7	1.75676	0.2488	1.62781	0.9843		1436	40	1573	27	1777	15	1777	15	0.808104
FT-32_107	879.714	1709.95	0.295765	9.07853	0.399455	2.64	1.89394	0.1747	1.77447	0.98214		1035	34	1302	27	1800	15	1800	15	0.575
FT-32_47	438.35	10401.3	3.67447	9.00252	0.432121	3.89	1.54242	0.2532	1.34281	0.88992		1454	35	1608	26	1815	16	1815	16	0.801102
FT-32_31	392.897	15972.1	2.52837	8.87705	0.42166	4.33	1.50115	0.2783	1.2756	0.69666		1582	36	1698	24	1843	15	1843	15	0.858383
FT-32_121	493.545	9335.35	1.78952	7.72201	0.3861	5.76	1.47569	0.3204	1.32647	0.9193		1790	42	1937	26	2090	14	2090	14	0.856459
FT-32_95	609.51	4537.53	3.73054	7.38007	0.405904	4.64	1.50862	0.2471	1.33549	0.90389		1423	34	1754	26	2169	14	2169	14	0.656063
FT-32_86	691.014	3980.55	2.37837	6.70691	0.36888	5.34	1.68539	0.2575	1.47573	0.96672		1475	39	1869	29	2334	13	2334	13	0.631962
FT-32_79	778.932	1329.94	2.37102	5.91716	0.384615	4.56	1.53509	0.1953	1.33129	0.91603		1150	28	1740	26	2547	13	2547	13	0.451512
FT-32_2	503.954	21474.9	2.50557	5.86854	0.381455	6.11	1.71849	0.2596	1.57935	0.97918		1485	42	1985	31	2561	13	2561	13	0.579852
FT-32_52	254.595	14867.1	2.34279	5.63063	0.563063	9.7	2.47423	0.389	2.18509	0.99019		2102	80	2360	54	2628	19	2628	19	0.799848	g
FT-32_76	702.133	6023.05	3.4255	5.37924	0.376547	11.08	1.44404	0.433	1.27021	0.83775		2320	49	2529	27	2706	12	2706	12	0.857354
FT-32_98	320.061	97579.5	3.83707	5.35619	0.374933	11.34	1.45503	0.438	1.25571	0.82436		2343	50	2551	27	2713	12	2713	12	0.86362
FT-32_113	216.139	2878.06	1.17918	3.54736	0.425683	10.65	1.78404	0.2739	1.56992	0.96642		1558	43	2482	33	3372	13	3372	13	0.46204
Sample FT-1 (accepted analyses = 77/110)
FT-1_95	116.883	13188.8	6.46002	13.7931	1.10345	1.501	2.53165	0.1502	2.36352	0.93048		898	40	913	35	988	44	898	40	0.908907	c
FT-1_100	231.226	8668.98	3.43637	14.0056	0.840336	1.559	1.53945	0.159	1.3522	0.44977		951	24	954	19	967	33	967	33	0.983454
FT-1_25	646.226	3326	6.48648	13.8696	0.762829	1.565	1.5016	0.1568	1.37117	0.73593		939	24	956	19	986	31	986	31	0.952333
FT-1_27	53.7556	7288.2	0.822617	13.624	1.22616	1.67	1.73653	0.1644	1.39903	0.1781		982	26	993	22	999	50	999	50	0.982983
FT-1_48	88.9381	12748.7	3.34214	13.7174	0.960219	1.76	1.61932	0.1753	1.3976	0.38679		1042	27	1029	21	1005	39	1005	39	1.03682
FT-1_92	76.7001	11016.3	3.74324	13.6426	1.02319	1.773	1.60745	0.1765	1.3881	0.33447		1048	27	1034	21	1015	39	1015	39	1.03251
FT-1_42	224.438	30924.3	5.65532	13.6612	0.819672	1.741	1.55083	0.1729	1.38809	0.52369		1028	26	1023	20	1016	34	1016	34	1.01181
FT-1_78	111.558	2050.38	2.07352	13.6054	0.952381	1.696	1.62146	0.1684	1.39549	0.38237		1003	26	1005	21	1017	38	1017	38	0.986234
FT-1_71	74.9542	10774.9	1.17673	13.587	1.01902	1.782	1.65544	0.1764	1.38889	0.30427		1047	27	1036	21	1020	42	1020	42	1.02647
FT-1_20	130.688	1898.67	2.80844	13.587	0.883152	1.77	1.58192	0.1736	1.38249	0.36233		1032	26	1033	20	1022	37	1022	37	1.00978
FT-1_41	178.49	25237.3	3.74198	13.5135	0.810811	1.764	1.55896	0.1729	1.35917	0.50168		1028	26	1031	20	1035	34	1035	34	0.993237
FT-1_37	131.291	19123.5	3.51693	13.4409	0.873656	1.8	1.55556	0.1757	1.36596	0.42339		1043	26	1044	20	1046	35	1046	35	0.997132
FT-1_58	163.11	24051.8	2.89363	13.3511	0.867824	1.842	1.54723	0.1786	1.37178	0.41671		1059	27	1059	20	1061	34	1061	34	0.998115
FT-1_76	100.518	14956.7	2.21873	13.369	0.935829	1.902	1.60358	0.1857	1.40011	0.43131		1098	28	1081	22	1061	39	1061	39	1.03487
FT-1_21	365.128	9446.53	2.52938	13.369	0.802139	1.737	1.52562	0.1675	1.37313	0.61098		998	25	1021	20	1063	31	1063	31	0.938852
FT-1_72	303.349	4942.24	3.70596	13.2979	0.797872	1.758	1.50739	0.1707	1.37668	0.52691		1016	26	1029	20	1071	32	1071	32	0.948646
FT-1_96	47.5458	5919.1	1.86699	13.0548	1.50131	1.73	2.89017	0.1635	2.38532	0.84217		973	44	1008	37	1078	60	1078	60	0.902597	c
FT-1_13	296.982	30514.2	4.11315	13.245	0.794702	1.776	1.57658	0.1701	1.41093	0.762		1012	26	1035	20	1078	32	1078	32	0.938776
FT-1_81	205.47	28959.2	4.5985	13.2275	0.859788	1.8	1.52778	0.1744	1.37615	0.46446		1036	26	1044	20	1078	33	1078	33	0.961039
FT-1_110	3.64655	534.5	2.54255	11.9332	3.40095	2.12	3.77358	0.1856	2.20905	0.32393		1096	45	1114	51	1080	140	1080	140	1.01481
FT-1_80	87.0761	13354.7	2.87505	13.1234	0.984252	1.984	1.6129	0.1905	1.39108	0.28162		1124	29	1109	21	1087	40	1087	40	1.03404
FT-1_34	60.4949	9625.2	2.71749	12.9199	1.03359	2.049	1.63494	0.1926	1.40187	0.33648		1135	29	1131	22	1114	41	1114	41	1.01885
FT-1_74	288.423	4489.99	3.63586	12.9534	0.841969	1.874	1.52081	0.1772	1.38262	0.53707		1051	27	1072	20	1125	33	1125	33	0.934222
FT-1_94	28.9909	4469.7	2.22273	12.7226	1.39949	2.064	1.91376	0.1918	1.45985	0.23598		1131	30	1129	26	1130	56	1130	56	1.00088
FT-1_83	76.3564	11473.5	1.468	12.7226	1.01781	1.989	1.63399	0.185	1.37838	0.35026		1094	28	1110	22	1151	40	1151	40	0.950478
FT-1_66	133.24	21524.6	2.49277	12.7065	0.889454	2.07	1.54589	0.1915	1.38381	0.079285		1129	29	1137	21	1157	34	1157	34	0.975799
FT-1_24	54.6894	8461.8	2.62692	12.6582	1.13924	2.05	1.73171	0.1865	1.3941	0.31302		1102	28	1128	23	1158	45	1158	45	0.951641
FT-1_52	124.011	19580.1	2.90121	12.7389	0.828025	2.111	1.56324	0.195	1.38462	0.45415		1148	29	1151	22	1158	34	1158	34	0.991364
FT-1_70	102.598	16536.4	1.80312	12.6582	0.949367	2.121	1.62659	0.1957	1.37966	0.49835		1153	30	1153	22	1161	37	1161	37	0.993109
FT-1_16	348.199	6234.75	11.0158	12.6743	0.760456	2.013	1.51515	0.1844	1.38286	0.67947		1091	28	1119	21	1166	31	1166	31	0.935678
FT-1_73	104.321	1805.47	2.15348	12.6263	0.94697	2.13	1.59624	0.1973	1.39382	0.36422		1161	30	1157	22	1166	38	1166	38	0.995712
FT-1_64	69.3738	3310.24	1.97762	12.5945	1.1335	2.009	1.69238	0.1835	1.41689	0.19434		1086	28	1115	23	1168	45	1168	45	0.929795	e
FT-1_99	253.266	18464.8	2.92687	12.5628	0.816583	2.053	1.53434	0.188	1.35638	0.45621		1110	28	1132	21	1183	32	1183	32	0.938292
FT-1_79	69.5451	10615.7	2.89187	12.5156	1.00125	2.051	1.70648	0.1879	1.49015	0.59518		1109	31	1129	23	1184	39	1184	39	0.936655
FT-1_14	89.765	2272.35	2.90459	12.3457	1.04938	2.11	2.8436	0.1862	2.49731	0.94249		1093	51	1120	42	1207	42	1207	42	0.905551	e, f, i
FT-1_36	57.1867	10012.4	1.71541	12.3762	0.990099	2.381	1.63797	0.2133	1.40647	0.35347		1246	32	1236	24	1212	41	1212	41	1.02805
FT-1_15	243.628	41045.3	2.08387	12.3001	0.799508	2.323	1.50667	0.2063	1.35725	0.47122		1209	30	1218	22	1227	32	1227	32	0.98533
FT-1_28	275.927	45435	4.86622	12.1803	0.791717	2.287	1.53039	0.2007	1.3702	0.65521		1179	29	1207	22	1247	30	1247	30	0.945469
FT-1_38	48.196	7961.7	2.28839	12.0627	1.14596	2.36	1.92797	0.2076	1.54143	0.70426		1217	33	1228	27	1252	46	1252	46	0.972045	e
FT-1_91	228.968	15380.9	3.06491	12.1065	0.786925	2.357	1.50615	0.2085	1.36691	0.50604		1221	30	1229	21	1258	31	1258	31	0.970588
FT-1_103	33.0852	1888.95	2.10492	11.9332	1.13365	2.398	1.81401	0.2084	1.53551	0.55596		1219	34	1237	27	1266	45	1266	45	0.962875
FT-1_12	334.538	6406.66	2.6337	11.9904	0.779376	2.477	1.51393	0.2147	1.37401	0.61296		1254	31	1265	22	1278	30	1278	30	0.981221
FT-1_67	16.9505	3044.2	2.70771	11.6144	1.4518	2.57	1.94553	0.2179	1.5374	0.37526		1269	36	1284	29	1296	57	1296	57	0.979167
FT-1_97	33.6485	6087.2	1.15035	11.8343	1.12426	2.536	1.7153	0.2184	1.4652	0.42488		1273	34	1277	25	1297	43	1297	43	0.981496
FT-1_26	24.1871	4643.9	1.83895	11.6144	1.21951	2.786	1.75879	0.2349	1.46871	0.33554		1359	36	1347	27	1318	48	1318	48	1.03111
FT-1_69	224.246	41025.9	3.76783	11.7371	0.821596	2.6	1.51923	0.2223	1.37202	0.60194		1294	32	1300	22	1319	30	1319	30	0.981046
FT-1_109	7.78742	1333.2	1.20755	11.2108	2.07399	2.64	2.46212	0.2168	1.75277	0.25523		1262	40	1293	36	1321	85	1321	85	0.955337
FT-1_35	25.4624	754.829	1.32007	11.5473	1.32794	2.77	2.34657	0.2295	1.87364	0.74759		1334	46	1332	36	1325	53	1325	53	1.00679
FT-1_49	66.6401	10585.7	5.40522	11.6144	0.987224	2.678	1.62435	0.2265	1.43488	0.48797		1316	34	1319	24	1332	38	1332	38	0.987988
FT-1_61	69.4014	12285.1	1.24805	11.5473	0.981524	2.597	1.6365	0.2181	1.44429	0.46441		1271	33	1298	24	1341	38	1341	38	0.9478	e
FT-1_107	6.17594	1096.2	1.93686	10.9051	2.23555	2.76	2.53623	0.2228	1.8851	0.26345		1293	44	1321	38	1341	90	1341	90	0.964206
FT-1_77	62.3669	12202.2	2.74009	11.4811	0.97589	2.884	1.61234	0.2422	1.4038	0.39307		1398	35	1375	24	1350	38	1350	38	1.03556
FT-1_90	86.6754	16865.6	2.22014	11.3766	0.910125	2.892	1.57331	0.2408	1.3912	0.38052		1391	35	1379	23	1373	35	1373	35	1.01311
FT-1_45	178.615	33474.8	1.73105	11.2867	0.846501	2.856	1.54062	0.2336	1.36986	0.53973		1353	33	1369	23	1392	32	1392	32	0.971983
FT-1_33	62.9457	12712.2	3.57299	11.1857	0.950783	3.053	1.60498	0.2471	1.3962	0.40755		1423	36	1418	25	1407	37	1407	37	1.01137
FT-1_101	23.585	4828.7	1.93456	10.8578	1.24864	3.18	1.88679	0.2508	1.61483	0.60633		1440	42	1441	30	1449	47	1449	47	0.993789
FT-1_44	83.3696	17138.1	1.75861	10.9051	0.87241	3.19	1.5674	0.2517	1.39054	0.41481		1448	36	1452	24	1458	34	1458	34	0.993141
FT-1_29	46.9101	805.317	1.75915	10.7411	1.18153	3.23	1.85759	0.2515	1.63022	0.66623		1444	43	1464	30	1471	45	1471	45	0.981645	c, e
FT-1_84	249.065	49911.5	1.77678	10.8225	0.757576	3.13	1.51757	0.2478	1.37207	0.59846		1428	35	1440	23	1473	30	1473	30	0.96945
FT-1_62	50.5314	10365.9	2.11681	10.7643	0.968784	3.17	1.57729	0.2478	1.41243	0.47508		1426	36	1448	25	1474	37	1474	37	0.967436	e
FT-1_46	140.495	7221.02	2.84738	10.8225	0.811688	3.043	1.54453	0.2384	1.36326	0.52185		1378	34	1418	23	1475	32	1475	32	0.934237
FT-1_59	39.0427	1274.26	2.9284	10.3093	1.13402	3.32	1.80723	0.2491	1.42513	0.39722		1433	37	1482	27	1551	43	1551	43	0.92392	e
FT-1_75	205.223	9568.96	1.98296	10.352	0.828157	3.25	1.53846	0.2457	1.44485	0.73456		1416	37	1467	25	1555	31	1555	31	0.910611
FT-1_19	47.2843	6435.48	2.06467	9.85222	0.935961	4.06	1.60099	0.2877	1.40772	0.43628		1629	40	1643	26	1647	36	1647	36	0.989071
FT-1_22	116.028	6872.94	0.924759	9.68054	0.822846	4.04	1.48515	0.2821	1.38249	0.65853		1602	39	1640	25	1680	30	1680	30	0.953571	e
FT-1_60	224.395	54596.9	3.36511	9.28505	0.742804	4.33	1.61663	0.292	1.42123	0.89867		1653	41	1697	27	1759	28	1759	28	0.939738
FT-1_32	111.831	27431.5	0.92824	9.23361	0.831025	4.45	1.57303	0.2974	1.37861	0.52357		1679	41	1721	25	1766	30	1766	30	0.950736
FT-1_40	213.392	15994.6	2.80258	9.22509	0.738007	4.9	1.63265	0.329	1.51976	0.92605		1830	48	1799	27	1771	28	1771	28	1.03331
FT-1_57	159.842	37598.1	3.16212	9.19963	0.781969	4.29	1.6317	0.2856	1.41807	0.83673		1618	41	1688	27	1775	28	1775	28	0.911549
FT-1_53	96.2601	23057.2	1.01219	9.17431	0.917431	4.64	1.61638	0.309	1.44013	0.56589		1735	44	1755	27	1778	34	1778	34	0.975816	a
FT-1_10	111.157	29603.3	3.38993	8.92061	0.802855	5.04	1.5873	0.3261	1.37994	0.6786		1819	44	1825	26	1831	29	1831	29	0.993446
FT-1_3	189.939	50100.4	3.74815	8.90472	0.756901	4.96	1.5121	0.3212	1.36986	0.6688		1795	43	1812	25	1835	28	1835	28	0.978202
FT-1_8	145.702	36985.2	2.44777	8.83392	0.795053	4.82	1.55602	0.3092	1.42303	0.87495		1736	44	1787	26	1851	28	1851	28	0.937871
FT-1_43	132.819	3938.52	1.37692	5.64972	0.762712	10.88	1.51654	0.446	1.34529	0.70137		2377	55	2513	29	2623	26	2623	26	0.906214	a
FT-1_30	146.761	3059.73	1.52492	5.4615	0.76461	11.55	1.55844	0.456	1.42544	0.83491		2419	58	2566	29	2679	25	2679	25	0.902949	e
FT-1_56	158.886	63083.2	1.54993	5.43478	0.733696	12.24	1.47059	0.483	1.34576	0.75308		2539	57	2622	28	2688	24	2688	24	0.944568
FT-1_6	58.9533	23884.4	0.963396	5.42888	0.814332	12.59	1.50913	0.497	1.40845	0.68982		2602	59	2648	28	2689	26	2689	26	0.967646
Sample FT-1 (rejected analyses = 33/110)
FT-1_1	1170.44	1419.03	4.2052	14.4509	0.794798	0.598	1.50502	0.063	1.34921	0.70493		394	11	476	12	902	32	394	11	0.436807	b
FT-1_47	655.007	507.318	4.13308	6.41849	0.962773	1.544	2.78497	0.0709	2.53879	0.97552		440	21	923	35	2402	33	440	21	0.183181	b, e
FT-1_54	295.151	16851.6	5.85476	13.0548	1.24021	1.06	6.13208	0.093	5.37634	0.99145		562	59	646	57	1087	54	562	59	0.517019	e, g, i
FT-1_63	383.061	959.386	1.39362	9.13242	0.86758	1.49	3.3557	0.098	3.36735	0.9882		597	38	886	42	1785	32	597	38	0.334454	e, i
FT-1_11	371.557	34701.2	4.92105	13.6799	0.889193	1.186	2.02361	0.1167	1.84233	0.85654		711	25	790	23	1014	35	711	25	0.701183	c
FT-1_7	753.373	1269.37	2.49857	7.34754	0.734754	2.214	1.53568	0.1181	1.39712	0.8535		719	19	1186	21	2176	26	719	19	0.330423	b
FT-1_17	227.785	24545	2.00064	11.5875	0.869061	1.61	3.10559	0.1355	3.13653	0.98488		811	48	943	39	1343	34	811	48	0.603872	e, i
FT-1_50	183.485	5329.5	2.69747	11.8906	1.0107	1.62	4.01235	0.137	3.64964	0.97795		815	57	917	51	1282	40	815	57	0.635725	f, i
FT-1_39	306.263	25005.4	4.0254	11.4025	1.08324	1.73	5.78035	0.139	5.39568	0.99103		819	85	933	77	1365	43	819	85	0.6	c, g, i
FT-1_104	9.59899	548.007	1.74182	8.73362	3.71179	2.29	3.93013	0.1475	2.81356	0.43608		883	46	1171	57	1750	130	883	46	0.504571	c, e
FT-1_102	9.51746	1494	2.0773	13.7552	2.13205	1.863	2.4423	0.1888	1.7214	0.27592		1117	36	1058	34	907	88	907	88	1.23153
FT-1_105	5.93559	985.7	2.17991	12.6582	2.59494	2.23	3.13901	0.2084	2.06334	0.38912		1215	46	1156	43	1020	100	1020	100	1.19118	e
FT-1_85	84.6845	2434.07	2.54049	12.7389	0.955414	1.738	1.63982	0.1615	1.39319	0.44428		965	25	1020	21	1155	40	1155	40	0.835498
FT-1_55	221.768	5590.67	4.84646	12.5313	0.814536	1.96	1.53061	0.1781	1.37563	0.58019		1056	27	1101	21	1187	32	1187	32	0.889638
FT-1_4	48.0868	7709	2.40053	11.6959	1.16959	2.351	1.68014	0.2006	1.42074	0.18742		1178	31	1224	24	1311	45	1311	45	0.898551	f
FT-1_89	243.267	38933.7	1.91419	11.7509	0.822562	2.321	1.61568	0.1994	1.45436	0.84204		1171	32	1217	23	1316	31	1316	31	0.889818
FT-1_2	35.9901	4313.5	2.28304	11.5741	1.27315	1.82	2.08791	0.1547	1.77763	0.70178		925	31	1044	27	1321	48	1321	48	0.700227
FT-1_106	5.32199	1097.4	2.18487	11.1359	2.11581	3.11	2.57235	0.254	1.85039	0.38085		1454	48	1414	41	1323	90	1323	90	1.09902
FT-1_108	1.25653	184.9	1.566	8.62069	5.60345	2.39	5.43933	0.164	3.04878	0.17853		973	56	1109	84	1330	220	1330	220	0.731579	i
FT-1_65	269.73	4007.85	1.22246	11.4548	0.801833	2.31	1.64502	0.1923	1.50806	0.88517		1133	31	1212	24	1366	30	1366	30	0.829429
FT-1_88	77.4272	1428.21	1.25941	11.4025	1.08324	2.48	2.62097	0.206	2.42718	0.91773		1201	55	1244	42	1369	42	1369	42	0.877283	c, i
FT-1_23	158.589	27522.9	1.99331	11.4155	0.856164	2.566	1.7537	0.2107	1.58994	0.87807		1233	35	1288	26	1374	33	1374	33	0.89738
FT-1_9	218.572	1662.53	0.573672	11.3122	0.961538	2.05	2.43902	0.1673	2.48057	0.9388		991	46	1112	35	1389	37	1389	37	0.713463	e, i
FT-1_86	85.9112	15998	2.50695	10.2669	1.07803	2.96	3.04054	0.22	2.72727	0.96436		1273	64	1359	52	1567	40	1567	40	0.81238	c, i
FT-1_87	218.351	2489.8	3.15028	10.1626	0.813008	3.06	1.63399	0.2268	1.43298	0.64521		1317	34	1419	25	1589	32	1589	32	0.828823	f
FT-1_82	50.1183	6850.3	23.9831	9.43396	8.01887	3.31	8.91239	0.219	5.02283	0.66639		1280	120	1450	130	1650	250	1650	250	0.775758	c, d
FT-1_51	97.7715	1317	1.25278	9.78474	0.92955	3.37	1.63205	0.2399	1.37557	0.49559		1386	34	1496	26	1657	34	1657	34	0.836451	e
FT-1_18	284.449	15665.7	2.15548	9.56938	0.76555	3.74	1.87166	0.2581	1.76288	0.97194		1476	47	1568	33	1703	28	1703	28	0.866706
FT-1_5	464.242	52474.2	2.68956	9.37207	0.749766	2.75	1.81818	0.1873	1.68179	0.96704		1105	34	1334	28	1741	28	1741	28	0.634693
FT-1_98	295.291	5644.35	2.82059	9.25926	0.787037	3.89	1.92802	0.2614	1.7215	0.96628		1497	46	1604	33	1765	29	1765	29	0.848159
FT-1_93	287.494	53655.2	3.12621	8.76424	0.744961	3.61	1.52355	0.2304	1.36719	0.69934		1336	33	1550	24	1863	28	1863	28	0.717123
FT-1_68	104.396	4602.63	2.58633	6.18812	0.866337	5.64	3.90071	0.252	3.76984	0.99025		1414	93	1829	61	2467	29	2467	29	0.573166	i
FT-1_31	195.328	7466.53	4.4188	5.86854	0.792254	6.66	1.65165	0.2824	1.45184	0.89752		1602	41	2063	29	2559	26	2559	26	0.626026	f
Sample FT-26 (accepted analyses = 91/126)
FT-26_51	126.805	15583.7	1.01378	14.1443	0.990099	1.475	1.62712	0.1511	1.38981	0.32549		907	23	919	20	936	41	936	41	0.969017
FT-26_42	39.5749	5000.4	1.25221	13.9665	1.46648	1.584	1.98864	0.1596	1.50376	0.39995		954	26	958	25	943	59	943	59	1.01166
FT-26_69	295.646	9048.06	2.68456	13.9082	0.834492	1.555	1.54341	0.1558	1.41207	0.58337		934	25	951	19	977	34	977	34	0.955988
FT-26_58	20.9692	2029.09	1.57003	13.6054	1.76871	1.607	2.05352	0.1593	1.53798	0.080419		952	27	967	25	980	72	980	72	0.971429
FT-26_2	38.7782	4965.2	3.0263	13.6054	1.29252	1.646	1.85298	0.1638	1.4652	0.26812		977	26	985	24	995	55	995	55	0.98191
FT-26_33	124.47	16022.1	5.42778	13.7363	0.892857	1.599	1.59475	0.1581	1.39152	0.55137		946	24	969	20	999	37	999	37	0.946947
FT-26_125	112.816	2510.3	9.24644	13.7174	0.960219	1.651	1.60509	0.1654	1.39057	0.33289		987	25	988	20	999	40	999	40	0.987988
FT-26_104	71.5698	9182.5	4.23162	13.624	1.08992	1.584	1.70455	0.1579	1.39329	0.33204		945	25	962	21	1004	45	1004	45	0.941235
FT-26_96	187.579	24881.7	2.85506	13.7174	0.891632	1.635	1.55963	0.162	1.38889	0.48755		968	25	982	20	1007	36	1007	36	0.961271
FT-26_16	49.6567	6605	2.02972	13.6054	1.36054	1.742	1.89437	0.1697	1.50265	0.4043		1010	28	1020	24	1009	55	1009	55	1.00099	a
FT-26_100	117.9	3355.39	1.87338	13.624	0.953678	1.687	1.60047	0.1675	1.37313	0.46394		998	26	1003	20	1020	37	1020	37	0.978431
FT-26_95	135.395	18505.6	4.27642	13.5685	0.949796	1.688	1.59953	0.1654	1.39057	0.48003		987	26	1002	20	1023	38	1023	38	0.964809
FT-26_103	61.8569	8609.2	2.75813	13.459	1.07672	1.729	1.70619	0.17	1.41176	0.4065		1012	26	1017	22	1028	45	1028	45	0.984436
FT-26_68	89.6716	1537.48	2.03873	13.5135	1.01351	1.673	1.61387	0.1629	1.41191	0.32719		973	25	997	21	1030	41	1030	41	0.94466
FT-26_107	124.391	17156	3.1728	13.5135	0.878378	1.704	1.58451	0.1678	1.37068	0.40104		1000	26	1008	20	1032	37	1032	37	0.968992
FT-26_54	125.208	16608.2	4.10607	13.5501	0.948509	1.678	1.60906	0.1645	1.39818	0.50579		981	26	999	21	1033	37	1033	37	0.949661
FT-26_1	393.69	12949.6	5.51408	13.5318	0.811908	1.595	1.5047	0.1569	1.3703	0.60179		940	24	968	19	1035	32	1035	32	0.908213
FT-26_43	16.8766	2340.6	2.06195	13.1062	1.83486	1.812	2.2351	0.1724	1.59513	0.26016		1024	30	1041	30	1036	77	1036	77	0.988417	a
FT-26_56	90.4365	12218.6	3.79583	13.4409	1.00806	1.712	1.66472	0.1664	1.41226	0.34866		992	26	1010	21	1037	41	1037	41	0.956606
FT-26_82	132.173	17015	2.64051	13.4953	0.877193	1.768	1.58371	0.1718	1.36787	0.41048		1022	26	1033	21	1038	37	1038	37	0.984586
FT-26_108	149.637	21075.2	4.24324	13.459	0.874832	1.743	1.57774	0.1713	1.37186	0.44814		1019	26	1023	20	1043	36	1043	36	0.976989
FT-26_18	19.2652	2722.9	3.30278	13.1234	1.5748	1.842	2.09012	0.1732	1.47229	0.30789		1029	28	1052	27	1045	67	1045	67	0.984689
FT-26_87	87.2671	2613.8	2.82123	13.3511	1.00134	1.803	1.60843	0.1743	1.40562	0.41514		1036	27	1045	21	1051	40	1051	40	0.985728
FT-26_91	179.662	25580.4	3.57306	13.3869	0.870147	1.791	1.59129	0.1729	1.417	0.60882		1028	27	1040	21	1054	35	1054	35	0.975332
FT-26_8	118.728	2342.99	1.81896	13.3511	0.934579	1.793	1.58951	0.1731	1.38648	0.43362		1029	27	1041	21	1059	37	1059	37	0.971671
FT-26_45	192.363	6292.07	3.04876	13.369	0.868984	1.703	1.55608	0.1645	1.39818	0.57949		981	25	1008	19	1060	34	1060	34	0.925472
FT-26_106	137.852	19852.2	3.74275	13.3156	0.932091	1.821	1.59253	0.177	1.38418	0.46807		1050	27	1051	21	1062	37	1062	37	0.988701
FT-26_61	177.346	24201.5	3.23713	13.3156	0.865513	1.76	1.5625	0.1688	1.39218	0.49657		1005	26	1030	20	1064	35	1064	35	0.944549	a
FT-26_76	50.3624	1142.18	3.16348	13.245	1.0596	1.879	1.70303	0.1794	1.4214	0.35857		1066	29	1073	23	1068	44	1068	44	0.998127
FT-26_99	38.3186	5154.3	1.75815	13.0719	2.22222	1.941	2.47295	0.1857	1.77706	0.22733		1097	36	1089	34	1069	93	1069	93	1.02619	a, d, i
FT-26_47	207.86	28730.2	4.06566	13.2626	0.862069	1.757	1.53671	0.1684	1.3658	0.47716		1004	26	1029	20	1072	34	1072	34	0.936567
FT-26_44	93.3954	13063.1	1.9493	13.2275	0.992063	1.764	1.64399	0.169	1.39053	0.39332		1006	26	1032	21	1072	40	1072	40	0.938433
FT-26_67	105.881	2270.91	1.09807	13.2626	0.928382	1.773	1.57924	0.1698	1.38398	0.37396		1011	26	1035	21	1073	37	1073	37	0.942218
FT-26_105	137.051	20063	6.58759	13.2275	0.925926	1.836	1.57952	0.1772	1.38262	0.40344		1051	27	1057	20	1074	37	1074	37	0.978585
FT-26_111	55.47	8224.3	2.91962	13.1926	1.05541	1.872	1.62927	0.1803	1.41431	0.29781		1068	28	1068	22	1074	42	1074	42	0.994413
FT-26_12	180.324	5540.14	3.18681	13.245	0.860927	1.778	1.5748	0.1691	1.38971	0.61342		1007	26	1036	20	1077	34	1077	34	0.935005
FT-26_26	77.6391	11311.3	2.27453	13.1926	1.05541	1.954	1.68884	0.1845	1.43631	0.43467		1091	29	1097	23	1077	43	1077	43	1.013
FT-26_57	171.761	24243.9	4.08682	13.21	0.858653	1.803	1.55297	0.1722	1.39373	0.37772		1024	26	1045	20	1079	36	1079	36	0.949027
FT-26_94	81.0434	11935.1	2.55053	13.1926	0.989446	1.853	1.64598	0.1771	1.3834	0.4576		1051	27	1062	21	1080	40	1080	40	0.973148
FT-26_25	344.48	47460.1	5.31041	13.21	0.792602	1.775	1.52113	0.1679	1.36986	0.6378		1000	25	1035	20	1084	32	1084	32	0.922509
FT-26_71	108.808	15497.2	2.68686	13.1579	0.921053	1.84	1.60326	0.1743	1.37694	0.40391		1036	27	1059	21	1087	38	1087	38	0.953082
FT-26_72	106.991	15707.9	3.03172	13.1062	0.917431	1.922	1.6129	0.1812	1.37969	0.43446		1073	27	1087	21	1090	39	1090	39	0.984404
FT-26_102	65.3261	2631.95	2.20479	13.1062	1.04849	1.896	1.71414	0.1805	1.44044	0.50856		1069	28	1076	22	1091	42	1091	42	0.979835
FT-26_114	25.0336	3742.2	2.16979	12.9702	1.42672	1.927	1.89414	0.1838	1.46899	0.18371		1087	29	1087	26	1095	58	1095	58	0.992694
FT-26_39	87.2304	1268.28	1.27468	13.0378	0.977836	1.924	1.61123	0.1806	1.38427	0.38796		1070	27	1087	22	1102	38	1102	38	0.970962
FT-26_117	230.841	34474	1.59683	12.9702	0.843061	1.94	1.52062	0.1836	1.38889	0.48191		1086	28	1094	20	1119	33	1119	33	0.970509
FT-26_22	77.13	11694.9	2.79948	12.8866	1.03093	2.02	1.65842	0.1857	1.40011	0.43702		1098	28	1119	22	1123	40	1123	40	0.977738
FT-26_30	27.3384	3946.6	2.21968	12.7551	1.33929	1.916	1.85282	0.1764	1.47392	0.28391		1046	28	1082	25	1127	54	1127	54	0.928128
FT-26_70	112.114	4165.06	1.76264	12.8041	0.896287	2.025	1.60494	0.1865	1.3941	0.48958		1102	28	1122	22	1143	37	1143	37	0.964129
FT-26_15	102.999	15575.6	1.76588	12.8205	0.897436	2.03	1.60099	0.1856	1.37392	0.4478		1097	28	1124	21	1144	36	1144	36	0.958916
FT-26_123	22.3069	1226.72	2.96987	12.5471	1.56838	2.135	2.03747	0.1961	1.50433	0.26495		1154	32	1149	28	1145	63	1145	63	1.00786
FT-26_62	79.4121	12146.1	2.56904	12.7551	0.956633	2.055	1.60584	0.1891	1.40137	0.42534		1116	29	1132	22	1154	38	1154	38	0.967071
FT-26_90	306.793	47486.2	5.90356	12.7551	0.765306	2.035	1.52334	0.1878	1.35783	0.57978		1109	28	1128	21	1155	31	1155	31	0.960173
FT-26_37	416.892	5130.5	6.15963	12.7551	0.765306	1.997	1.50225	0.1834	1.36314	0.59299		1085	27	1114	20	1156	31	1156	31	0.938581
FT-26_73	403.49	7581.19	4.64733	12.7226	0.763359	2.027	1.50469	0.1858	1.37244	0.6708		1099	28	1124	21	1159	31	1159	31	0.948231
FT-26_86	74.7113	7176.73	3.86548	12.5945	1.07053	2.099	1.66746	0.1909	1.38816	0.30772		1126	29	1145	23	1165	42	1165	42	0.966524
FT-26_24	188.013	15821.9	3.57137	12.6582	0.886076	1.995	1.55388	0.1805	1.38504	0.50599		1071	28	1113	21	1167	33	1167	33	0.917738
FT-26_60	157.076	24633.1	2.28695	12.5945	0.881612	2.113	1.56176	0.1924	1.40333	0.5695		1134	29	1152	22	1176	34	1176	34	0.964286
FT-26_3	86.8951	12614	3.08982	12.4378	1.1194	2.004	1.74651	0.1819	1.40187	0.47491		1077	28	1116	24	1187	43	1187	43	0.907329	e
FT-26_6	210.315	9665.74	4.01108	12.4069	0.868486	2.146	1.53774	0.1921	1.37949	0.43662		1133	29	1162	21	1205	33	1205	33	0.940249
FT-26_109	122.11	20582.5	3.78918	12.3153	0.862069	2.3	1.56522	0.207	1.37681	0.46232		1212	30	1211	22	1219	34	1219	34	0.994258
FT-26_31	115.534	18494.9	3.36254	12.1951	0.914634	2.247	1.57988	0.1971	1.39523	0.51654		1159	29	1195	23	1240	36	1240	36	0.934677
FT-26_120	157.721	26701.7	2.77298	11.7647	0.882353	2.416	1.59354	0.2071	1.42443	0.58862		1213	31	1245	23	1310	33	1310	33	0.925954
FT-26_80	46.9456	8029.5	1.93536	11.7371	1.05634	2.479	1.67406	0.2102	1.42721	0.35769		1230	32	1262	24	1312	40	1312	40	0.9375
FT-26_77	201.184	20745	2.03682	11.655	0.815851	2.577	1.53279	0.2171	1.38185	0.57783		1266	32	1293	22	1332	31	1332	31	0.95045
FT-26_92	51.3367	9475	1.91513	11.534	1.03806	2.703	1.68331	0.226	1.41593	0.39723		1313	34	1327	24	1337	41	1337	41	0.982049
FT-26_74	98.8635	17965.7	2.6108	11.5473	0.866051	2.69	1.57993	0.2238	1.40751	0.56502		1301	33	1323	23	1345	34	1345	34	0.967286
FT-26_21	151.176	25866	1.21881	11.5207	0.864055	2.562	1.60031	0.2111	1.42113	0.66662		1234	32	1287	23	1354	33	1354	33	0.911374
FT-26_65	81.4408	14975.4	1.06806	11.4286	0.914286	2.78	1.58273	0.2299	1.41366	0.4401		1333	34	1350	24	1361	36	1361	36	0.979427
FT-26_5	63.2401	2613.41	1.91327	11.4416	0.97254	2.742	1.64114	0.2265	1.39073	0.39295		1316	33	1337	24	1362	39	1362	39	0.966226
FT-26_118	36.6732	7022.2	1.73712	11.3636	1.13636	2.819	1.72047	0.2338	1.43285	0.35004		1354	35	1357	25	1365	43	1365	43	0.991941
FT-26_79	104.756	19384.6	2.53539	11.4416	0.858124	2.761	1.57552	0.2278	1.38279	0.53752		1323	33	1343	24	1366	34	1366	34	0.968521
FT-26_7	67.0983	1301.05	1.56066	11.3895	0.911162	2.72	1.59926	0.2241	1.40562	0.45046		1303	33	1332	25	1369	36	1369	36	0.95179
FT-26_52	13.5696	2483.8	2.31559	11.236	1.62921	2.76	2.17391	0.2245	1.53675	0.32511		1304	36	1339	32	1369	64	1369	64	0.95252
FT-26_93	34.7995	6433	1.06112	11.325	1.1325	2.739	1.71595	0.2256	1.4406	0.30999		1311	34	1334	26	1369	44	1369	44	0.957633
FT-26_66	38.4198	7020.2	1.97799	11.3122	1.13122	2.726	1.68745	0.2227	1.43691	0.38272		1295	34	1332	25	1376	42	1376	42	0.941134
FT-26_19	58.0444	10606.2	1.36341	11.3122	1.0181	2.746	1.65696	0.222	1.41892	0.38429		1292	33	1337	24	1381	40	1381	40	0.935554
FT-26_89	90.6905	2776.35	1.86911	11.325	0.906002	2.777	1.58444	0.2274	1.38522	0.44714		1320	33	1347	24	1381	35	1381	35	0.955829
FT-26_119	34.7142	6160.4	2.39129	11.2108	1.34529	2.78	1.79856	0.2277	1.51515	0.3293		1322	36	1345	28	1388	52	1388	52	0.95245	a
FT-26_116	111.08	22542.9	2.6788	11.0865	0.831486	3.036	1.54809	0.2454	1.38549	0.44571		1415	35	1415	24	1425	33	1425	33	0.992982
FT-26_113	194.083	2900.7	2.8146	11.0742	0.830565	2.922	1.57426	0.236	1.39831	0.69056		1366	34	1385	24	1427	32	1427	32	0.957253
FT-26_122	222.483	42894	2.18901	10.8932	0.816993	2.984	1.5248	0.2374	1.369	0.62441		1373	34	1402	23	1459	31	1459	31	0.941056
FT-26_78	152.904	4718.56	4.51074	9.98004	0.798403	3.79	1.58311	0.2728	1.41129	0.76485		1555	39	1589	25	1624	29	1624	29	0.957512
FT-26_84	120.731	29910.9	2.13051	9.21659	0.829493	4.48	1.5625	0.2984	1.39075	0.6098		1683	41	1725	26	1770	30	1770	30	0.950847
FT-26_9	82.2064	18588.7	1.52981	9.1659	1.00825	4.52	1.65929	0.2986	1.49029	0.52246		1684	44	1732	28	1777	37	1777	37	0.947665	h
FT-26_81	160.982	38646.2	2.98956	8.94454	0.805009	4.55	1.53846	0.2937	1.39598	0.71822		1659	41	1739	26	1828	29	1828	29	0.907549
FT-26_40	105.982	3077.38	5.02869	8.88099	0.79929	4.73	1.58562	0.3031	1.38568	0.57377		1706	41	1771	26	1837	30	1837	30	0.928688
FT-26_83	117.019	9358.96	4.98081	8.88099	0.79929	4.69	1.59915	0.3004	1.43142	0.76369		1692	43	1764	27	1839	29	1839	29	0.920065
FT-26_64	110.549	7996.28	3.11299	6.02047	0.782661	9.9	1.51515	0.429	1.3986	0.62099		2300	53	2425	28	2518	27	2518	27	0.913423
FT-26_13	93.5929	36092.1	1.0224	5.50055	0.770077	11.93	1.5088	0.471	1.38004	0.72664		2485	57	2598	28	2668	25	2668	25	0.931409
FT-26_112	45.9703	2973.61	2.44796	5.42594	0.81389	12.62	1.54517	0.499	1.40281	0.65193		2612	61	2649	29	2689	27	2689	27	0.971365
Sample FT-26 (rejected analyses = 35/126)
FT-26_46	926.651	1785.9	7.74246	14.2045	0.78125	0.876	1.5411	0.0896	1.39509	0.70963		553	15	639	15	939	33	553	15	0.588924	b
FT-26_110	503.469	534.578	5.67472	10.2354	1.63767	1.498	2.53672	0.1128	1.8617	0.6642		688	24	919	29	1551	60	688	24	0.443585	b, e
FT-26_55	457.472	3069.08	3.76059	9.4518	0.803403	1.969	2.26003	0.134	2.12687	0.97794		808	32	1090	31	1725	29	808	32	0.468406
FT-26_101	13.8964	747.789	1.5362	13.947	2.02232	1.56	2.30769	0.1608	1.55473	0.16418		960	28	948	29	889	84	889	84	1.07987
FT-26_63	341.395	6431.6	3.24598	13.5318	0.879567	1.588	1.57431	0.1549	1.38799	0.54011		928	24	965	20	1034	35	1034	35	0.897485	c
FT-26_11	162.993	19984	2.21162	13.1926	1.05541	1.674	1.70251	0.1586	1.41866	0.56991		949	25	997	22	1086	40	1086	40	0.873849	f
FT-26_49	63.5785	8537.9	1.43658	13.0378	1.1734	1.762	1.70261	0.1652	1.39225	0.18669		986	26	1029	22	1101	48	1101	48	0.89555	e
FT-26_59	117	14681.7	2.39565	12.9534	1.1658	1.783	2.13124	0.1668	1.85851	0.81228		993	34	1035	28	1116	46	1116	46	0.889785	a
FT-26_20	176.454	1714.15	4.6749	12.3457	1.04938	1.72	1.59884	0.153	1.43791	0.18909		917	25	1015	21	1209	41	1209	41	0.758478	g
FT-26_34	57.8692	1181.15	2.05184	11.7647	1.05882	2.201	1.65834	0.186	1.42473	0.21587		1099	29	1178	23	1304	44	1304	44	0.842791
FT-26_53	165.7	7731.09	1.4027	11.4025	0.855188	2.475	1.53535	0.2043	1.37053	0.54018		1198	30	1265	22	1372	32	1372	32	0.873178
FT-26_29	170.161	3708.42	2.64214	11.3379	0.85034	2.088	1.72414	0.1727	1.53445	0.77796		1026	29	1142	24	1384	32	1384	32	0.741329	c
FT-26_10	322.304	3459.1	1.68723	11.1235	0.778643	2.221	1.55335	0.1775	1.40845	0.69355		1053	27	1186	22	1421	31	1421	31	0.741027
FT-26_48	94.367	1089.33	1.99012	11.0132	1.15639	2.103	1.78317	0.1657	1.41823	0.34458		989	27	1146	25	1432	47	1432	47	0.690642	e
FT-26_88	162.466	4103.81	1.73969	11.0375	0.883002	2.278	1.64618	0.181	1.43646	0.63328		1072	28	1203	23	1438	36	1438	36	0.74548	a
FT-26_98	341.888	7523.18	3.36836	11.0011	0.825083	2.539	1.53604	0.2032	1.37795	0.49961		1192	30	1282	23	1438	32	1438	32	0.828929	e
FT-26_17	65.4112	1096.43	1.34359	10.3627	1.34715	2.75	2	0.2051	1.43832	0.57742		1202	31	1332	28	1528	50	1528	50	0.786649	e
FT-26_35	313.553	6268.36	2.60604	10.0806	0.756048	2.689	1.6177	0.1956	1.48262	0.89563		1151	31	1324	24	1606	29	1606	29	0.716687	f
FT-26_75	432.611	43310.8	0.932117	10.0705	0.755287	3.03	1.81518	0.2197	1.72963	0.97104		1277	40	1407	30	1610	28	1610	28	0.793168
FT-26_97	81.4625	2362.19	2.29497	9.96016	1.19522	3.34	1.79641	0.241	1.39004	0.36641		1391	35	1486	28	1612	43	1612	43	0.862903	e
FT-26_115	167.699	23991.9	1.52294	9.90099	0.891089	2.661	1.8602	0.1932	1.78571	0.9007		1136	38	1310	28	1635	33	1635	33	0.694801
FT-26_41	255.122	2096.46	1.83174	9.71817	0.874636	2.702	1.64693	0.1896	1.52954	0.722		1118	32	1327	25	1672	33	1672	33	0.66866	e
FT-26_85	165.666	3448.53	3.11754	9.57854	0.909962	3.22	2.32919	0.222	2.25225	0.95635		1286	55	1438	41	1697	33	1697	33	0.757808	e, i
FT-26_121	203.603	23907.4	2.93746	9.26784	0.787766	3.84	1.69271	0.2596	1.63713	0.92575		1485	44	1594	29	1761	29	1761	29	0.843271
FT-26_50	250.941	12168.3	2.35627	9.25926	0.787037	3.98	1.50754	0.2665	1.38837	0.77295		1522	38	1630	25	1764	29	1764	29	0.862812
FT-26_36	217.476	1530.5	4.26127	9.14077	0.868373	2.87	1.91638	0.1882	1.67375	0.90975		1110	34	1365	30	1786	32	1786	32	0.621501	e
FT-26_23	198.168	2304.19	4.82323	8.76424	0.964067	3.26	1.68712	0.2059	1.627	0.70948		1205	36	1469	26	1856	34	1856	34	0.649246	e
FT-26_27	64.5581	483.132	2.58246	8.65801	1.99134	3.67	2.86104	0.2284	1.5324	0.83648		1325	36	1544	41	1863	74	1863	74	0.711218	f, g
FT-26_14	148.144	1149.04	2.50154	8.17661	1.79886	5.01	2.69461	0.293	1.53584	0.82202		1654	45	1793	28	1929	36	1929	36	0.857439	b, e
FT-26_38	67.4702	293.801	0.871141	7.79423	1.67576	3.47	2.30548	0.1933	1.42266	0.558		1139	30	1499	39	2010	69	2010	69	0.566667	b, g
FT-26_32	269.1	1487.53	4.41948	5.58971	0.810509	5.82	3.35052	0.23	3.26087	0.99432		1316	77	1860	68	2640	27	2640	27	0.498485	g, i
FT-26_28	119.244	38027.6	2.62939	5.45852	0.764192	10.01	1.7982	0.391	1.6624	0.96398		2124	60	2425	33	2682	25	2682	25	0.791946
FT-26_9	56.0959	148.81	2.13261	5.23286	1.04657	8.69	1.78366	0.3274	1.4661	0.69054		1825	47	2301	33	2745	35	2745	35	0.664845	b, h
FT-26_4	81.4438	478.47	1.80068	5.15996	1.13519	12.2	1.84426	0.453	1.43488	0.52934		2407	56	2612	34	2760	35	2760	35	0.872101	f
FT-26_124	379.633	1146.81	4.33359	4.7824	1.07604	6.37	4.08163	0.218	3.66972	0.96034		1258	86	1966	77	2898	35	2898	35	0.434092	c, e, i
Sample FT-31 (accepted analyses = 69/125)
FT-31_108	91.571	1638.25	1.81486	13.9082	0.973574	1.537	1.62655	0.1558	1.41207	0.49767		933	25	943	20	972	41	972	41	0.959877
FT-31_1	241.129	6494.02	2.23913	13.9665	0.837989	1.532	1.53394	0.1554	1.38353	0.45688		931	24	942	19	973	35	973	35	0.956835
FT-31_20	324.985	42170.6	5.18753	13.7552	0.825309	1.61	1.52174	0.1607	1.36901	0.51156		960	24	973	19	1003	33	1003	33	0.957129
FT-31_19	216.519	27807.9	3.98592	13.624	0.817439	1.576	1.55457	0.1561	1.37732	0.51256		935	24	960	19	1019	34	1019	34	0.917566
FT-31_107	119.42	16238.8	2.72539	13.587	0.951087	1.729	1.59051	0.1714	1.37106	0.38798		1020	26	1018	20	1020	38	1020	38	1
FT-31_66	486.334	5954.82	13.68	13.624	0.749319	1.618	1.51422	0.1594	1.34881	0.6301		953	24	977	19	1023	31	1023	31	0.931574
FT-31_99	900.573	4587.11	3.11185	13.5501	0.745257	1.713	1.51781	0.1684	1.3658	0.85198		1003	25	1013	19	1034	30	1034	30	0.970019
FT-31_79	87.5284	12340.7	1.05716	13.459	0.942127	1.765	1.61473	0.1718	1.39697	0.41139		1022	26	1031	21	1046	40	1046	40	0.977055
FT-31_117	346.067	44025.3	3.41465	13.4409	0.806452	1.619	1.51328	0.1597	1.37758	0.62954		956	25	977	19	1047	33	1047	33	0.913085
FT-31_71	88.8904	3334.88	2.00568	13.3869	0.937082	1.764	1.5873	0.1711	1.37347	0.40613		1018	26	1030	21	1053	39	1053	39	0.966762
FT-31_42	173.684	23847.4	0.862143	13.3869	0.870147	1.772	1.55192	0.1712	1.37266	0.3964		1019	26	1034	20	1053	37	1053	37	0.967711
FT-31_34	191.159	25970.1	4.01442	13.3869	0.803213	1.731	1.53091	0.1675	1.37313	0.54194		998	25	1020	20	1055	34	1055	34	0.945972
FT-31_111	187.852	25482.1	1.5021	13.3511	0.867824	1.749	1.57233	0.1708	1.37588	0.47373		1017	26	1025	20	1058	35	1058	35	0.961248
FT-31_69	38.4708	5325.4	3.55956	13.1752	1.25165	1.773	1.80485	0.1691	1.44885	0.36186		1007	27	1032	24	1071	50	1071	50	0.940243
FT-31_44	251.358	34996	3.17229	13.2275	0.793651	1.789	1.50922	0.171	1.37427	0.49192		1017	26	1041	20	1079	33	1079	33	0.942539
FT-31_3	97.3966	14519.3	2.30986	12.9366	0.970246	1.936	1.60124	0.1826	1.3965	0.48623		1081	28	1091	22	1117	38	1117	38	0.967771
FT-31_74	65.0917	9139.6	2.88302	12.837	1.09114	1.841	1.65671	0.171	1.43275	0.30508		1017	27	1057	22	1124	45	1124	45	0.904804
FT-31_45	62.8143	9662.7	2.13355	12.87	1.0296	2.035	1.64619	0.1887	1.40435	0.32761		1114	29	1124	23	1128	42	1128	42	0.987589
FT-31_26	47.8052	7189.4	2.39438	12.8041	1.15237	2.007	1.71898	0.1858	1.42626	0.34777		1099	29	1115	24	1130	46	1130	46	0.972566
FT-31_40	102.459	5516.13	3.31793	12.87	0.965251	1.954	1.61208	0.181	1.40884	0.40768		1072	28	1098	22	1131	38	1131	38	0.947834
FT-31_4	54.4088	8283.4	2.28656	12.7877	1.08696	2.028	1.70118	0.1884	1.43312	0.37181		1112	29	1121	23	1136	44	1136	44	0.978873
FT-31_67	199.281	30431.5	2.03575	12.7226	0.826972	2.027	1.55402	0.1867	1.36583	0.5469		1103	28	1123	21	1156	34	1156	34	0.954152
FT-31_76	5.68152	959.3	3.09535	11.8343	2.36686	2.45	2.85714	0.2091	1.7934	0.39165		1221	40	1225	42	1180	100	1180	100	1.03475
FT-31_18	234.159	36352	2.3599	12.4069	0.806452	2.132	1.52439	0.1914	1.35841	0.55221		1129	28	1158	21	1212	33	1212	33	0.931518
FT-31_46	83.549	12878	3.34809	12.3457	0.987654	2.117	1.62966	0.1885	1.40584	0.37907		1113	29	1153	22	1214	39	1214	39	0.916804
FT-31_27	328.011	39295.9	2.03421	12.3609	0.803461	2.163	1.52566	0.1934	1.37022	0.61294		1140	29	1168	21	1215	31	1215	31	0.938272
FT-31_101	65.998	11019.6	2.27209	11.976	1.01796	2.415	1.71843	0.2102	1.42721	0.58267		1229	32	1242	25	1270	41	1270	41	0.967717
FT-31_82	108.044	17682.8	1.85369	11.9332	0.894988	2.331	1.56585	0.2016	1.38889	0.46729		1184	30	1220	22	1279	35	1279	35	0.925723
FT-31_21	96.587	14843.9	2.84788	11.8343	1.89349	2.7	4.07407	0.23	2.6087	0.90554		1350	72	1315	55	1290	73	1290	73	1.04651	c, d, i
FT-31_125	76.3337	2229.31	2.67867	11.655	0.932401	2.585	1.60542	0.2213	1.42341	0.40718		1288	33	1294	23	1323	36	1323	36	0.973545
FT-31_22	311.692	53124.8	1.97172	11.6144	0.754936	2.525	1.52475	0.2122	1.36664	0.65686		1240	31	1279	22	1343	31	1343	31	0.923306
FT-31_32	338.081	58894.1	1.55226	11.5607	0.751445	2.573	1.49631	0.2151	1.37146	0.66456		1256	31	1292	22	1347	29	1347	29	0.932442
FT-31_121	84.6072	1806.17	2.68804	11.4679	0.917431	2.588	1.60355	0.2181	1.42137	0.55902		1271	33	1295	24	1355	35	1355	35	0.938007
FT-31_85	169.36	11129.8	3.02354	11.4943	0.804598	2.674	1.55198	0.2217	1.37573	0.57189		1290	32	1320	23	1358	33	1358	33	0.949926
FT-31_84	95.4016	17638.3	3.15016	11.4416	0.858124	2.746	1.58412	0.2272	1.38644	0.52646		1319	33	1339	23	1361	34	1361	34	0.96914
FT-31_81	153.144	27994.9	4.16442	11.4679	0.860092	2.71	1.53137	0.2247	1.37962	0.49883		1307	32	1330	23	1363	33	1363	33	0.958914
FT-31_29	136.916	24916.7	2.49457	11.4416	0.800915	2.722	1.54298	0.2254	1.37533	0.52122		1310	33	1333	23	1365	32	1365	32	0.959707
FT-31_86	163.552	15747.2	1.94903	11.4025	0.855188	2.655	1.54426	0.2187	1.37174	0.51163		1275	32	1315	23	1373	33	1373	33	0.928623
FT-31_73	116.235	21418	3.48495	11.3636	0.852273	2.778	1.54788	0.2286	1.37795	0.56444		1327	33	1349	24	1376	32	1376	32	0.96439
FT-31_31	23.7865	4501.5	1.36273	11.1857	1.23043	2.91	1.89003	0.2352	1.4881	0.41128		1364	36	1379	27	1391	50	1391	50	0.98059
FT-31_6	167.654	25962.7	2.34249	11.2613	1.01351	2.78	1.79856	0.2279	1.62352	0.76116		1322	39	1346	29	1396	39	1396	39	0.946991	c
FT-31_60	15.725	3082.5	1.62379	10.9051	1.47219	3.01	1.99336	0.2403	1.53974	0.29442		1387	38	1405	29	1422	57	1422	57	0.975387	e
FT-31_116	115.215	21972.8	2.41083	11.0742	0.830565	2.951	1.55879	0.24	1.39583	0.62453		1386	35	1395	24	1426	32	1426	32	0.97195
FT-31_50	153.168	5579.74	3.95886	11.0497	0.828729	2.89	1.53979	0.2309	1.36423	0.50259		1339	33	1379	23	1433	32	1433	32	0.934403
FT-31_62	94.4342	18475.9	2.50501	11.0254	0.882029	3.002	1.56562	0.2393	1.37902	0.47874		1383	35	1406	24	1433	34	1433	34	0.965108
FT-31_115	143.167	26919.5	2.94269	11.0011	0.825083	2.882	1.56142	0.2325	1.39785	0.65809		1347	34	1375	23	1441	32	1441	32	0.934768
FT-31_118	110.129	21129.1	1.37029	10.9529	0.876232	3.019	1.55681	0.2423	1.38258	0.49135		1398	35	1410	24	1449	33	1449	33	0.964803
FT-31_17	100.345	2093.16	1.54509	10.8108	0.864865	3.074	1.54522	0.2421	1.38373	0.37443		1397	35	1426	25	1470	34	1470	34	0.95034
FT-31_61	141.24	29792.6	2.99928	9.8912	0.890208	3.74	1.87166	0.268	1.69776	0.91071		1528	47	1576	32	1641	33	1641	33	0.93114	c
FT-31_119	176.242	38952.8	1.53836	9.76562	0.78125	3.89	1.54242	0.2792	1.37894	0.6736		1587	39	1611	25	1666	29	1666	29	0.952581
FT-31_87	108.698	24544.4	2.16017	9.69932	0.824442	3.96	1.51515	0.2783	1.3834	0.5502		1582	39	1625	25	1676	30	1676	30	0.943914
FT-31_33	142.205	34743.9	3.06028	9.30233	0.790698	4.51	1.55211	0.3031	1.36919	0.53852		1707	42	1733	26	1754	30	1754	30	0.973204
FT-31_77	158.119	37107.4	1.92031	9.27644	0.788497	4.28	1.51869	0.287	1.37631	0.66978		1626	40	1688	25	1760	29	1760	29	0.923864
FT-31_47	307.387	72373.8	4.57794	9.26784	0.741427	4.31	1.50812	0.2886	1.386	0.79475		1635	41	1696	25	1764	27	1764	27	0.926871
FT-31_68	186.696	27170.2	2.98919	9.2081	0.782689	4.45	1.46067	0.2959	1.36871	0.68825		1671	40	1721	25	1774	28	1774	28	0.941939
FT-31_120	126.739	30078.8	1.81026	9.19963	0.827967	4.43	1.58014	0.2984	1.40751	0.70357		1682	41	1716	26	1774	30	1774	30	0.94814
FT-31_39	217.291	5468.07	4.80763	9.04977	0.769231	4.55	1.53846	0.2969	1.3641	0.67544		1675	40	1738	25	1806	29	1806	29	0.927464
FT-31_98	80.0586	20025.9	3.71308	8.86525	0.886525	4.83	1.65631	0.3108	1.44788	0.71492		1745	44	1787	27	1840	31	1840	31	0.94837
FT-31_75	81.6198	20989.1	2.53117	8.7184	0.828248	4.98	1.50602	0.3148	1.39771	0.64683		1764	43	1813	26	1872	31	1872	31	0.942308
FT-31_103	129.162	30990.4	2.39816	8.68056	0.824653	4.74	1.58228	0.3006	1.39721	0.7027		1694	41	1774	25	1880	29	1880	29	0.901064
FT-31_70	106.944	6341.46	2.19292	6.15385	0.769231	9.74	1.54004	0.433	1.38568	0.77589		2320	54	2410	28	2481	25	2481	25	0.935107
FT-31_88	50.5986	18491.8	1.61342	5.71429	0.828571	10.87	1.56394	0.449	1.44766	0.65365		2393	57	2510	29	2604	28	2604	28	0.918971
FT-31_16	129.926	50322.1	2.28808	5.64972	0.762712	11.64	1.50344	0.478	1.35983	0.7592		2518	57	2575	28	2624	25	2624	25	0.959604
FT-31_72	91.688	5236.98	2.73461	5.40833	0.757166	12.18	1.51888	0.476	1.36555	0.7329		2509	57	2617	28	2695	25	2695	25	0.930983
FT-31_51	7.73854	3050.3	2.70709	5.32198	1.22406	12.63	1.82106	0.489	1.53374	0.51811		2560	66	2642	33	2703	40	2703	40	0.947096
FT-31_102	44.7231	10655.8	1.47722	5.35332	0.829764	12.68	1.57729	0.494	1.417	0.71248		2586	60	2653	29	2711	27	2711	27	0.953892
FT-31_124	39.0277	1094.74	2.01329	5.30504	0.848806	12.16	1.5625	0.477	1.46751	0.78537		2511	59	2614	29	2725	28	2725	28	0.921468
FT-31_80	82.5181	32478.7	1.61487	5.28262	0.76598	12.57	1.51154	0.48	1.35417	0.6755		2526	58	2646	28	2734	25	2734	25	0.923921
FT-31_110	185.629	76618.9	2.17002	4.89476	0.734214	14.5	1.51724	0.519	1.34875	0.82781		2693	61	2782	29	2860	24	2860	24	0.941608
Sample FT-31 (rejected analyses = 56/125)
FT-31_49	624.797	932.183	3.86041	12.4378	0.870647	0.66	1.74242	0.0595	1.59664	0.83378		372	11	513	14	1201	35	372	11	0.309742	b
FT-31_93	638.769	998.301	3.4114	6.64011	0.863214	1.419	2.57223	0.0672	2.15774	0.98291		418	18	881	29	2349	29	418	18	0.177948	b, e
FT-31_63	462.35	2333.69	1.49499	12.4069	0.868486	0.835	2.09581	0.0746	1.87668	0.94392		463	17	611	19	1205	34	463	17	0.384232
FT-31_96	411.211	2280.83	4.00075	12.1359	0.910194	0.909	2.36524	0.0796	2.13568	0.96006		493	21	647	24	1251	35	493	21	0.394085	e
FT-31_58	466.259	1672.11	4.03543	10.4493	0.888192	1.11	2.92793	0.0834	2.75779	0.97775		515	27	744	32	1542	33	515	27	0.333982	e
FT-31_37	294.44	2439.87	2.65212	14.0845	0.985915	0.94	2.34043	0.0941	2.2848	0.85603		578	25	663	24	944	41	578	25	0.612288	e
FT-31_35	877.14	2346.89	1.92181	10.8342	0.758397	1.388	2.23343	0.1082	2.03327	0.98287		661	25	873	26	1470	30	661	25	0.44966
FT-31_2	528.962	4558.47	2.51896	10.5263	0.842105	1.505	2.22591	0.1161	1.93798	0.96092		707	26	931	28	1524	33	707	26	0.463911	c
FT-31_91	118.435	10574.3	7.13378	9.18274	2.43343	1.8	7.22222	0.119	6.30252	0.95932		718	86	1001	87	1754	87	718	86	0.40935	c, d, e, i
FT-31_9	460.41	5112.57	2.18635	11.6959	0.760234	1.457	2.53946	0.1234	2.3906	0.98423		747	34	895	31	1326	30	747	34	0.563348
FT-31_65	215.715	23579.8	2.94174	12.5156	0.876095	1.476	1.62602	0.1338	1.4574	0.69707		809	22	919	19	1186	35	809	22	0.682125
FT-31_112	449.981	1567.38	3.27313	5.90319	0.914994	3.28	1.98171	0.1403	1.63934	0.80482		846	26	1472	29	2549	30	846	26	0.331895	c, e
FT-31_56	137.367	13354.1	1.92311	5.65291	2.6286	3.65	4.10959	0.147	2.72109	0.37663		883	45	1541	63	2600	82	883	45	0.339615	c, d
FT-31_114	209.045	2792.68	2.55194	13.2626	0.862069	1.595	1.66144	0.1544	1.52202	0.79666		925	26	966	20	1076	36	1076	36	0.859665
FT-31_123	54.1413	1475.63	6.92028	12.987	1.16883	1.734	1.81661	0.1647	1.45719	0.6001		982	26	1016	23	1106	45	1106	45	0.887884
FT-31_25	213.754	1944.48	2.5917	12.8535	0.899743	1.764	1.5873	0.1638	1.37363	0.4969		978	25	1031	21	1133	35	1133	35	0.863195	g
FT-31_95	111.44	4457.02	4.13375	12.8041	0.960307	1.855	1.6442	0.172	1.39535	0.44559		1023	27	1063	21	1141	39	1141	39	0.896582	e
FT-31_64	28.7997	1582.49	1.09295	12.4378	1.36816	1.899	1.92206	0.1708	1.55152	0.32742		1016	29	1075	26	1176	55	1176	55	0.863946
FT-31_15	177.982	24967.4	2.19635	12.5945	0.881612	1.911	1.56986	0.1746	1.37457	0.49494		1037	26	1084	21	1183	37	1183	37	0.876585
FT-31_57	290.788	38047.8	1.98314	12.5786	0.81761	1.776	1.77365	0.1611	1.6139	0.90886		962	29	1032	23	1184	33	1184	33	0.8125
FT-31_23	314.403	6318.53	0.474088	11.655	0.815851	1.909	2.01676	0.1614	1.85874	0.95786		965	34	1082	29	1329	31	1329	31	0.72611
FT-31_106	607.654	2494.26	1.47881	11.6822	0.759346	2.043	2.00685	0.1739	1.86889	0.98111		1031	36	1120	28	1329	30	1329	30	0.775771
FT-31_109	217.201	3056.09	2.61549	11.6279	0.813953	2.22	1.55405	0.1886	1.37858	0.63887		1114	28	1186	22	1333	32	1333	32	0.835709
FT-31_113	343.169	10855.4	1.62108	11.5607	0.751445	2.395	1.52401	0.2022	1.38477	0.77403		1187	30	1240	22	1348	30	1348	30	0.880564
FT-31_12	253.667	40387.1	1.47836	11.4548	0.801833	2.352	1.55187	0.1959	1.40378	0.70465		1153	29	1226	22	1365	31	1365	31	0.844689
FT-31_5	276.308	44539.1	8.75945	9.88142	0.889328	2.99	1.83946	0.2148	1.60615	0.85616		1253	37	1403	27	1644	33	1644	33	0.762165	c
FT-31_52	156.664	33658.1	3.01125	9.7561	0.829268	3.71	1.61725	0.2616	1.50994	0.86016		1496	41	1569	27	1665	30	1665	30	0.898498
FT-31_122	530.557	2168.07	3.41089	9.62464	0.962464	2.25	1.84444	0.159	1.60377	0.81044		951	28	1195	26	1693	36	1693	36	0.561725	a, d
FT-31_97	618.309	1429.47	5.31111	9.60615	0.768492	2.23	2.24215	0.1548	2.09948	0.98822		925	36	1175	32	1698	29	1698	29	0.544759	b
FT-31_13	521.307	7329.17	4.89798	9.58773	0.814957	2.79	3.04659	0.193	2.84974	0.99145		1130	60	1319	50	1702	29	1702	29	0.663925	c, i
FT-31_89	82.7666	16137.5	2.2473	9.5057	0.903042	3.52	1.5625	0.2425	1.40206	0.48242		1399	35	1531	25	1712	33	1712	33	0.817173
FT-31_14	328.082	25888.6	1.44739	9.49668	0.759734	2.993	1.63715	0.2065	1.50121	0.89283		1209	33	1402	25	1719	29	1719	29	0.703316
FT-31_41	395.974	5672.69	2.1263	9.46074	0.756859	2.392	1.56773	0.1633	1.43907	0.83232		974	26	1238	22	1726	28	1726	28	0.564311
FT-31_11	341.592	5084.54	3.82108	9.40734	0.940734	3.84	1.82292	0.2623	1.54403	0.82232		1501	41	1597	29	1734	34	1734	34	0.865629	c, d, f
FT-31_78	203.838	44313.6	2.06194	9.37207	0.796626	3.94	1.52284	0.2671	1.36653	0.64922		1526	37	1621	25	1741	28	1741	28	0.876508
FT-31_90	422.927	87901.3	2.65909	9.3633	0.749064	3.78	1.5873	0.2556	1.38889	0.84043		1467	36	1587	24	1745	27	1745	27	0.840688
FT-31_94	424.213	5310.04	2.81618	9.31966	0.745573	3.46	1.44509	0.2333	1.37162	0.79656		1351	34	1516	24	1753	28	1753	28	0.770679
FT-31_24	187.032	39386.1	1.72837	9.30233	0.790698	3.87	1.55039	0.2609	1.36067	0.58856		1494	36	1607	24	1754	28	1754	28	0.851767
FT-31_54	332.873	71721.1	1.96075	9.31099	0.744879	3.93	1.52672	0.2645	1.37996	0.80518		1512	38	1620	24	1754	28	1754	28	0.86203
FT-31_43	320.826	69055	2.8478	9.25069	0.740056	3.97	1.51134	0.2646	1.37944	0.82814		1513	38	1626	25	1765	28	1765	28	0.857224
FT-31_92	190.259	37589.2	2.70476	9.17431	0.779817	3.68	1.90217	0.2448	1.79739	0.95511		1408	45	1557	30	1779	29	1779	29	0.791456
FT-31_7	22.5265	4083.5	4.09945	8.40336	10.084	4.4	12.5	0.275	7.27273	0.50411		1560	200	1660	190	1810	390	1810	390	0.861878	c, d
FT-31_38	303.039	5016.7	2.93297	8.86525	0.753546	3.8	1.57895	0.2426	1.40148	0.79842		1400	35	1590	25	1842	28	1842	28	0.760043
FT-31_48	68.043	235.141	45.842	6.94444	6.94444	5.45	9.08257	0.279	7.16846	0.74636		1580	200	1850	170	2200	290	2200	290	0.718182	c, d
FT-31_100	31.5522	1471.85	1.94898	6.32911	7.91139	5.3	7.54717	0.251	4.98008	0.4313		1440	130	1840	130	2340	260	2340	260	0.615385	c, d
FT-31_83	13.063	1412.45	1.75685	5.98444	1.46619	4.82	2.07469	0.2109	1.75439	0.55293		1234	39	1777	35	2507	49	2507	49	0.492222
FT-31_30	276.17	4003.95	3.60368	5.80046	0.783063	5.76	2.51736	0.241	2.28216	0.98635		1382	59	1912	46	2579	26	2579	26	0.535867	c, i
FT-31_10	274.784	94699.3	5.30454	5.76037	0.806452	10.17	1.47493	0.427	1.40515	0.49729		2290	53	2450	28	2590	26	2590	26	0.88417	g
FT-31_53	227.041	5379.04	0.411086	5.74053	1.14811	5.59	5.36673	0.215	5.11628	0.99708		1210	110	1650	110	2594	38	2594	38	0.466461	i
FT-31_28	102.63	34718.5	1.69204	5.6338	0.760563	10.29	1.55491	0.419	1.43198	0.85782		2257	56	2462	28	2628	26	2628	26	0.858828
FT-31_59	122.619	38718.7	1.81825	5.58036	0.753348	9.58	1.56576	0.387	1.42119	0.81684		2106	51	2393	29	2644	25	2644	25	0.79652
FT-31_36	137.016	11073.7	1.96679	5.55556	0.75	11.05	1.49321	0.443	1.3544	0.73285		2363	54	2526	28	2652	25	2652	25	0.891026
FT-31_104	139.968	44810	1.32267	5.50358	0.770501	9.97	1.60481	0.399	1.50376	0.90679		2164	54	2427	30	2668	25	2668	25	0.811094
FT-31_8	73.8053	21274.1	1.87592	5.48847	0.823271	9.06	2.15232	0.361	2.07756	0.96242		1974	69	2320	40	2669	27	2669	27	0.739603	i
FT-31_55	111.79	7281.67	3.36746	5.45852	0.764192	11.04	1.53986	0.437	1.373	0.77648		2334	55	2525	28	2681	25	2681	25	0.870571
FT-31_105	177.362	7559.51	3.33923	5.08906	0.763359	9.76	1.7418	0.361	1.52355	0.95691		1984	54	2403	33	2797	24	2797	24	0.709331
Table footnotes:
1. Best age is determined from 206Pb/238U age for analyses with 206Pb/238U age <900 Ma and from 206Pb/207Pb age for analyses with 206Pb/238Uage >900 Ma.
2. Concordance is based on 206Pb/238U age / 206Pb/207Pb age.
3. Analyses with >10% discordance (<90% concordant) or >5% reverse discordance (>105% concordant) are "rejected" in this table.
4. All uncertainties include only measurement errors.
5. Systematic errors (~2% at 2σ) are not added above, but include uncertainty in calibration correction, initial Pb composition, decay constants, & error of std age.
6. Analyses were determined at the University of California–Santa Cruz using an Element XR high-resolution single-collector magnetic-sector ICP-MS coupled to a Photon Machines Analyte.H 193 nm ArF excimer laser with a Helex 2-volume laser ablation cell (following analytical procedures described in Sharman et al. 2013).
A laser spot size of ~26 microns was used. Laser energy was stabilized at 4.5 mJ and attenuated 30-40%, with an 8 Hz repetition rate.
Each analysis consisted of measurement of background (30 s, laser off), sample ablation (30 s, laser on), and instrument washout (20 s, laser off).
Age calibration was determined with respect to analyses of the standard zircon R33 (419 Ma: Black et al. 2004), assessed after every set of five unknowns and also bracketing the beginning and end of each session.
A control on session accuracy and precision was provided by analyses of a second standard zircon, Plešovice (337 Ma; Sláma et al. 2008), assessed after every set of ten unknowns.
U and U/Th concentrations were calculated using a correction factor empirically determined as the mean-of-ratios of the measured compositions for standard zircons R33 and Plešovice, to which were assigned U compositions of 175 and 755 ppm and Th compositions of 105 and 78 ppm, respectively (as in standard files of Patton et al. 2010; actual reported range: 61-398 ppm U for R33, Black et al. 2004;…
Geochronological data were reduced using Iolite with the Geochronology3 data reduction scheme (version 2.5, Paton et al. 2010).
No common Pb correction was applied
Integration windows within Iolite were trimmed forward to remove the effects of drill-through, spikes in 204Pb, or mixing of distinct age domains as noted in the Iolite trim Comments column.
7. *Atypical signal or integration windows noted during data processing:
a = trimmed forward to exclude apparent 204Pb spike
b = elevated or irregular 204Pb signal
c = trimmed forward to exclude drill through into epoxy
d = trimmed integration window is shorter than 10 seconds
e = visually identified irregularity in 76 signal
f = visually identified slope in down-hole corrected 76 signal
g = visually identified zonation in 76 age
h = distinct age domains split into separate integrations
i = visually identified irregularity in 68 signal

## Sheet: S1B U-Pb ALC
Table S1B. U-Pb geochronologic analyses determined by LA-ICP-MS at the University of Arizona Laserchron Center
				Isotope ratios								Apparent ages (Ma)
Analysis	U	206Pb	U/Th	206Pb*	± 1σ	207Pb*	± 1σ	206Pb*	± 1σ	error		206Pb*	± 2σ	207Pb*	± 2σ	206Pb*	± 2σ	Best age	± 2σ	Conc
	(ppm)	204Pb		207Pb*	(%)	235U*	(%)	238U	(%)	corr.		238U*	(Ma)	235U	(Ma)	207Pb*	(Ma)	(Ma)	(Ma)	(%)
Sample FT-15 (accepted analyses = 70/100)
Spot 12	186.342	57993.9	1.70324	17.2145	1.50247	0.681379	3.30678	0.0850712	2.94574	0.890818		526.321	29.7761	527.607	27.2154	533.153	65.8016	526.321	29.7761	98.7186
Spot 70	790.225	64203.6	0.754162	17.2354	0.620832	0.684042	1.65741	0.0855071	1.53674	0.927194		528.911	15.6069	529.215	13.6718	530.546	27.2389	528.911	15.6069	99.6917
Spot 71	1409.65	64122.3	0.840784	17.2721	0.285347	0.688393	1.35223	0.0862346	1.32178	0.977482		533.229	13.529	531.835	11.1964	525.834	12.5542	533.229	13.529	101.407
Spot 61	395.844	50135.3	1.47709	17.2744	0.706229	0.700642	2.39457	0.0877803	2.28806	0.955519		542.396	23.8052	539.174	20.0348	525.552	30.9519	542.396	23.8052	103.205
Spot 58	43.2287	33984.9	1.60163	13.4782	2.1083	1.82309	3.67028	0.178214	3.00434	0.818558		1057.21	58.5891	1053.8	48.142	1046.76	85.075	1046.76	85.075	100.998
Spot 02	24.9109	24574	1.96385	13.2334	3.55123	1.97191	3.78804	0.189259	1.31833	0.348024		1117.36	27.0491	1105.96	51.0525	1083.58	142.475	1083.58	142.475	103.117
Spot 100	39.3358	25363.7	2.26658	13.1841	1.53622	1.86345	2.28946	0.178183	1.69754	0.74146		1057.04	33.0996	1068.21	30.2588	1091.06	61.5417	1091.06	61.5417	96.8819
Spot 53	492.794	12170.5	0.701756	13.0937	0.414249	1.82459	8.25941	0.173271	8.24901	0.998741		1030.11	157.072	1054.34	108.451	1104.84	16.5231	1104.84	16.5231	93.2364
Spot 18	371.87	19669.4	1.39996	13.0922	0.368866	1.78661	1.53967	0.169645	1.49483	0.970878		1010.15	27.9529	1040.59	20.0472	1105.06	14.7344	1105.06	14.7344	91.4117
Spot 68	82.8368	32234.5	0.640506	11.7987	0.799768	2.57684	1.55794	0.220507	1.33699	0.858179		1284.55	31.1428	1294.09	22.7937	1309.92	31.0417	1309.92	31.0417	98.0636
Spot 86	125.561	31595	1.29203	11.5257	0.491483	2.84998	0.814268	0.238236	0.649212	0.797296		1377.52	16.1042	1368.81	12.241	1355.22	18.9534	1355.22	18.9534	101.646
Spot 74	39.1838	36178.9	1.34402	11.4588	1.50116	2.92427	2.91714	0.243028	2.50124	0.85743		1402.42	63.0496	1388.21	44.1513	1366.42	57.8101	1366.42	57.8101	102.634
Spot 11	99.1385	28070.6	0.679309	11.4424	1.01186	2.85751	1.59785	0.23714	1.23663	0.773934		1371.81	30.5614	1370.79	24.0379	1369.19	38.9504	1369.19	38.9504	100.192
Spot 65	198.722	23598.4	0.662009	11.4351	0.343366	2.86873	2.29291	0.237918	2.26706	0.988724		1375.87	56.1758	1373.74	34.5311	1370.42	13.2169	1370.42	13.2169	100.398
Spot 46	113.21	36931	1.05783	11.3828	0.601985	2.8532	2.03053	0.235549	1.93925	0.955043		1363.51	47.6655	1369.65	30.5361	1379.22	23.139	1379.22	23.139	98.861
Spot 30	94.3746	59003.5	0.876848	11.3541	0.851912	2.75826	2.68537	0.227136	2.54665	0.948344		1319.47	60.7736	1344.32	40.0284	1384.08	32.7243	1384.08	32.7243	95.3323
Spot 43	27.3634	24451.1	0.702502	11.2956	2.75586	2.90133	3.36816	0.237687	1.93643	0.57492		1374.66	47.9452	1382.26	50.8778	1393.99	105.74	1393.99	105.74	98.6133
Spot 25	119.891	77043.2	0.993088	11.147	0.639797	2.92018	1.05129	0.236083	0.834187	0.79349		1366.3	20.5414	1387.15	15.9036	1419.36	24.4584	1419.36	24.4584	96.2622
Spot 14	52.7283	71016.7	1.16649	11.1067	1.26772	3.08504	1.62832	0.248509	1.02191	0.627584		1430.78	26.2247	1428.98	24.9738	1426.28	48.4191	1426.28	48.4191	100.316
Spot 24	58.8808	19070.8	0.830898	11.0986	0.829377	3.23517	2.76163	0.260414	2.63415	0.953838		1491.96	70.1687	1465.63	42.8465	1427.66	31.6703	1427.66	31.6703	104.504
Spot 40	44.7063	27989.4	1.03869	11.0709	1.10753	3.18049	1.65873	0.255373	1.23482	0.744435		1466.12	32.3857	1452.43	25.6287	1432.44	42.2648	1432.44	42.2648	102.352
Spot 04	63.6862	56431.7	1.02051	11.055	1.36707	3.13007	2.21197	0.250963	1.73894	0.786151		1443.44	44.9781	1440.11	34.0468	1435.18	52.151	1435.18	52.151	100.576
Spot 79	38.0598	36096.1	1.44859	11.03	1.47632	3.23569	1.81421	0.258846	1.05443	0.581207		1483.93	27.9534	1465.75	28.1461	1439.49	56.2862	1439.49	56.2862	103.088
Spot 90	64.8893	53694.2	1.53651	11.0106	0.77881	3.22796	2.20741	0.257774	2.06545	0.935692		1478.44	54.576	1463.9	34.2279	1442.85	29.6783	1442.85	29.6783	102.467
Spot 64	116.93	50153.9	1.45395	11.0053	0.604106	3.16949	2.3493	0.252982	2.2703	0.966373		1453.83	59.0989	1449.76	36.2703	1443.77	23.0178	1443.77	23.0178	100.697
Spot 57	69.2846	49118.2	10.5463	10.9988	0.488464	2.92991	1.44324	0.233721	1.35806	0.940984		1353.97	33.1704	1389.67	21.8517	1444.89	18.6087	1444.89	18.6087	93.708
Spot 96	124.151	35107.6	1.29329	9.9008	0.437583	4.04509	1.28145	0.290468	1.20443	0.939891		1643.87	34.9527	1643.31	20.8659	1642.59	16.2416	1642.59	16.2416	100.078
Spot 35	170.357	88015.7	3.61644	9.61473	0.255805	4.05301	1.398	0.282627	1.3744	0.983117		1604.58	39.0459	1644.9	22.7726	1696.81	9.4292	1696.81	9.4292	94.5644
Spot 27	195.389	412611	5.03382	9.58406	0.260939	4.36514	0.962654	0.303422	0.926614	0.962562		1708.25	27.8105	1705.77	15.9058	1702.69	9.60787	1702.69	9.60787	100.327
Spot 80	62.7619	75269.4	2.69009	9.57081	0.70766	4.41867	1.59224	0.306718	1.42634	0.895808		1724.54	43.165	1715.85	26.3689	1705.24	26.0542	1705.24	26.0542	101.132
Spot 34	221.752	309252	2.10719	9.56461	0.286803	4.37232	1.24669	0.303304	1.21325	0.973179		1707.67	36.4027	1707.12	20.6055	1706.43	10.5556	1706.43	10.5556	100.073
Spot 28	55.9058	31037.3	1.75293	9.52248	0.544249	4.32194	1.37081	0.298488	1.25814	0.917807		1683.81	37.2879	1697.56	22.6081	1714.56	20.017	1714.56	20.017	98.2067
Spot 39	441.624	12687.6	2.26518	9.34434	1.22229	4.54095	9.91275	0.307747	9.8371	0.992369		1729.61	298.513	1738.5	165.339	1749.2	44.7578	1749.2	44.7578	98.88
Spot 99	34.4769	25828.9	0.865963	9.32039	1.34433	4.67478	2.20087	0.316005	1.74258	0.79177		1770.19	53.9487	1762.74	36.8226	1753.9	49.1987	1753.9	49.1987	100.929
Spot 08	193.694	38799.5	1.27762	9.27862	0.44485	4.23423	3.85804	0.284942	3.83231	0.99333		1616.21	109.57	1680.68	63.4	1762.11	16.2641	1762.11	16.2641	91.7197
Spot 87	373.212	18875.7	1.78163	9.24312	0.711362	4.43966	3.32246	0.297623	3.24542	0.97681		1679.51	95.9721	1719.77	55.0813	1769.12	25.982	1769.12	25.982	94.935
Spot 97	150.721	70567.2	2.23889	9.24158	0.495214	4.63355	1.89992	0.31057	1.83425	0.965434		1743.51	56.0413	1755.33	31.7368	1769.42	18.089	1769.42	18.089	98.5354
Spot 83	282.269	46080.1	0.884803	9.22704	0.211015	4.51533	1.9724	0.302169	1.96108	0.994261		1702.06	58.6718	1733.8	32.7952	1772.3	7.7051	1772.3	7.7051	96.0367
Spot 54	202.95	17847.9	2.08119	9.22527	0.303514	4.74433	2.88522	0.317433	2.86921	0.994451		1777.18	89.1336	1775.11	48.4012	1772.65	11.0822	1772.65	11.0822	100.256
Spot 85	433.516	129197	3.09901	9.21414	0.279799	4.90357	3.21957	0.327692	3.20739	0.996217		1827.19	102.065	1802.87	54.3199	1774.85	10.2098	1774.85	10.2098	102.949
Spot 72	144.5	158925	1.6339	9.20783	0.552692	4.6063	2.404	0.307616	2.3396	0.973213		1728.96	70.9615	1750.41	40.1168	1776.1	20.1683	1776.1	20.1683	97.3458
Spot 93	200.246	119881	1.44049	9.20574	0.327924	4.3777	4.65477	0.292283	4.6432	0.997515		1652.93	135.403	1708.14	76.9866	1776.52	11.9641	1776.52	11.9641	93.0431
Spot 29	73.2753	45585.1	0.939656	9.20431	0.53361	4.44259	0.763633	0.29657	0.546257	0.715339		1674.28	16.1093	1720.32	12.6585	1776.8	19.4702	1776.8	19.4702	94.2298
Spot 69	57.6937	41562.5	0.862746	9.1931	0.669717	4.76907	1.54646	0.317976	1.39392	0.901363		1779.84	43.3586	1779.47	25.9627	1779.03	24.4307	1779.03	24.4307	100.046
Spot 82	261.47	52976	1.439	9.19158	0.298087	4.44512	2.29615	0.296328	2.27672	0.991538		1673.07	67.0996	1720.79	38.0704	1779.33	10.8715	1779.33	10.8715	94.0285
Spot 31	210.281	76271.8	0.895811	9.18863	0.237165	4.69323	2.05792	0.312768	2.04421	0.993337		1754.31	62.7929	1766.03	34.4543	1779.91	8.64821	1779.91	8.64821	98.562
Spot 51	245.972	33340	1.04323	9.18742	0.220703	4.76657	0.655094	0.317613	0.616797	0.94154		1778.06	19.1691	1779.03	10.9966	1780.15	8.04744	1780.15	8.04744	99.8827
Spot 95	117.03	65559.9	0.756023	9.18632	0.369074	4.80708	0.909569	0.320274	0.831325	0.913976		1791.07	26.0002	1786.14	15.2907	1780.37	13.4595	1780.37	13.4595	100.601
Spot 76	178.261	350846	0.765553	9.18298	0.325736	4.86298	2.5651	0.32388	2.54434	0.991904		1808.65	80.2535	1795.86	43.213	1781.03	11.8777	1781.03	11.8777	101.551
Spot 89	443.25	203815	10.2924	9.18261	0.166336	4.89317	2.09001	0.325878	2.08339	0.996828		1818.37	66.0196	1801.08	35.2447	1781.1	6.06346	1781.1	6.06346	102.092
Spot 67	148.048	91808.7	1.12977	9.1791	0.297926	4.87591	1.52507	0.324604	1.49568	0.980733		1812.18	47.2561	1798.1	25.7011	1781.8	10.8623	1781.8	10.8623	101.705
Spot 20	134.167	140336	1.14961	9.17012	0.259227	4.83445	1.93199	0.321529	1.91452	0.990957		1797.19	60.0557	1790.91	32.5124	1783.58	9.44882	1783.58	9.44882	100.763
Spot 62	547.794	134988	4.80933	9.16939	0.127328	4.95219	1.50388	0.329333	1.49848	0.996409		1835.15	47.8632	1811.2	25.4106	1783.73	4.64279	1783.73	4.64279	102.883
Spot 01	533.899	303490	6.37185	9.16399	0.0513878	4.72143	1.22002	0.313802	1.21894	0.999113		1759.39	37.5367	1771.05	20.4461	1784.8	1.87352	1784.8	1.87352	98.5761
Spot 32	321.591	88849.6	3.38343	9.16336	0.15641	4.51387	1.00664	0.299987	0.994412	0.987855		1691.25	29.5855	1733.53	16.7354	1784.93	5.70238	1784.93	5.70238	94.7514
Spot 56	304.412	231973	1.26904	9.16114	0.198182	4.64957	0.959914	0.308931	0.939233	0.978455		1735.44	28.5803	1758.22	16.0435	1785.37	7.22491	1785.37	7.22491	97.2034
Spot 10	341.497	252524	3.36134	9.15878	0.0807633	4.85928	1.60911	0.322781	1.60708	0.99874		1803.3	50.56	1795.22	27.1018	1785.84	2.94413	1785.84	2.94413	100.977
Spot 44	501.28	237781	2.28681	9.15374	0.126836	4.72144	1.47969	0.313452	1.47424	0.996319		1757.67	45.3603	1771.05	24.7982	1786.84	4.62309	1786.84	4.62309	98.3674
Spot 07	153.09	245927	1.98719	9.15274	0.254712	4.79002	1.63373	0.317971	1.61375	0.987772		1779.81	50.1959	1783.15	27.4488	1787.04	9.28384	1787.04	9.28384	99.5953
Spot 81	689.083	688726	1.37054	9.15085	0.101674	4.86943	1.52821	0.323176	1.52482	0.997784		1805.22	48.0165	1796.98	25.7483	1787.42	3.70569	1787.42	3.70569	100.996
Spot 23	194.473	213127	1.41244	9.13983	0.219334	4.90482	1.17791	0.325132	1.15731	0.982511		1814.75	36.6099	1803.09	19.8701	1789.61	7.99182	1789.61	7.99182	101.404
Spot 45	97.9554	95145.1	1.60351	9.12612	0.392594	5.11332	1.22805	0.338445	1.16361	0.947523		1879.18	37.9352	1838.32	20.8602	1792.35	14.3001	1792.35	14.3001	104.845
Spot 19	121.022	82037.2	1.3826	9.12084	0.513231	4.72732	0.997646	0.312715	0.855507	0.857525		1754.05	26.2755	1772.1	16.7228	1793.4	18.6918	1793.4	18.6918	97.8058
Spot 91	112.693	82695.9	0.595154	9.01518	0.551845	4.95357	1.24531	0.323885	1.11636	0.896452		1808.68	35.2122	1811.43	21.0423	1814.59	20.0422	1814.59	20.0422	99.6739
Spot 75	379.461	49631.7	2.12625	8.839	0.179532	4.91947	4.08108	0.31537	4.07713	0.999032		1767.08	126.034	1805.6	68.9028	1850.36	6.49313	1850.36	6.49313	95.4994
Spot 21	61.3112	61591	1.85874	8.79563	0.642822	5.02169	3.81166	0.320343	3.75706	0.985677		1791.4	117.527	1822.99	64.5731	1859.24	23.2207	1859.24	23.2207	96.3512
Spot 22	58.4055	44651	1.9973	8.75119	0.555658	5.25212	1.78	0.33335	1.69105	0.950027		1854.6	54.5083	1861.12	30.3682	1868.39	20.0532	1868.39	20.0532	99.2618
Spot 26	144.773	155043	3.17198	8.73782	0.299277	5.31148	2.05259	0.336602	2.03066	0.989313		1870.3	65.9331	1870.71	35.0825	1871.15	10.7969	1871.15	10.7969	99.9548
Spot 78	102.104	109457	1.10559	5.5972	0.15352	12.3205	1.41738	0.500148	1.40904	0.994117		2614.43	60.5674	2629.14	26.6243	2640.47	5.09234	2640.47	5.09234	99.014
Spot 17	121.657	68083.2	0.850516	5.4583	0.153389	12.5653	2.10703	0.497424	2.10144	0.997347		2602.72	90.0025	2647.62	39.6396	2682.11	5.07431	2682.11	5.07431	97.0399
Sample FT-15 (rejected analyses = 30/100)
Spot 60	1373.78	24900.6	0.994285	17.3647	0.58042	0.538272	1.75039	0.0677901	1.65136	0.943422		422.828	13.5167	437.285	12.4385	514.113	25.5437	422.828	13.5167	82.2442
Spot 88	50.1209	2096.16	1.21559	19.3578	6.7522	0.610803	6.9311	0.0857544	1.5646	0.225736		530.379	15.9322	484.066	53.3852	270.307	309.935	530.379	15.9322	196.213
Spot 49	51.2529	2443.57	1.34197	19.293	9.41479	0.616551	9.74767	0.0862714	2.52566	0.259104		533.448	25.8614	487.683	75.5337	278.043	431.961	533.448	25.8614	191.858
Spot 59	601.047	12700.3	0.571749	13.5673	0.462381	1.1815	11.1888	0.116258	11.1792	0.999146		708.99	150.12	792.009	123.212	1033.43	18.6844	1033.43	18.6844	68.6054
Spot 37	767.685	12085.1	1.58441	13.4962	0.620684	1.16263	19.3984	0.113803	19.3885	0.999488		694.794	255.442	783.191	212.553	1044.04	25.0808	1044.04	25.0808	66.5489
Spot 38	300.987	19319.1	1.79818	13.3304	0.502987	1.52343	7.0696	0.147287	7.05168	0.997466		885.739	116.72	939.859	86.7262	1068.96	20.2157	1068.96	20.2157	82.8596
Spot 66	552.087	4363.58	2.20874	12.3916	1.73099	1.12787	7.51849	0.101365	7.31652	0.973136		622.401	86.8189	766.739	80.9721	1214.12	68.099	1214.12	68.099	51.2634
Spot 52	29.8908	4370.19	1.64373	11.8162	2.47393	2.78438	6.73811	0.238619	6.26752	0.93016		1379.51	155.68	1351.35	100.76	1307.04	96.0375	1307.04	96.0375	105.545
Spot 63	472.086	10341.5	0.654672	11.7596	0.676875	1.46741	8.89006	0.125154	8.86425	0.997097		760.158	127.126	917.062	107.468	1316.36	26.2501	1316.36	26.2501	57.7471
Spot 73	569.515	8188.89	1.85059	10.1427	0.556478	2.23128	4.14954	0.164136	4.11205	0.990967		979.723	74.7503	1190.92	58.2047	1597.67	20.7749	1597.67	20.7749	61.3219
Spot 42	260.302	23402.4	1.96787	9.88973	0.390843	3.07676	3.30308	0.220687	3.27988	0.992975		1285.5	76.451	1426.92	50.6346	1644.66	14.5029	1644.66	14.5029	78.1621
Spot 41	728.471	8439.63	7.11483	9.7896	0.727771	1.45567	9.51428	0.103354	9.4864	0.99707		634.035	114.571	912.221	114.654	1663.52	26.9371	1663.52	26.9371	38.1141
Spot 50	507.729	6636.78	3.35164	9.71737	2.75871	3.02985	9.33602	0.213535	8.91913	0.955346		1247.62	202.359	1415.17	142.781	1677.21	101.955	1677.21	101.955	74.3867
Spot 09	242.256	29011.7	1.05218	9.54101	0.299046	3.40865	2.56533	0.235871	2.54784	0.993182		1365.2	62.6939	1506.39	40.2844	1710.98	11.0036	1710.98	11.0036	79.7904
Spot 94	616.369	25114.5	15.6595	9.45178	0.567006	1.95318	16.4916	0.133892	16.4819	0.999409		810.029	250.953	1099.54	222.385	1728.25	20.818	1728.25	20.818	46.87
Spot 48	657.066	54507.7	8.21457	9.40887	0.422964	2.65285	3.68332	0.181029	3.65896	0.993385		1072.59	72.31	1315.44	54.3356	1736.6	15.5096	1736.6	15.5096	61.7642
Spot 84	172.235	20946.1	2.73092	9.35553	0.506701	3.4361	3.58699	0.233149	3.55102	0.989972		1350.98	86.5617	1512.69	56.4373	1747.01	18.5568	1747.01	18.5568	77.3309
Spot 92	781.658	57465.9	5.03087	9.33385	0.255043	3.25795	2.30544	0.220548	2.29129	0.993862		1284.77	53.3801	1471.07	35.8264	1751.26	9.33721	1751.26	9.33721	73.3628
Spot 13	149.104	37841.4	2.57246	9.31131	0.665357	2.53733	4.416	0.171351	4.36559	0.988584		1019.55	82.3375	1282.81	64.3482	1755.68	24.3457	1755.68	24.3457	58.0716
Spot 06	698.183	195497	6.84859	9.30709	1.5226	5.15935	7.7375	0.348263	7.58621	0.980447		1926.3	252.675	1845.94	131.804	1756.51	55.7021	1756.51	55.7021	109.666
Spot 05	79.4234	8045.91	2.13979	9.30514	1.59682	3.07616	4.74765	0.207601	4.47105	0.941741		1216.03	99.0999	1426.77	72.7917	1756.9	58.4153	1756.9	58.4153	69.2144
Spot 36	244.8	31657.1	1.77183	9.2846	0.265603	3.98189	2.3909	0.268133	2.3761	0.99381		1531.32	64.7744	1630.51	38.8123	1760.94	9.71206	1760.94	9.71206	86.9605
Spot 16	111.437	103133	1.83857	9.2669	0.427035	3.23136	7.60563	0.217179	7.59363	0.998422		1266.95	174.698	1464.71	118.084	1764.43	15.6083	1764.43	15.6083	71.8054
Spot 55	546.379	34290.5	3.88222	9.26077	0.835462	2.75362	4.20308	0.184948	4.11921	0.980045		1093.95	82.8932	1343.07	62.6353	1765.63	30.5286	1765.63	30.5286	61.958
Spot 15	275.452	44448.4	2.43795	9.25163	0.284975	3.43251	3.61083	0.230319	3.59957	0.996881		1336.17	86.8794	1511.87	56.7992	1767.44	10.412	1767.44	10.412	75.5992
Spot 77	373.149	51430.9	1.35218	9.22639	0.777818	5.12538	9.67332	0.34297	9.642	0.996762		1900.94	317.536	1840.32	164.733	1772.43	28.398	1772.43	28.398	107.251
Spot 33	89.4494	42611.1	0.844994	9.20381	0.523162	4.03743	5.58321	0.269508	5.55865	0.9956		1538.3	152.15	1641.77	90.9348	1776.9	19.0886	1776.9	19.0886	86.5722
Spot 03	982.857	2885.59	4.70452	7.44671	4.7318	1.23886	7.55913	0.0669092	5.89495	0.779846		417.507	47.6638	818.365	84.9924	2154.76	165.283	2154.76	165.283	19.376
Spot 98	144.965	46438	2.61689	5.86201	0.589394	9.49843	2.80082	0.403829	2.7381	0.977608		2186.64	101.552	2387.39	51.4713	2563.42	19.7219	2563.42	19.7219	85.3017
Spot 47	319.524	57029.1	2.23193	5.83427	0.538617	9.406	4.94151	0.398007	4.91207	0.994042		2159.85	180.311	2378.42	90.7674	2571.36	18.0087	2571.36	18.0087	83.9966
Sample FT-1 (accepted analyses = 53/80)
Spot 69	188.491	50427.1	1.05134	13.6867	0.807542	1.70325	1.36524	0.169074	1.1008	0.806304		1007.01	20.5254	1009.75	17.4692	1015.69	32.7228	1015.69	32.7228	99.1446
Spot 61	83.1927	18767	2.31522	13.6809	1.52421	1.70955	1.86474	0.169627	1.07426	0.576094		1010.06	20.0866	1012.12	23.8937	1016.56	61.7845	1016.56	61.7845	99.3602
Spot 62	196.131	33662.8	2.22242	13.6327	0.717391	1.61977	2.94188	0.160153	2.85307	0.969812		957.625	50.7787	977.903	36.9423	1023.71	29.0343	1023.71	29.0343	93.5447
Spot 15	116.023	27705.2	2.97515	13.6275	1.02609	1.7531	2.18804	0.17327	1.93253	0.883223		1030.1	36.7959	1028.31	28.2962	1024.47	41.5602	1024.47	41.5602	100.55
Spot 58	84.4955	49900.1	1.99395	13.608	0.905986	1.74144	1.84743	0.171871	1.61002	0.871495		1022.41	30.4442	1024	23.8329	1027.37	36.6846	1027.37	36.6846	99.5176
Spot 66	164.728	44821.9	1.84107	13.5744	1.03739	1.73152	1.27496	0.17047	0.741176	0.581332		1014.7	13.9174	1020.32	16.413	1032.37	41.9681	1032.37	41.9681	98.2885
Spot 40	134.602	47841.8	1.3156	13.5218	0.632824	1.80696	2.67913	0.177207	2.60332	0.971703		1051.7	50.5249	1047.98	35.0275	1040.22	25.5842	1040.22	25.5842	101.104
Spot 24	141.378	10948.4	1.62653	13.4054	0.790169	1.65589	2.34786	0.160994	2.2109	0.941666		962.296	39.5273	991.805	29.7292	1057.68	31.8531	1057.68	31.8531	90.9816
Spot 64	233.599	39224.8	1.86346	13.2925	0.459988	1.78057	1.84728	0.171658	1.7891	0.968501		1021.24	33.7945	1038.39	24.0237	1074.69	18.4359	1074.69	18.4359	95.0269
Spot 29	103.198	56535.2	0.410876	13.2614	0.927094	1.97315	1.05968	0.18978	0.513245	0.484339		1120.18	10.555	1106.38	14.2819	1079.35	37.1704	1079.35	37.1704	103.783
Spot 25	43.955	24994.1	0.692338	13.2547	2.7816	1.95469	3.15185	0.187908	1.48218	0.470258		1110.03	30.2283	1100.06	42.3501	1080.4	111.676	1080.4	111.676	102.743
Spot 31	125.345	77987.2	3.10295	13.2492	1.01285	1.86378	1.21952	0.179095	0.679247	0.556977		1062.03	13.3018	1068.33	16.1181	1081.21	40.6396	1081.21	40.6396	98.2255
Spot 55	84.8028	54078.1	0.943042	13.2434	0.90162	1.96682	2.378	0.188914	2.20044	0.925335		1115.49	45.079	1104.22	32.017	1082.09	36.1615	1082.09	36.1615	103.087
Spot 22	165.27	320025	2.65838	13.2357	0.630002	1.8827	1.00619	0.180728	0.784552	0.779723		1070.95	15.4827	1075.01	13.3453	1083.24	25.2295	1083.24	25.2295	98.8654
Spot 56	163.446	95638.9	2.87724	13.1421	0.836219	1.85541	2.49976	0.17685	2.35575	0.942389		1049.74	45.6417	1065.35	32.9889	1097.47	33.4723	1097.47	33.4723	95.6506
Spot 01	363.354	58614.2	1.25876	13.0555	0.441105	1.86209	1.92871	0.176316	1.87759	0.973496		1046.82	36.2842	1067.73	25.484	1110.68	17.6195	1110.68	17.6195	94.2499
Spot 18	65.5349	30263.4	0.956048	13.0358	0.915203	1.96844	1.29306	0.186104	0.913459	0.706432		1100.24	18.4787	1104.77	17.4134	1113.69	36.5064	1113.69	36.5064	98.7916
Spot 10	113.89	40425.8	1.05028	12.941	0.7407	2.07551	1.85824	0.1948	1.70424	0.917124		1147.33	35.824	1140.75	25.4678	1128.28	29.5381	1128.28	29.5381	101.688
Spot 60	156.42	8727.29	1.91765	12.8015	5.19422	2.07433	7.37304	0.192592	5.23276	0.709715		1135.4	108.952	1140.37	101.11	1149.81	206.396	1149.81	206.396	98.7469
Spot 80	292.235	68174	1.43492	12.7758	0.501107	2.07326	2.24775	0.192106	2.19118	0.974833		1132.77	45.5254	1140.01	30.7961	1153.79	19.874	1153.79	19.874	98.1782
Spot 70	80.6188	116600	1.28331	12.7746	0.963504	2.02126	1.1195	0.187271	0.570032	0.509186		1106.57	11.5923	1122.68	15.2099	1153.98	38.282	1153.98	38.282	95.8922
Spot 28	162.312	128201	1.6618	12.6708	0.556369	2.16959	1.31881	0.19938	1.19571	0.906656		1171.99	25.627	1171.35	18.3328	1170.15	22.0695	1170.15	22.0695	100.157
Spot 75	57.3535	53321.8	0.292989	12.4596	2.11792	2.26654	2.67806	0.204817	1.63903	0.612021		1201.15	35.9236	1201.94	37.7403	1203.35	83.4743	1203.35	83.4743	99.817
Spot 30	130.628	12721.4	1.52427	12.1516	1.09016	2.29374	1.50704	0.202151	1.04055	0.690455		1186.87	22.5594	1210.36	21.3136	1252.5	42.6229	1252.5	42.6229	94.76
Spot 78	41.7948	27165.6	1.62808	11.731	1.72934	2.67949	2.27218	0.227975	1.47383	0.648641		1323.88	35.2772	1322.81	33.6052	1321.08	67.0199	1321.08	67.0199	100.212
Spot 79	48.4805	15550.9	1.30577	11.607	1.67056	2.77531	2.3597	0.233631	1.66656	0.706258		1353.5	40.6926	1348.92	35.2305	1341.64	64.5583	1341.64	64.5583	100.884
Spot 26	84.5813	75199.8	0.804057	11.4428	1.08884	2.89688	1.51209	0.240415	1.0492	0.693876		1388.85	26.2181	1381.1	22.828	1369.12	41.9141	1369.12	41.9141	101.442
Spot 49	138.339	61817.4	1.52794	11.4358	0.58374	2.63621	2.13739	0.218648	2.05613	0.961983		1274.73	47.5628	1310.8	31.4709	1370.3	22.4678	1370.3	22.4678	93.0253
Spot 41	38.7296	26295.4	0.679036	11.4146	1.04892	2.87705	1.43072	0.238181	0.973001	0.680077		1377.24	24.1316	1375.92	21.5614	1373.86	40.3512	1373.86	40.3512	100.246
Spot 34	114.95	51960.4	0.883294	11.3799	0.457651	2.76624	6.29486	0.228311	6.2782	0.997354		1325.64	150.46	1346.48	93.9588	1379.72	17.5899	1379.72	17.5899	96.08
Spot 53	150.013	132616	0.954762	11.3697	0.660809	2.89886	2.03516	0.239042	1.92489	0.945818		1381.71	47.8789	1381.62	30.7313	1381.45	25.3924	1381.45	25.3924	100.019
Spot 05	38.4714	22060.7	0.501414	11.3465	1.95158	2.94356	2.41105	0.242234	1.41581	0.587217		1398.3	35.5948	1393.19	36.5509	1385.36	74.9604	1385.36	74.9604	100.934
Spot 77	128.1	101127	1.04467	11.3255	0.471287	2.86337	1.47088	0.235197	1.39334	0.947279		1361.68	34.2059	1372.33	22.1394	1388.93	18.0912	1388.93	18.0912	98.038
Spot 54	166.028	15456.3	1.18864	11.277	1.22065	2.98106	3.46766	0.243817	3.24571	0.935996		1406.51	82.0297	1402.8	52.7431	1397.15	46.8059	1397.15	46.8059	100.67
Spot 65	52.6815	21617.9	0.704841	11.1868	3.30301	2.96543	8.65288	0.240599	7.99766	0.924277		1389.81	199.99	1398.81	131.591	1412.53	126.42	1412.53	126.42	98.3915
Spot 48	313.987	132948	1.6249	11.0655	0.321504	2.8657	2.61719	0.229985	2.59737	0.992426		1334.42	62.6159	1372.94	39.4051	1433.37	12.2672	1433.37	12.2672	93.0966
Spot 45	62.0337	47093.5	0.710634	10.8709	1.505	3.22167	1.67356	0.254008	0.731975	0.437375		1459.11	19.1157	1462.39	25.9372	1467.13	57.1665	1467.13	57.1665	99.4534
Spot 71	183.717	96185.6	1.64747	10.866	0.281178	3.06971	1.03843	0.241916	0.99964	0.962643		1396.65	25.1052	1425.16	15.9067	1468	10.6786	1468	10.6786	95.1395
Spot 13	123.802	72175.5	2.10105	10.8426	0.671807	3.2811	0.955293	0.258018	0.679162	0.710946		1479.7	17.9591	1476.58	14.8685	1472.09	25.5	1472.09	25.5	100.517
Spot 02	88.622	10150.1	1.38153	10.7277	0.870548	3.37031	2.52488	0.262225	2.37006	0.938681		1501.21	63.4816	1497.52	39.547	1492.28	32.9547	1492.28	32.9547	100.599
Spot 06	40.044	4073.15	1.12021	10.6287	4.23045	3.46107	4.54501	0.266802	1.66144	0.365554		1524.55	45.1146	1518.39	71.6385	1509.8	159.833	1509.8	159.833	100.977
Spot 23	81.675	8658.08	1.58779	10.3821	15.023	3.33341	16.353	0.250998	6.45996	0.395031		1443.62	167.115	1488.91	256.817	1554.01	567.268	1554.01	567.268	92.8966
Spot 04	57.5143	76989	0.828282	9.81919	0.75472	4.17413	1.77848	0.297263	1.6104	0.905493		1677.72	47.5771	1668.96	29.1386	1657.93	27.9546	1657.93	27.9546	101.193
Spot 11	184.28	41099	3.52862	9.59756	0.22045	4.36389	4.23671	0.303762	4.23097	0.998645		1709.94	127.098	1705.53	70.0252	1700.1	8.11912	1700.1	8.11912	100.579
Spot 16	99.8182	160087	0.537205	9.23901	0.524321	4.18972	0.946117	0.280743	0.787543	0.832395		1595.1	22.2572	1672.01	15.5115	1769.93	19.151	1769.93	19.151	90.1223
Spot 07	203.003	44420.7	2.04105	9.17211	0.278679	4.63082	1.91547	0.308053	1.89509	0.98936		1731.12	57.5416	1754.84	31.9932	1783.19	10.1586	1783.19	10.1586	97.0801
Spot 44	114.013	74407.4	0.796568	9.02435	0.379658	4.4685	2.75638	0.292467	2.73011	0.990469		1653.84	79.6508	1725.14	45.7473	1812.75	13.7905	1812.75	13.7905	91.2341
Spot 37	123.988	74987	2.14122	8.85094	0.425076	5.18446	1.019	0.332806	0.926105	0.908837		1851.97	29.8149	1850.07	17.3479	1847.92	15.3746	1847.92	15.3746	100.219
Spot 36	52.8376	108809	2.45619	8.809	1.00497	5.25849	1.15136	0.335959	0.561842	0.48798		1867.2	18.2161	1862.15	19.6461	1856.5	36.3172	1856.5	36.3172	100.576
Spot 46	136.797	24958	1.03811	8.79666	0.441929	4.70562	1.78786	0.300216	1.73238	0.968969		1692.38	51.5717	1768.24	29.946	1859.03	15.963	1859.03	15.963	91.0355
Spot 42	104.623	62251.1	1.20984	5.46853	0.19763	11.9941	2.6155	0.475705	2.60803	0.997141		2508.53	108.395	2603.95	49.0367	2679.01	6.5398	2679.01	6.5398	93.6364
Spot 08	90.1071	45476.2	1.92242	5.44806	0.274124	12.6568	4.1542	0.500109	4.14514	0.99782		2614.26	178.179	2654.45	78.2234	2685.21	9.0592	2685.21	9.0592	97.3578
Spot 09	41.2607	71313.1	0.592718	5.17361	0.286589	13.5849	0.839225	0.509741	0.788775	0.939885		2655.52	34.336	2721.21	15.8745	2770.34	9.40354	2770.34	9.40354	95.8557
Sample FT-1 (rejected analyses = 27/80)
Spot 38	415.351	22089.1	2.3236	20.4778	2.69623	0.172837	5.75418	0.0256695	5.0834	0.883427		163.388	16.4026	161.878	17.2208	139.839	126.64	163.388	16.4026	116.84
Spot 32	400.713	8142.69	1.83654	6.29811	2.56387	0.648599	294.068	0.0296268	294.057	0.999962		188.212	n.d.	507.616	n.d.	2442.67	86.8297	188.212	1093.51	7.70517
Spot 20	576.678	19653.6	3.74586	14.3077	2.99281	0.39178	10.1621	0.0406546	9.71142	0.955649		256.89	48.9144	335.669	58.1078	925.203	122.951	256.89	48.9144	27.7658
Spot 35	176.551	2889.25	4.28946	12.3994	11.0644	0.521135	15.674	0.0468652	11.102	0.708305		295.247	64.0785	425.909	109.154	1212.89	436.726	295.247	64.0785	24.3425
Spot 74	509.734	11993.9	3.52109	13.4088	3.29451	0.743059	4.37129	0.0722626	2.87305	0.657254		449.772	24.9634	564.189	37.847	1057.16	132.682	449.772	24.9634	42.5453
Spot 12	14.1642	7834.04	0.933719	13.9136	6.93699	1.76088	8.1237	0.177692	4.22759	0.520403		1054.35	82.2399	1031.17	105.314	982.342	282.841	982.342	282.841	107.33
Spot 14	465.665	70379.9	1.81818	13.3864	1.83082	1.03989	36.6189	0.10096	36.5731	0.998749		620.03	432.563	723.86	383.59	1060.53	73.6886	1060.53	73.6886	58.4639
Spot 59	615.327	12431.5	1.67572	13.2444	1.10748	0.9623	2.68431	0.092436	2.44521	0.910924		569.928	26.6753	684.487	26.734	1081.94	44.4225	1081.94	44.4225	52.6763
Spot 21	140.971	93290.8	0.836489	13.0173	0.698977	1.78498	11.9055	0.168521	11.8849	0.998275		1003.96	221.006	1040	155.261	1116.56	27.8995	1116.56	27.8995	89.9151
Spot 43	598.137	8095	1.7658	13.0135	0.785844	1.29229	5.42512	0.121969	5.3679	0.989453		741.889	75.2363	842.312	62.129	1117.15	31.3932	1117.15	31.3932	66.4091
Spot 63	511.338	44059.9	4.11088	12.697	0.324938	1.635	2.66581	0.150563	2.64594	0.992544		904.118	44.6413	983.788	33.5944	1166.06	12.9117	1166.06	12.9117	77.5362
Spot 67	198.126	25012.8	1.71161	12.5563	2.05655	1.82279	20.8696	0.165995	20.768	0.995133		990.008	381.301	1053.69	275.348	1188.14	81.2206	1188.14	81.2206	83.3239
Spot 73	553.611	2324.4	2.14413	12.1782	3.31918	0.78014	10.0024	0.0689059	9.43566	0.943337		429.56	78.4228	585.563	89.0763	1248.21	129.958	1248.21	129.958	34.4141
Spot 17	244.045	19411	0.894608	11.8426	0.655382	1.74291	7.18185	0.1497	7.15188	0.995828		899.281	120.065	1024.54	92.7388	1302.71	25.4621	1302.71	25.4621	69.0315
Spot 47	639.865	69698.3	15.7157	11.5741	0.132077	2.37912	2.6475	0.199712	2.6442	0.998755		1173.77	56.7507	1236.35	37.858	1347.12	5.099	1347.12	5.099	87.1318
Spot 50	145.595	28129.8	0.867814	11.3633	0.530308	2.34042	6.40611	0.192884	6.38412	0.996568		1136.98	133.096	1224.65	91.2092	1382.52	20.3747	1382.52	20.3747	82.2398
Spot 33	245.883	9761.44	1.88999	11.2459	0.961603	2.25292	10.3477	0.183754	10.303	0.995673		1087.45	206.216	1197.7	145.788	1402.45	36.8456	1402.45	36.8456	77.5392
Spot 19	208.513	11018.8	1.99789	11.0187	0.689909	2.48895	4.0559	0.198906	3.99679	0.985427		1169.44	85.4924	1268.82	58.7746	1441.44	26.2954	1441.44	26.2954	81.1298
Spot 68	281.369	45689.5	1.1777	9.512	0.308917	3.79849	2.46334	0.262048	2.44389	0.992106		1500.31	65.4243	1592.43	39.6046	1716.58	11.3587	1716.58	11.3587	87.4012
Spot 52	250.183	29796.6	0.667448	9.24289	0.364602	4.98192	7.49416	0.333967	7.48529	0.998816		1857.58	241.638	1816.26	126.912	1769.16	13.3184	1769.16	13.3184	104.997
Spot 03	170.434	59746.5	5.09223	9.2913	1.26635	3.01097	10.8829	0.2029	10.809	0.993207		1190.88	235.09	1410.4	166.277	1759.62	46.3075	1759.62	46.3075	67.6783
Spot 51	164.151	11339.9	1.72807	9.17771	0.838536	2.55889	5.22296	0.170327	5.15521	0.987028		1013.91	96.7341	1288.98	76.2988	1782.08	30.5787	1782.08	30.5787	56.8951
Spot 72	478.722	3469.36	1.31836	6.47883	0.567968	1.63139	6.52662	0.0766572	6.50185	0.996206		476.139	59.6849	982.396	82.2163	2394.66	19.3292	2394.66	19.3292	19.8834
Spot 27	272.916	8622.55	0.883915	6.15972	0.3459	6.50789	1.4891	0.290737	1.44837	0.972647		1645.21	42.0621	2046.97	26.2138	2480.22	11.6698	2480.22	11.6698	66.3333
Spot 57	288.483	7341.49	1.21917	5.9731	0.312734	4.97118	5.19917	0.215356	5.18976	0.998189		1257.29	118.566	1814.43	87.9558	2531.97	10.4966	2531.97	10.4966	49.6565
Spot 76	208.228	42825.9	1.01874	5.71681	0.227808	9.005	2.98086	0.373367	2.97214	0.997075		2045.22	104.178	2338.51	54.4969	2605.3	7.59184	2605.3	7.59184	78.5026
Spot 39	97.6101	19441.8	1.90469	5.57414	0.8746	8.32803	6.88776	0.336681	6.83201	0.991905		1870.68	221.886	2267.37	125.037	2647.32	29.0233	2647.32	29.0233	70.6634
Sample SR-260 (accepted analyses = 10/30)
Spot 06	403.917	48835.9	4.80164	20.4051	2.87827	0.164293	3.48557	0.024314	1.96591	0.564014		154.863	6.01638	154.454	9.98838	148.184	135.028	154.863	6.01638	104.507
Spot 15	1129.48	283296	3.46041	20.3697	0.804515	0.166748	1.22889	0.0246346	0.928939	0.755917		156.88	2.87946	156.593	3.56663	152.272	37.6706	156.88	2.87946	103.026
Spot 29	272.928	8016.71	1.45627	20.175	2.75057	0.170005	3.00901	0.0248757	1.22004	0.405463		158.397	3.81793	159.424	8.87894	174.68	128.41	158.397	3.81793	90.6783
Spot 30	925.088	140874	1.71114	20.1432	0.794886	0.174618	2.77523	0.0255104	2.65896	0.958104		162.388	8.52781	163.419	8.37827	178.357	37.0796	162.388	8.52781	91.0466
Spot 16	2383.97	261425	2.78778	20.221	0.276523	0.187445	3.01095	0.02749	2.99822	0.995774		174.82	10.3421	174.447	9.65221	169.368	12.9151	174.82	10.3421	103.219
Spot 25	2386.41	163849	1.20612	20.2407	0.38942	0.187573	1.93878	0.0275357	1.89926	0.97962		175.107	6.56195	174.557	6.2187	167.09	18.1743	175.107	6.56195	104.798
Spot 13	344.547	263729	1.22266	13.3178	0.331555	1.70105	1.24381	0.164305	1.1988	0.963817		980.655	21.8112	1008.93	15.9077	1070.86	13.3042	1070.86	13.3042	91.5765
Spot 22	195.849	116391	1.45227	10.9512	0.611356	2.87219	5.51827	0.228125	5.4843	0.993844		1324.67	131.345	1374.65	83.1691	1453.15	23.2646	1453.15	23.2646	91.1585
Spot 28	64.5296	66961.2	1.25958	10.7998	1.23314	3.28033	1.87946	0.256941	1.41836	0.754664		1474.17	37.3813	1476.4	29.2525	1479.58	46.7608	1479.58	46.7608	99.6344
Spot 08	188.133	143296	3.21253	9.18574	0.360593	4.55575	0.831577	0.30351	0.749328	0.901093		1708.69	22.4947	1741.21	13.848	1780.48	13.15	1780.48	13.15	95.9679
Sample SR-260 (rejected analyses = 20/30)
Spot 03	321.912	4478.56	2.0177	19.9129	6.5144	0.16333	6.61574	0.0235884	1.15352	0.17436		150.295	3.42726	153.614	18.8632	205.144	302.537	150.295	3.42726	73.2631
Spot 05	832.719	81198.8	4.00325	20.1045	0.721513	0.164197	0.960268	0.0239417	0.633667	0.659885		152.52	1.91024	154.37	2.75036	182.85	33.6578	152.52	1.91024	83.4126
Spot 04	689.122	69928.4	3.02264	20.5148	1.67546	0.161174	1.83089	0.0239807	0.738233	0.40321		152.765	2.22901	151.73	5.16084	135.595	78.7439	152.765	2.22901	112.662
Spot 21	901.675	47775.9	1.21204	20.0469	0.854384	0.166385	1.15331	0.0241913	0.774692	0.671713		154.091	2.35915	156.277	3.34101	189.523	39.768	154.091	2.35915	81.3045
Spot 07	619.845	76806.7	2.02501	20.0651	1.14041	0.166236	1.72203	0.0241916	1.2903	0.749288		154.093	3.92937	156.147	4.98472	187.413	53.1223	154.093	3.92937	82.2212
Spot 11	229.852	19431.4	1.00579	20.8042	4.9749	0.160887	5.22343	0.0242756	1.59202	0.304784		154.622	4.86463	151.479	14.7012	102.588	235.373	154.622	4.86463	150.721
Spot 20	393.094	3256.97	3.30889	19.6535	7.55402	0.171507	7.5885	0.0244467	0.722526	0.0952133		155.698	2.22297	160.726	22.5617	235.492	349.021	155.698	2.22297	66.1163
Spot 02	371.502	2009.02	1.48233	20.1355	3.84033	0.16748	4.14729	0.0244582	1.56584	0.377557		155.77	4.81975	157.23	12.0821	179.252	179.057	155.77	4.81975	86.9001
Spot 24	652.538	63885.2	3.57667	20.13	1.9288	0.167874	2.11433	0.0245091	0.866083	0.409626		156.091	2.67128	157.572	6.17194	179.888	89.9228	156.091	2.67128	86.7711
Spot 17	760.573	67118	1.42094	20.0478	2.50196	0.170059	2.75133	0.0247267	1.14455	0.415998		157.459	3.56073	159.47	8.12075	189.418	116.447	157.459	3.56073	83.1282
Spot 12	1985.46	239106	2.84407	20.123	0.459016	0.171901	2.6671	0.0250881	2.6273	0.985079		159.733	8.29021	161.067	7.94488	180.701	21.4401	159.733	8.29021	88.3964
Spot 01	1049.27	79866.8	3.225	17.4229	1.31596	0.234009	1.60088	0.02957	0.911639	0.56946		187.857	3.37573	213.503	6.16503	506.749	57.893	187.857	3.37573	37.071
Spot 27	2400.17	87027.3	3.42763	20.2057	0.250015	0.237035	14.2733	0.0347365	14.2711	0.999847		220.125	61.7682	215.99	55.5549	171.131	11.6735	220.125	61.7682	128.63
Spot 14	2407.96	282973	1.36405	20.1855	0.341942	0.293384	1.92302	0.0429513	1.89238	0.984064		271.1	10.0477	261.22	8.85842	173.466	15.9594	271.1	10.0477	156.285
Spot 09	2411.36	369525	0.802567	20.2191	0.349761	0.373616	1.72756	0.0547879	1.69179	0.979291		343.85	11.3296	322.33	9.54239	169.591	16.311	343.85	11.3296	202.753
Spot 18	2411.31	137571	1.06964	20.2173	0.386051	0.378556	2.43258	0.0555077	2.40175	0.987327		348.247	16.2843	325.975	13.5656	169.789	17.9852	348.247	16.2843	205.106
Spot 23	2412.65	455836	1.16799	20.183	0.219058	0.42761	3.63805	0.0625941	3.63144	0.998186		391.382	27.58	361.478	22.1301	173.753	10.2239	391.382	27.58	225.252
Spot 10	2411.76	364151	1.82658	20.1993	0.237697	0.434795	2.72252	0.063697	2.71212	0.996181		398.07	20.9391	366.576	16.7546	171.879	11.0969	398.07	20.9391	231.599
Spot 19	100.863	152677	2.29148	14.3362	2.04885	0.774482	8.6788	0.0805273	8.4335	0.971735		499.269	81.0343	582.331	76.9604	921.129	84.2526	499.269	81.0343	54.2019
Spot 26	556.183	6351.74	3.44813	10.5077	0.860435	2.34935	5.34181	0.179042	5.27205	0.986942		1061.74	103.22	1227.36	76.127	1531.39	32.4	1531.39	32.4	69.3316
Table footnotes:
1. Best age is determined from 206Pb/238U age for analyses with 206Pb/238U age <900 Ma and from 206Pb/207Pb age for analyses with 206Pb/238Uage >900 Ma.
2. Concordance is based on 206Pb/238U age / 206Pb/207Pb age.
3. Analyses with >10% discordance (<90% concordant) or >5% reverse discordance (>105% concordant) are "rejected" in this table.
4. All uncertainties include only measurement errors.
5. Systematic errors are 1.34% (206Pb/238U) and 0.75% (206Pb/207Pb) at 2-sigma level, and include uncertainty in calibration correction, initial Pb composition, decay constants, & error of std age.
6. Analyses conducted by LA-ICPMS, as described by Gehrels et al. (2008).
7. Raw data was processed using the Laserchron's in-house spreadsheet AgeCalc with 7 out of 59 standards rejected.
8. Common Pb correction is from measured 204Pb with common Pb composition interpreted from Stacey and Kramers (1975).
9. Common Pb composition assigned uncertainties of 1.5 for 206Pb/204Pb, 0.3 for 207Pb/204Pb, and 2.0 for 208Pb/204Pb.
10. U/Pb and 206Pb/207Pb fractionation is calibrated relative to fragments of large Sri Lanka zircons with individual crystals of R33 analyzed as a control.
11. U decay constants and composition as follows: 238U = 9.8485 x 10-10, 235U = 1.55125 x 10-10, 238U/235U = 137.82.
12. U-Th disequilibrium correction is applied to 206/238 ages assuming a value of 2.3 for the magma.
References:
Gehrels, G.E., Valencia, V., Ruiz, J., 2008, Enhanced precision, accuracy, efficiency, and spatial resolution of U-Pb ages by laser ablation-multicollector-inductively coupled plasma-mass spectrometry: Geochemistry, Geophysics, Geosystems, v. 9, Q03017, doi:10.1029/2007GC001805.

## Sheet: S2 strain
Table S2. Stretched pebble finite strain measurements (ellipsoid axes diameters)
White Cloud Point locality (in situ)								White Cloud Point locality (talus block)								Hendry's Creek locality (in situ)
Spot	X (mm)	Y (mm)	Z (mm)	X:Y	X:Z	Y:Z		Spot	X (mm)	Y (mm)	Z (mm)	X:Y	X:Z	Y:Z		Spot	X (mm)	Y (mm)	Z (mm)	X:Y	X:Z	Y:Z
1	37	12	6	3.08333	6.16667	2		1	38	17	10	2.23529	3.8	1.7		1	7.5	1		7.5
2	36	13	6	2.76923	6	2.16667		2	34	20	6	1.7	5.66667	3.33333		2	4.25	1		4.25
3	57	10		5.7				3	25	14	7	1.78571	3.57143	2		3	1.5	0.5		3
4	31	8		3.875				4	39	15		2.6				4		1.5	0.3			5
5	32	8		4				5	48	10		4.8				5		2	0.5			4
6	40	17		2.35294				6	31	15		2.06667				6		0.5	0.25			2
7		10	8			1.25		7	44	18		2.44444
8	63	11		5.72727				8	41	15		2.73333
9		13	10			1.3		9	51	18		2.83333
10	56	6		9.33333				10	*60	17	13	3.52941	4.61538	1.30769
								11	32	14		2.28571
								12		8	6			1.33333
								13		11	6			1.83333
								14		12	9			1.33333
								15		12	11			1.09091
								16	28	12		2.33333
								17	22	12	*6	1.83333	3.66667	2
								18		13	10			1.3
								19	29	11	7	2.63636	4.14286	1.57143
								20	42	18		2.33333
								21	37	11		3.36364
								22	52	14		3.71429
								23	44	13		3.38462
								24	43	15		2.86667
								25	53	11		4.81818
								26	27	16		1.6875
								27	38	8		4.75
								28	38	16		2.375
								29	50	15		3.33333
								30	45	14		3.21429
								31		15	7			2.14286
								32		12	4			3
								33	60	17	8	3.52941	7.5	2.125
								34		9	5			1.8
								35		12	7			1.71429
								36		16	11			1.45455
			AVERAGE	4.60514	6.08333	1.67917					AVERAGE	2.89182	4.709	1.82589					AVERAGE	4.91667	18.0278	3.66667
			MAX	9.33333	6.16667	2.16667					MAX	4.81818	7.5	3.33333					MAX	7.5		5
			MIN	2.35294	6	1.25					MIN	1.6875	3.57143	1.09091					MIN	3		2
			STDEV	2.2826	0.117851	0.472067					STDEV	0.917024	1.42845	0.597059					STDEV	2.32289		1.52753
			STD ERR	0.807021	0.0833333	0.236033					STD ERR	0.179843	0.539905	0.144808						1.34112	n.a.	0.881917
			z/r =	0.46088							z/r =	0.488127							z/r =	0.247322
			K (strain shape) =	2.94652							K (strain shape) =	1.76374							K (strain shape) =	1.22578
			D (strain intensity) =	1.61273							D (strain intensity) =	1.22069							D (strain intensity) =	2.05539
Table footnotes:
X, Y, and Z measurements are the diameters of the stretched pebble along the ellipsoid axes.
White Cloud Point locality (39.51540 N, -114.30972 N, ~2,280 m elevation) is in the NW corner of the northern Snake Range.
Measurements were of stretched quartz pebble conglomerate with stretching axis trending N20W
Measurements 1-36 were from a large talus block which had fallen out of place.
Measurements 37-46 were from in situ outcrops on the ridge above to the northwest of the talus block.
Hendry's Creek locality is in the SE portion of the northern Snake Range.
Measurements were of stretched pebble conglomerate.
Measurements 1-6 were from in situ outcrops.
* = value estimated from a broken or incomplete pebble.
z/r = radius of measured ellipsoid z-axis divided by radius of pre-strained pebble (i.e., present day thickness as % of original thickness)
Pebbles are assumed to have been spherical prior to deformation.
The z-axis is the axis of maximum shortening.
r/z is calculated as (x/z*y/z)^(1/3) which is derived by equating the volume of a sphere to that of an ellipsoid.
K (strain shape) = Ln(X/Y)/Ln(Y/Z)
D (strain intensity) = SQRT(Ln(X/Y)^2+Ln(Y/Z)^2)

## Sheet: S3 RSCM
Table S3. Raman spectroscopy of carbonaceous material data
					Aoya et al. (2010) calibration						Kouketsu et al. (2014) calibration
	D1 (1350)	G (1580)	D2 (1620)		(based on area)	Aoya et al (2010)		D1 (1350)	D2 (1620)		Equation 1 (D1)	Equation 2 (D2)
Analysis	Area	Area	Area		R2 = D1/(G+D1+D2)	T (°C)		FWHM	FWHM		T (°C)	T (°C)
Sample 16CH26 (Ce, lower plate)
16CH26_01	139734	734843	15566.9		0.156979	591.225
16CH26_02	1050000	1880000	230695		0.332205	501.581
16CH26_03	1120000	1850000	120241		0.362431	486.685
16CH26_04	252289	1070000	14546		0.188721	574.57
16CH26_05	188066	523161	26701		0.254857	540.46
16CH26_06	103000	1019770	0		0.0917374	626.036
16CH26_07	97733.7	483924	5855.68		0.166351	586.288
16CH26_08	134605	460355	12347.6		0.221642	557.49
16CH26_09	79658.5	376982	18710.7		0.167578	585.643
16CH26_10	163198	378936	44929.3		0.27799	528.717
16CH26_11	256602	382312	40006.7		0.377956	479.1
16CH26_12	191715	444463	28789.4		0.288307	523.512
16CH26_13	218761	564273	30820.5		0.268796	533.372
16CH26_14	87295.6	331990	12058.5		0.20238	567.459
16CH26_15	88203.5	278515	6067.45		0.236606	549.793
16CH26_16	267529	385107	50394.8		0.380537	477.843
16CH26_17	132327	342477	16643.4		0.26926	533.137
16CH26_18	103681	261725	6598.12		0.278709	528.354
16CH26_19	309053	552149	65907.3		0.333351	501.013
16CH26_20	153477	477747	36370.9		0.229895	553.24
16CH26_21	17568.7	280273	25643.3		0.0543107	646.357
16CH26_22	265976	560825	43855		0.305489	514.886
16CH26_23	278192	604149	44682		0.300092	517.59
16CH26_24	192167	595806	16654.5		0.238827	548.654
16CH26_25	204192	478033	21825.8		0.290025	522.647
16CH26_26	309863	554670	40314.5		0.342448	496.515
16CH26_27	410829	404230	60179.7		0.469391	435.316
16CH26_28	267276	470279	58299.7		0.335835	499.783
16CH26_29	38601.3	209489	0		0.155594	591.956
16CH26_30	44302.9	303504	4659.62		0.125694	607.82
				MEAN	0.2568	539.47
				STDEV	0.0930546	47.4887
				n=	30	30
				S.E.	0.0169894	8.67021
				Total error		50.7462
Repeat
16CH26_03_litof	890597	1750000	88633.2		0.326318	504.502
Sample 16CH14b (Cn, lower plate)
16CH14b_01	805849	858691	134444		0.447947	445.447
16CH14b_02	150069	433144	20204		0.248699	543.602
16CH14b_03	642536	602571	152693		0.459677	439.895
16CH14b_04	976000	769000	392000		0.456715	441.294
16CH14b_05	682904	863540	103657		0.413856	461.727
16CH14b_06	805849	858691	134444		0.447947	445.447
16CH14b_07	1110000	1260000	155914		0.439445	449.487
16CH14b_08	510276	668490	99429.4		0.399216	468.783
16CH14b_09	702505	799335	89250.9		0.441524	448.498
16CH14b_10	1160000	1160000	54278.5		0.488569	426.326
16CH14b_11	464734	608087	61030		0.409872	463.643
16CH14b_12	674349	995593	178951		0.364731	485.559
16CH14b_13	176663	464448	0		0.275558	529.947
16CH14b_14	414897	633606	170002		0.340497	497.478
16CH14b_15	388848	909128	90189		0.280117	527.643
16CH14b_16	123782	350363	65265.1		0.229477	553.455
16CH14b_17	366528	992647	120121		0.247772	544.076
16CH14b_18	300588	311251	118019		0.411844	462.694
16CH14b_19	1120000	1170000	137451		0.461389	439.086
16CH14b_20	1440000	1520000	248669		0.448784	445.05
				MEAN	0.385682	475.341
				STDEV	0.0842194	41.3849
				n=	20	20
				S.E.	0.018832	9.25395
				Total error		50.8491
Repeat
16CH14b_08b	531880	615382	55954.6		0.442048	448.249
16CH14b_08c	605467	727665	83112.6		0.427516	455.178
16CH14b_08d	502880	747525	98044		0.372932	481.55
16CH14b_08longer	3720000	3320000	459623		0.496025	422.849
Sample 16CH22 (Cr, lower plate)
16CH22_01	519920	589114	56213		0.446189	446.282
16CH22_02	67271.5	365377	10180.2		0.151913	593.9
16CH22_03	35196.5	371714	22586.5		0.0819482	631.326
16CH22_04	156065	449238	0		0.25783	538.945
16CH22_05	406125	337173	50639.7		0.511533	415.651
16CH22_06	46773.9	555500	95783.6		0.0670058	639.435
16CH22_07	119414	314593	10621.7		0.26857	533.487
16CH22_08	1430000	1420000	178715		0.472147	434.02
16CH22_09	1370000	1210000	152592		0.501355	420.37
16CH22_10	251690	498243	19446.1		0.327134	504.097
16CH22_11	246964	1390000	15297.5		0.14947	595.192
16CH22_12	417630	1200000	30907.1		0.253334	541.236
16CH22_13	534491	967401	51190.6		0.344148	495.675
16CH22_14	82110.3	568968	5051.02		0.125143	608.114
16CH22_15	739762	1390000	79127		0.334902	500.245
16CH22_16	208737	1190000	26324.7		0.146476	596.777
16CH22_17	187571	994814	15158.4		0.15663	591.409
16CH22_18	1380000	1570000	144808		0.445908	446.415
16CH22_19	1050000	1670000	157993		0.364838	485.507
16CH22_20	364956	1250000	29214.3		0.22197	557.322
16CH22_21	50647.9	193973	10347.2		0.198644	569.401
16CH22_22	725829	1010000	82328.9		0.399211	468.785
16CH22_23	118601	364556	15834.5		0.237681	549.241
16CH22_24	104377	706034	43847.9		0.122184	609.693
16CH22_25	835853	1160000	106225		0.397632	469.549
16CH22_26	1050000	1720000	98248.7		0.366077	484.9
16CH22_27	622944	1910000	53126.6		0.240884	547.6
16CH22_28	2050000	1820000	232020		0.499754	421.114
16CH22_29	1390000	2300000	174640		0.359671	488.039
16CH22_30	848579	1530000	96718.9		0.342819	496.332
				MEAN	0.2931	521.1
				STDEV	0.133226	66.9653
				n=	30	30
				S.E.	0.0243236	12.2261
				Total error		51.4731
Repeat
16CH22_07b	180132	456238	16017.4		0.276112	529.667
16CH22_20_repeat	158054	342585	13830.5		0.307217	514.022
16CH22_26_repeat	991442	1670000	81944.3		0.361394	487.194
16CH22_28_repeat	4460000	3950000	523080		0.499268	421.34
16CH22_28_repeat3	4570000	4100000	480852		0.499407	421.276
16CH22_28_repeat4	4570000	4150000	476098		0.49695	422.419
16CH22_28_repeat5	4630000	4280000	471009		0.49355	424.002
Sample 16CH24a (Cmn, lower plate)
16CH24a_01	1280000	1220000	122534		0.488078	426.556
16CH24a_02	312510	619003	24059.1		0.32704	504.144
16CH24a_03	650272	1810000	56279.4		0.258398	538.656
16CH24a_04	265996	1250000	15300.2		0.173706	582.425
16CH24a_05	555322	1910000	38670.8		0.221775	557.422
16CH24a_06	2470000	1920000	183984		0.540011	402.545
16CH24a_07	359898	811969	81767.1		0.287084	524.128
16CH24a_08	233978	280952	22845.4		0.435085	451.564
16CH24a_09	786549	767570	121884		0.4693	435.358
16CH24a_10	17797.9	994529	0		0.0175812	666.548
16CH24a_11	712710	1510000	53554.5		0.313105	511.08
16CH24a_12	834266	1180000	188234		0.378781	478.698
16CH24a_13	789431	968324	113157		0.42195	457.842
16CH24a_14	784417	716202	67579.4		0.500203	420.906
16CH24a_15	1660000	1480000	120455		0.509131	416.762
16CH24a_16	870848	894412	107475		0.465014	437.377
16CH24a_17	903594	899811	77067		0.480514	430.094
16CH24a_18	38329.1	1290000	0		0.0288551	660.324
16CH24a_19	103163	615768	0		0.143495	598.356
16CH24a_20	1210000	1260000	147014		0.462359	438.629
16CH24a_21	718390	992296	85061.4		0.400051	468.38
16CH24a_22	1200000	1130000	157622		0.482388	429.216
16CH24a_23	568551	1430000	61857.8		0.275941	529.754
16CH24a_24	375933	1290000	34026		0.221142	557.748
16CH24a_25	443074	718306	78775.2		0.357273	489.216
16CH24a_26	557275	1230000	66447.8		0.300625	517.323
16CH24a_27	1390000	1220000	161422		0.501548	420.281
16CH24a_28	204981	833203	16740.7		0.194309	571.657
16CH24a_29	1040000	731032	216643		0.523224	410.252
16CH24a_30	214652	1150000	8785.79		0.156288	591.589
				MEAN	0.344475	495.514
				STDEV	0.1497	75.0222
				n=	30	30
				S.E.	0.0273313	13.6971
				Total error		51.8422
Repeat
16CH24a_01_high_confocality	234415	229742	21175.4		0.482999	428.93
Sample 16CH09b (Cm, upper plate)
16CH09b_01	2580000	795056	0		0.764432	304.457		104.584	23.1876		253.144	377.788
16CH09b_02	4100000	1510000	0		0.730838	318.554		76.3608	50.0255		313.824	195.827
16CH09b_03	2870000	1700000	0		0.628009	362.986		61.7516	35.2578		345.234	295.952
16CH09b_04	16100000	5100000	1840000		0.698785	332.197		168.719	48.9102		115.254	203.389
16CH09b_05	24600000	11800000	0		0.675824	342.085		125	60		209.25	128.2
16CH09b_06	2050000	436765	0		0.824364	279.819		116.181	59.9348		228.211	128.642
16CH09b_07	8880000	1870000	2060000		0.693208	334.589		81.3549	44.9001		303.087	230.577
16CH09b_08	3070000	2800000	0		0.522998	410.356		77.653	74.2728		311.046	31.4304
16CH09b_09	4920000	1800000	0		0.732143	318.002
16CH09b_10	1810000	485402	301852		0.69689	333.009		125	43.731		209.25	238.504
16CH09b_11	3360000	1360000	0		0.711864	326.607		99.4411	16.3602		264.202	424.078
16CH09b_12	1420000	257373	0		0.846562	270.861		112.904	25.7015		235.256	360.744
16CH09b_13	10500000	3130000	0		0.77036	301.991		87	36		290.95	290.92
16CH09b_14	4630000	1140000	0		0.802426	288.762		99.8609	50.1207		263.299	195.182
16CH09b_15	3610000	1080000	0		0.769723	302.255		85.8355	49.0494		293.454	202.445
16CH09b_16	3880000	1030000	0		0.790224	293.773		89.0726	49.4263		286.494	199.89
16CH09b_17	1870000	687526	0		0.731175	318.411		79.0263	54.8293		308.093	163.257
				MEAN	0.728813	319.41				MEAN	264.378	229.177
				STDEV	0.07733	33.2194				STDEV	56.1012	101.324
				n=	17	17				n=	16	16
				S.E.	0.0187553	8.05689				S.E.	14.0253	25.3311
				Total error		50.645				Total error	51.9298	56.0506
Cooper (2008) sample FMW76, top of (?) Cr (lower plate), Marble Wash
1	30360	2161.2	54578		0.348568	493.497
2	22502	3146.4	51682		0.290985	522.164
3	162420	10462	143160		0.513919	414.547
4	64809	6410.8	212210		0.22866	553.875
5	101530	2518.9	79003		0.554651	395.866
6	24231	4285.2	69494		0.247229	544.353
7	98538	6030.3	58664		0.603667	373.787
8	21791	5539.9	58478		0.253948	540.923
9	22997	18450	33504		0.306827	514.217
10	110930	10389	137480		0.428634	454.644
				MEAN	0.377709	479.22
				STDEV	0.138027	66.4345
				n=	10	10
				S.E.	0.0436481	21.0084
				Total error		54.2343
Sample 16CH13 (Cn, lower plate)
16CH13_01	85484.9	403824	13407.1		0.170046	584.346
16CH13_02	74011.7	320769	17649.9		0.179452	579.414
16CH13_03	113292	323466	10563		0.253268	541.27
16CH13_04	75327.5	353410	28722		0.164665	587.175
16CH13_05	1080000	2920000	422880		0.244185	545.91
16CH13_06_defects	7930000	4330000	0		0.646819	354.714
16CH13_07_defects	735745	755959	181668		0.439678	449.376
16CH13_08	159308	728425	60112.2		0.168074	585.382
16CH13_09	619336	1230000	147838		0.310106	512.577
16CH13_10	244809	659982	70993.8		0.250884	542.486
16CH13_11	280871	555593	63630		0.312046	511.609
16CH13_12	113238	413144	22796.6		0.206195	565.48
16CH13_13	105038	408833	28978.3		0.193494	572.081
16CH13_14_defects	4710000	6130000	1380000		0.385434	475.462
16CH13_15	85014.7	543816	30848.1		0.128873	606.126
16CH13_16	97550.2	250395	0		0.280361	527.52
				MEAN	0.270849	532.332
				STDEV	0.131252	64.1395
				n=	16	16
				S.E.	0.0328131	16.0349
				Total error		52.5083
Repeat
16CH13_08_defect	154594	260337	42570.5		0.337909	498.757
16CH13_08_3rd_defects	75400000	33500000	2530000		0.676658	341.724
Sample 16CH28 (Ce)
16CH28_01	199764	364554	12192		0.346506	494.513
16CH28_02	27051	349373	0		0.0718631	636.795
16CH28_03	1280000	1510000	137063		0.437298	450.509
16CH28_04	79504.4	491510	13617.5		0.135991	602.339
16CH28_05	200459	781536	20822.7		0.199896	568.75
16CH28_06	70525.8	546578	8721.56		0.112692	614.77
16CH28_07	383129	608331	27502.4		0.375999	480.053
16CH28_08	189864	879287	30410		0.172673	582.967
16CH28_09	168908	546917	67132.2		0.215731	560.543
16CH28_10	141985	732331	13879.3		0.159858	589.707
16CH28_11	26183.5	676828	7094.05		0.0368727	655.912
16CH28_12	77016.3	512922	26305.7		0.124977	608.203
				MEAN	0.199196	569.114
				STDEV	0.124946	64.0057
				n=	12	12
				S.E.	0.0360687	18.4769
				Total error		53.3047
Sample 16CH12a (Cm)
16CH12a_01	6390000	1460000	1490000		0.684154	338.486		67.4472	30		332.989	331.6
16CH12a_02	5930000	1730000	2290000		0.59598	377.221		53.5794	5.45863		362.804	497.99
16CH12a_03	7310000	1930000	2110000		0.644053	355.926		102.972	44.082		256.61	236.124
16CH12a_04	6420000	929555	2290000		0.666006	346.343		68.1738	13.1929		331.426	445.552
16CH12a_05	5390000	1290000	2180000		0.608352	371.7		52.5754	14.1975		364.963	438.741
16CH12a_06	5970000	1460000	1950000		0.636461	359.261		73.6652	3.54163		319.62	510.988
16CH12a_07	8360000	2210000	2540000		0.637681	358.725		71.9621	4.82147		323.281	502.31
16CH12a_08	6490000	1060000	2490000		0.646414	354.891		71.2256	10.4356		324.865	464.247
16CH12a_09	6000000	1340000	2120000		0.634249	360.235		76.2395	4.02556		314.085	507.707
16CH12a_10	7050000	723731	3000000		0.654369	351.412		72.7969	14.6679		321.487	435.552
16CH12a_11	9040000	4320000	2140000		0.583226	382.941		95.9449	40		271.718	263.8
16CH12a_12	4610000	1710000	825740		0.64514	355.45		102.103	40		258.479	263.8
				MEAN	0.63634	359.314				MEAN	315.194	408.201
				STDEV	0.028555	12.5912				STDEV	35.7796	104.787
				n=	12	12				n=	12	12
				S.E.	0.00824313	3.63477				S.E.	10.3287	30.2494
				Total error		50.1319				Total error	51.0557	58.4382
Repeat
16CH12a_02_2nd	6170000	547216	2480000		0.670855	344.238		54.3358	43.0875		361.178	242.867
Sample 16CH07b (Cm)
16CH07b_01	4170000	1030000	1100000		0.661905	348.126		104.1	39.2		254.185	269.224
16CH07b_02	5710000	2680000	2740000		0.513028	414.959		118.9	33.5		222.365	307.87
16CH07b_03	3350000	2510000	346094		0.539792	402.645		63.7	28.5		341.045	341.77
16CH07b_04	7040000	2450000	664756		0.693271	334.562		58.3	22.5		352.655	382.45
				MEAN	0.601999	374.532				MEAN	292.562	325.329
				STDEV	0.0888911	39.6584				STDEV	64.1929	48.2552
				n=	4	4				n=	4	4
				S.E.	0.0444456	19.8292				S.E.	32.0964	24.1276
				Total error		53.7884				Total error	59.4153	55.517
Sample 16CH42 (Cd)
16CH42_01	752349	456392	1010000		0.339088	498.174		70.0063	34.5455		327.486	300.782
16CH42_02	1200000	541073	30345.4		0.677423	341.393		95.3032	21.0559		273.098	392.241
16CH42_03	1520000	250230	96090.5		0.814437	283.855		94.7687	27.69		274.247	347.262
16CH42_04	5230000	1190000	3550000		0.524574	409.631		71.8982	38.0663		323.419	276.91
16CH42_05	32600000	0	7490000		0.81317	284.371		126.57	35.567		205.875	293.856
16CH42_06	1230000	0	167604		0.880078	257.505		85.7489	40.8082		293.64	258.32
16CH42_07	635126	0	2950000		0.177156	580.617		51.279	22.5265		367.75	382.27
16CH42_08	128760	0	138199		0.482321	429.247		49.0442	88.5062		372.555	-65.072
16CH42_09	252022	0	1400000		0.152554	593.562		46.5854	38.3408		377.841	275.049
16CH42_10	494562	1490000	394987		0.207839	564.628		51.8625	22.1031		366.496	385.141
16CH42_11	1250000	0	4290000		0.225632	555.434		50.3922	36.5396		369.657	287.262
16CH42_12	4840000	0	11200000		0.301746	516.761		61.5185	40.0611		345.735	263.386
16CH42_13	6290000	0	13600000		0.316239	509.517		64.0134	40.112		340.371	263.041
16CH42_14	455225	0	1240000		0.268534	533.506		59.0661	50.4464		351.008	192.973
16CH42_15	438151	0	274594		0.614737	368.862		91.8784	93.9226		280.461	-101.795
				MEAN	0.453035	443.036				MEAN	324.643	250.108
				STDEV	0.252418	117.021				STDEV	49.5512	146.237
				n=	15	15				n=	15	15
				S.E.	0.065174	30.2147				S.E.	12.7941	37.7582
				Total error		58.4203				Total error	51.6109	62.6553
Sample 16CH58 (Dg)
16CH58_01	5550000	0	2790000		0.665468	346.577		118.127	51.0374		224.027	188.966
16CH58_02	8680000	0	1930000		0.818096	282.365		126.699	47.0644		205.597	215.903
16CH58_03	2830000	0	1280000		0.688564	336.586		123.802	55.8711		211.826	156.194
16CH58_04	6060000	0	2010000		0.750929	310.098		118.156	51.95		223.965	182.779
16CH58_05	4670000	0	1210000		0.794218	292.13		132.321	53.2546		193.51	173.934
16CH58_06	13100000	0	2630000		0.832804	276.403		132.021	47.8567		194.155	210.532
16CH58_07	9450000	0	3730000		0.716995	324.423		119.196	48.996		221.729	202.807
16CH58_08	34300000	0	5580000		0.86008	265.449		174.744	47.6472		102.3	211.952
16CH58_09	7090000	0	2960000		0.705473	329.335		125.819	58.7381		207.489	136.756
16CH58_10	15600000	0	4780000		0.765456	304.03		141.055	53.1484		174.732	174.654
16CH58_11	3260000	0	3310000		0.496195	422.77		98.3129	50.6146		266.627	191.833
				MEAN	0.735843	316.44				MEAN	202.36	186.028
				STDEV	0.101	43.5793				STDEV	40.6066	24.6838
				n=	11	11				n=	11	11
				S.E.	0.0304528	13.1397				S.E.	12.2433	7.44246
				Total error		51.6977				Total error	51.4772	50.5509
Sample 16CH52 (SO)
16CH52_01	4030000	4180000	3080000		0.356953	489.373		80.2631	32.6601		305.434	313.565
16CH52_02	8410000	0	7490000		0.528931	407.627		108.335	47.1553		245.08	215.287
16CH52_03	6190000	7070000	4420000		0.350113	492.736		89.7596	36.9245		285.017	284.652
16CH52_04	20300000	0	12400000		0.620795	366.176		115.999	48.7827		228.602	204.253
16CH52_05	23100000	0	14300000		0.617647	367.571		114.86	48.2746		231.051	207.698
16CH52_06	18200000	0	10900000		0.62543	364.126		116.032	48.7365		228.531	204.567
16CH52_07	22300000	0	13700000		0.619444	366.774		114.969	48.932		230.817	203.241
				MEAN	0.53133	406.524				MEAN	250.647	233.323
				STDEV	0.126046	58.8922				STDEV	31.5337	45.8843
				n=	7	7				n=	7	7
				S.E.	0.0476411	22.2591				S.E.	11.9186	17.3426
				Total error		54.7309				Total error	51.4009	52.9223
Sample 16CH34 (Op)
16CH34_01	356438	670552	25622.7		0.338622	498.405
16CH34_02	1290000	1160000	168064		0.492731	424.384
16CH34_03	76805.2	211929	71403.9		0.213266	561.817
16CH34_04	61070.6	986298	16435.1		0.0574078	644.665
				MEAN	0.275507	529.973
				STDEV	0.184942	93.616
				n=	4	4
				S.E.	0.0924711	46.808
				Total error		68.4908
Sample 16CH56 (Mj)
16CH56_01	29900000	0	19900000		0.600402	375.245		129.222	59.546		200.173	131.278
16CH56_02	9800000	0	6490000		0.601596	374.711		128.452	60.6177		201.828	124.012
16CH56_03	6540000	0	4320000		0.60221	374.437		132.799	65.8128		192.482	88.7892
16CH56_04	7850000	0	5680000		0.580192	384.306		140.379	68.7482		176.185	68.8872
16CH56_05	14100000	0	9870000		0.588235	380.691		122.786	60.9473		214.01	121.777
16CH56_06	14100000	0	9450000		0.598726	375.993		131.531	63.6031		195.208	103.771
16CH56_07	15300000	0	11000000		0.581749	383.606		132.464	66.0705		193.202	87.042
16CH56_08	15800000	0	11000000		0.589552	380.1		141.798	68.9895		173.134	67.2512
16CH56_09	16800000	0	12000000		0.583333	382.893		131.435	66.1491		195.415	86.5091
16CH56_10	15800000	0	10600000		0.598485	376.101		129.77	63.7099		198.995	103.047
16CH56_11	8717.67	0	13321.3		0.395557	470.553		130.541	62.8061		197.337	109.175
16CH56_12	17900000	0	12200000		0.594684	377.801		141.011	68.2302		174.826	72.3992
				MEAN	0.576227	386.093				MEAN	192.733	96.9948
				STDEV	0.05745	26.7495				STDEV	12.2229	21.9635
				n=	12	12				n=	12	12
				S.E.	0.0165844	7.72192				S.E.	3.52843	6.34031
				Total error		50.5928				Total error	50.1243	50.4004
Table footnotes:
Analyses were performed at Stanford University. Data was reduced with Igor Pro using Multi-peak fit (v. 2.05): Voigt fit, cubic or logpoly5 baseline correction, entire wavenumber range optimized for region of 1200-1700 cm-1.
Temperatures were calculated using equation 3 (recalibration for 514 nm lasers) of Aoya et al (2010).
STDEV, standard deviation; S.E., Standard error, calculated as standard deviation divided by square-root of number of analyses
Total error includes external error of method (50 °C) added in quadrature to standard error.
Weighted averages use total signal intensity (usually signifying a higher signal to noise ratio) by taking the square of total area for each peak, divided by the peak area, and then propagated through the R2 ratio
FWHM values often need to be corrected relative to the instrumental parameters using the equation FWHM-corrected = FWHM-measured * SQRT ( 1 - 2 * ( spectral resolution / FWHM-measured )^2 ), but at the large FWHM values measured here this correction is insignificant.
Numbers in italics were estimated from plots of Raman data
R2 values less than 0.5 were taken as being indicative of >400 degC temps (after Rahl et al., 2005)
Low temperature calibration (i.e., Kouketsu et al., 2014) is not calculated for samples interpreted as >400 °C.
Equation 1 of Kouketsu is preferred at low temps since the D1 peak is typically easier to resolve than D2 and is more sensitive to temperature.

## Sheet: Info
This Supplemental Material accompanies
Hoiland, C., Hourigan, J., and Miller, E., 2022, Evidence for large departures from lithostatic pressure
during Late Cretaceous metamorphism in the northern Snake Range metamorphic core complex, Nevada,
in Craddock, J.P., Malone, D.H., Foreman, B.Z., and Konstantinou, A., eds., Tectonic Evolution of the
Sevier-Laramide Hinterland, Thrust Belt, and Foreland, and Postorogenic Slab Rollback (180–20 Ma):
Geological Society of America Special Paper 555, https://doi.org/10.1130/2021.2555(07).
